# Supplementary material for: β-Carboline-directed decarboxylative acylation of ortho-C(sp2)–H of the aryl ring of aryl(β-carbolin-1-yl)methanones with α-ketoacids under palladium catalysis
Source: Royal Society of Chemistry journal article supplement (doi:10.1039/c6ra11811a), 2016-01-01
Supplement: c6ra11811a1.pdf [file c6ra11811a1.pdf]

# Supporting information

*for*

## **$\beta$ -Carboline-directed decarboxylative acylation of *ortho*-C(sp<sup>2</sup>)-H of aryl ring of aryl ( $\beta$ -carbolin-1-yl) methanones with $\alpha$ -ketoacids under Palladium catalysis**

Shivalinga Kolle,<sup>a</sup> and Sanjay Batra\*<sup>a,b</sup>

<sup>a</sup>Medicinal and Process Chemistry Division, CSIR-Central Drug Research Institute, Sector 10, Jankipuram Extension, Sitapur Road, Lucknow-226031, UP, India.

<sup>b</sup>Academy of Scientific and Innovative Research, New Delhi-110025, India

E mail: [batra\\_san@yahoo.co.uk](mailto:batra_san@yahoo.co.uk), [s\\_batra@cdri.res.in](mailto:s_batra@cdri.res.in)

### **Contents:**

|                                                                              |     |
|------------------------------------------------------------------------------|-----|
| 1. General information                                                       | S-2 |
| 2. Spectroscopic data for starting aryl ( $\beta$ -carbolin-1-yl) methanones | S-2 |
| 3. References                                                                | S-3 |
| 4. Copies of <sup>1</sup> H and <sup>13</sup> C NMR spectra                  | S-4 |

## 1. General information:

All reactions were monitored by thin layer chromatography (TLC). TLC was performed on pre-coated silica gel plates. After elution, plate was visualized under UV illumination at 254 nm. The melting points were recorded on a hot stage apparatus using silicone oil and are uncorrected. IR spectra were recorded using a FTIR spectrophotometer.  $^1\text{H}$  NMR and  $^{13}\text{C}$  NMR spectra were recorded on 400 and 500 MHz spectrometers, using TMS as an internal standard (chemical shifts in  $\delta$ ). Peak multiplicities of NMR signals were designated as s (singlet), bs (broad singlet), d (doublet), dd (doublet of doublet), t (triplet), m (multiplet) etc. The ESI-MS were recorded on Ion Trap Mass spectrometer and the HRMS spectra were recorded as ESI-HRMS on a Q-TOF LC-MS/MS mass spectrometer. Commercial grade reagents and solvents were used without further purification.

2. The aryl ( $\beta$ -carbolin-1-yl) methanones were prepared according to the literature procedure.<sup>1</sup>

**(6-Bromo-9H-pyrido[3,4-*b*]indol-1-yl)(phenyl)methanone (1m).** A yellow solid, mp 106-

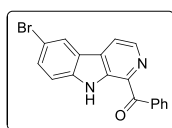

108 °C.  $^1\text{H}$  NMR (400 MHz,  $\text{CDCl}_3$ ):  $\delta$  (ppm) = 7.42-7.49 (m, 3H), 7.55 (t,  $J$  = 6.9 Hz, 1H), 7.62-7.64 (m, 1H), 8.05 (d,  $J$  = 4.8 Hz, 1H), 8.23-8.26 (m, 3H), 8.56 (d,  $J$  = 4.9 Hz, 1H), 10.44 (s, 1H).  $^{13}\text{C}$  NMR (100 MHz,  $\text{CDCl}_3$ ):  $\delta$  (ppm)

= 113.7, 118.7, 122.7, 124.7, 128.2, 130.7, 131.4, 132.2, 132.7, 136.7, 137.4, 137.5, 138.4, 139.7, 195.5. MS (ESI+)  $m/z$  = 351.1. ESI-HRMS calculated for  $\text{C}_{18}\text{H}_{11}\text{BrN}_2\text{O}$   $[\text{MH}]^+$ : 351.0133, found: 351.0135.

**(6-Chloro-9H-pyrido[3,4-*b*]indol-1-yl)(phenyl)methanone (1n).** A yellow solid, mp 124-

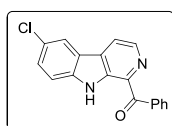

126 °C.  $^1\text{H}$  NMR (400 MHz,  $\text{CDCl}_3$ ):  $\delta$  (ppm) = 7.45-7.54 (m, 5H), 8.04 (d,  $J$  = 8.6 Hz, 2H), 8.25 (d,  $J$  = 7.5 Hz, 2H), 8.55 (d,  $J$  = 4.3 Hz, 1H), 10.42 (s, 1H).  $^{13}\text{C}$  NMR (100 MHz,  $\text{CDCl}_3$ ):  $\delta$  (ppm) = 113.2, 118.7, 121.6, 122.2, 126.5,

128.2, 129.6, 130.9, 131.4, 132.7, 136.8, 137.5, 137.8, 138.4, 139.4, 195.5. MS (ESI+)  $m/z$  = 307.1. ESI-HRMS calculated for  $\text{C}_{18}\text{H}_{11}\text{ClN}_2\text{O}$   $[\text{MH}]^+$ : 307.0638, found: 307.0636.

**(9H-carbazol-1-yl)(phenyl)methanone (4)**<sup>2</sup>. A pale yellow solid, mp 154-156 °C.  $^1\text{H}$  NMR

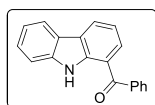

(400 MHz,  $\text{CDCl}_3$ ):  $\delta$  (ppm) = 7.15-7.19 (m, 1H), 7.23 (t,  $J$  = 7.3 Hz, 1H), 7.40-7.55 (m, 5H), 7.73 (d,  $J$  = 7.6 Hz, 3H), 8.05 (d,  $J$  = 7.8 Hz, 1H), 8.25 (d,  $J$  = 7.5 Hz, 1H), 10.47 (s, 1H).  $^{13}\text{C}$  NMR (100 MHz,  $\text{CDCl}_3$ ):  $\delta$  (ppm) = 111.5, 118.1,

118.6, 120.3, 120.5, 122.4, 125.2, 126.1, 126.8, 128.4, 129.5, 130.9, 131.6, 139.2, 140.1, 140.4, 198.2. MS (ESI+)  $m/z$  = 272.1.

## References:

1. (a) Y. P Zhu, M. C Liu, Q Cai, F. C Jia and A. X. Wu, *Chem. Eur. J.*, 2013, **19**, 10132. (b) N. Battini, A. K. Padala, N. Mupparapu, R. A. Vishwakarma and Q. N. Ahmed, *RSC Adv.*, 2014, **4**, 26258.
2. A. R. Katritzky, G. W. Rewcastle and L. M. V. de Miguel, *J. Org. Chem.*, 1988, **53**, 794.

**<sup>1</sup>H NMR and <sup>13</sup>C NMR Spectra of Compounds:**

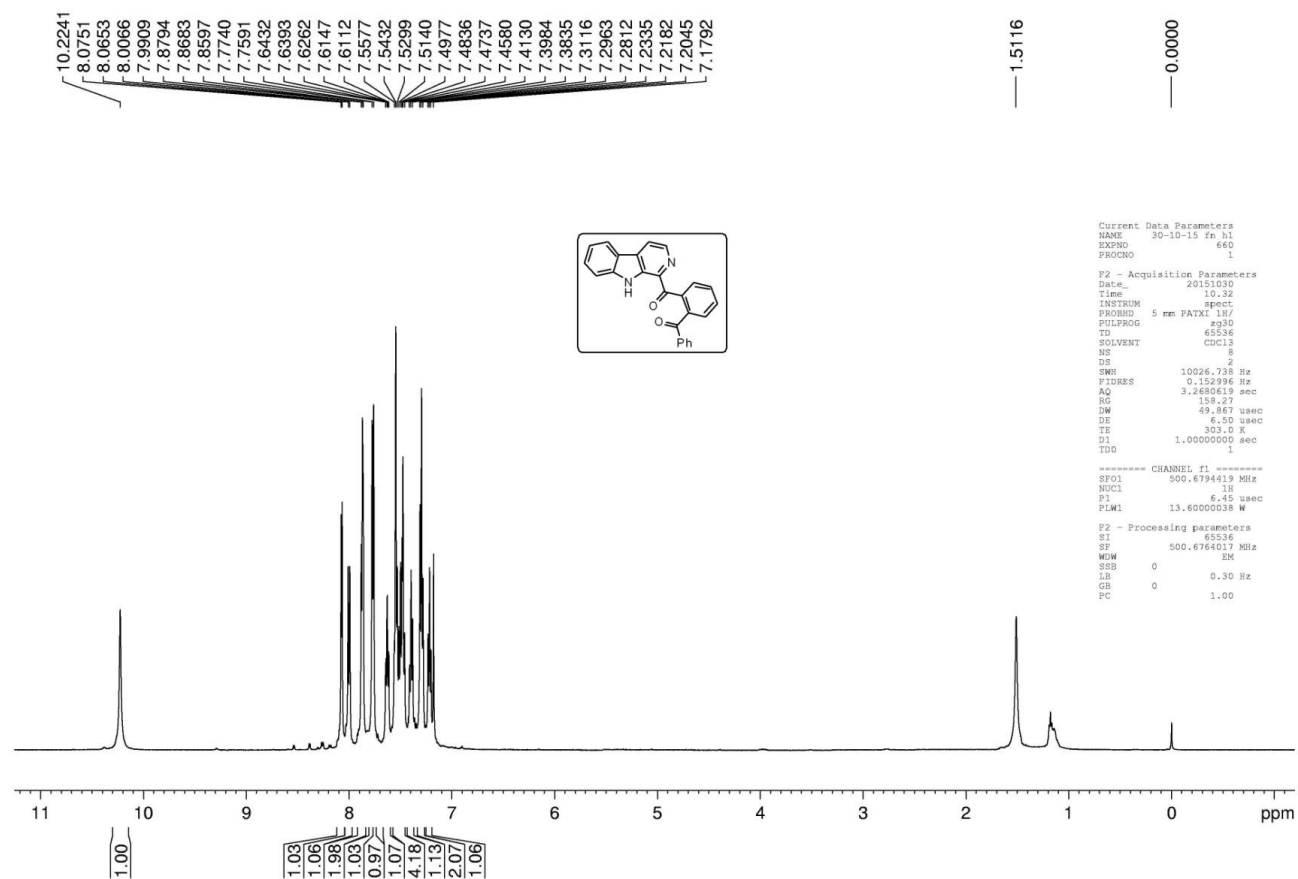

**Figure. S-1:** <sup>1</sup>H-NMR spectrum of (2-(9H-pyrido[3,4-b]indole-1-carbonyl)phenyl)(phenyl)methanone (**3aa**).



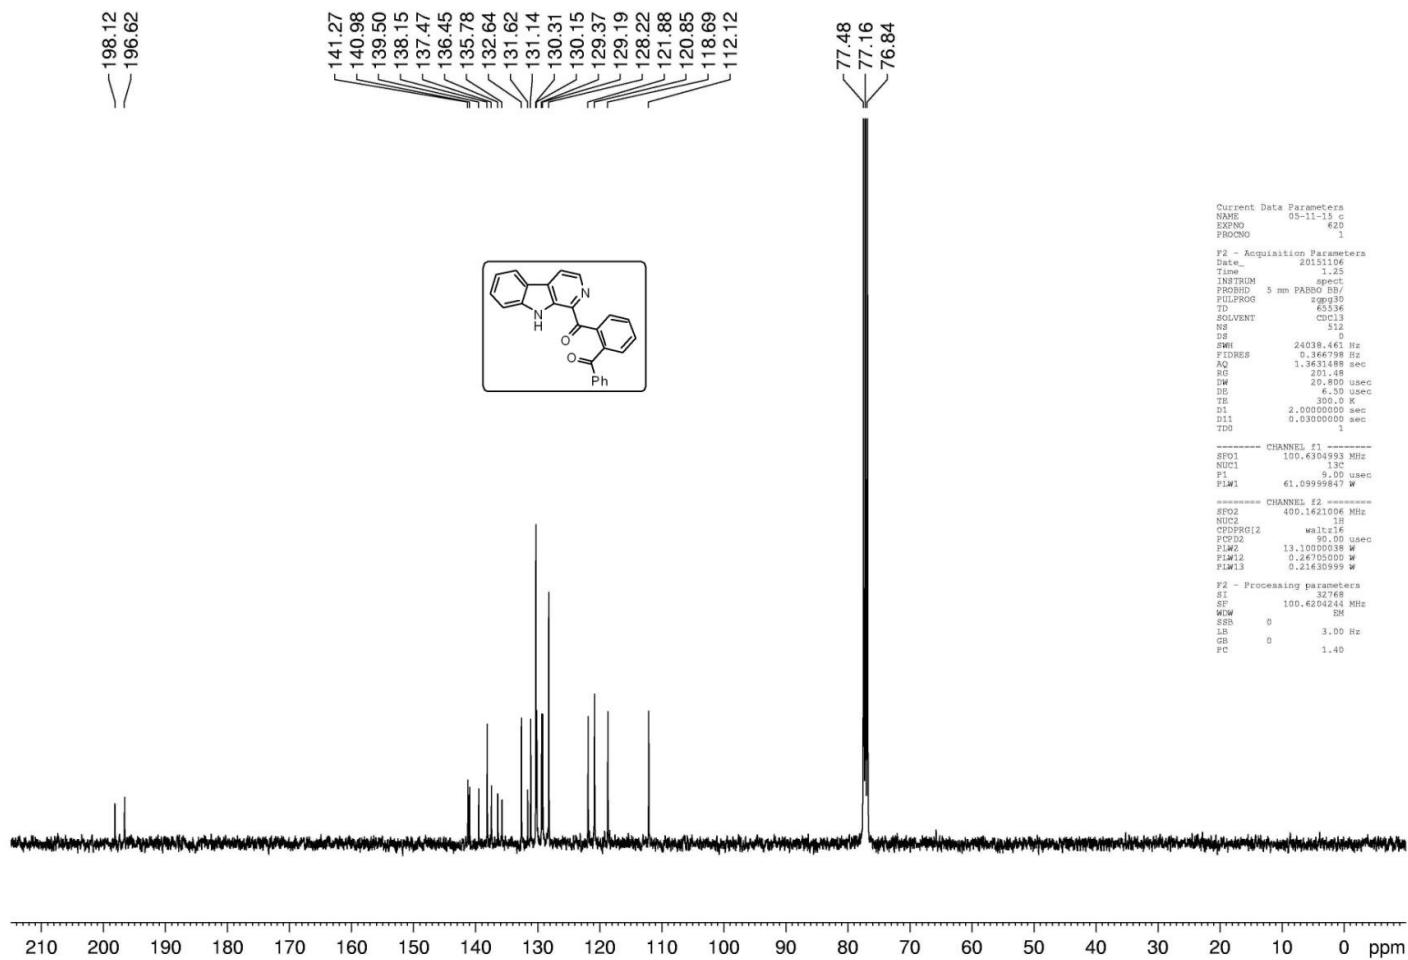

**Figure. S-2:** <sup>13</sup>C-NMR spectrum of (2-(9H-pyrido[3,4-b]indole-1-carbonyl)phenyl)(phenyl)methanone (**3aa**).

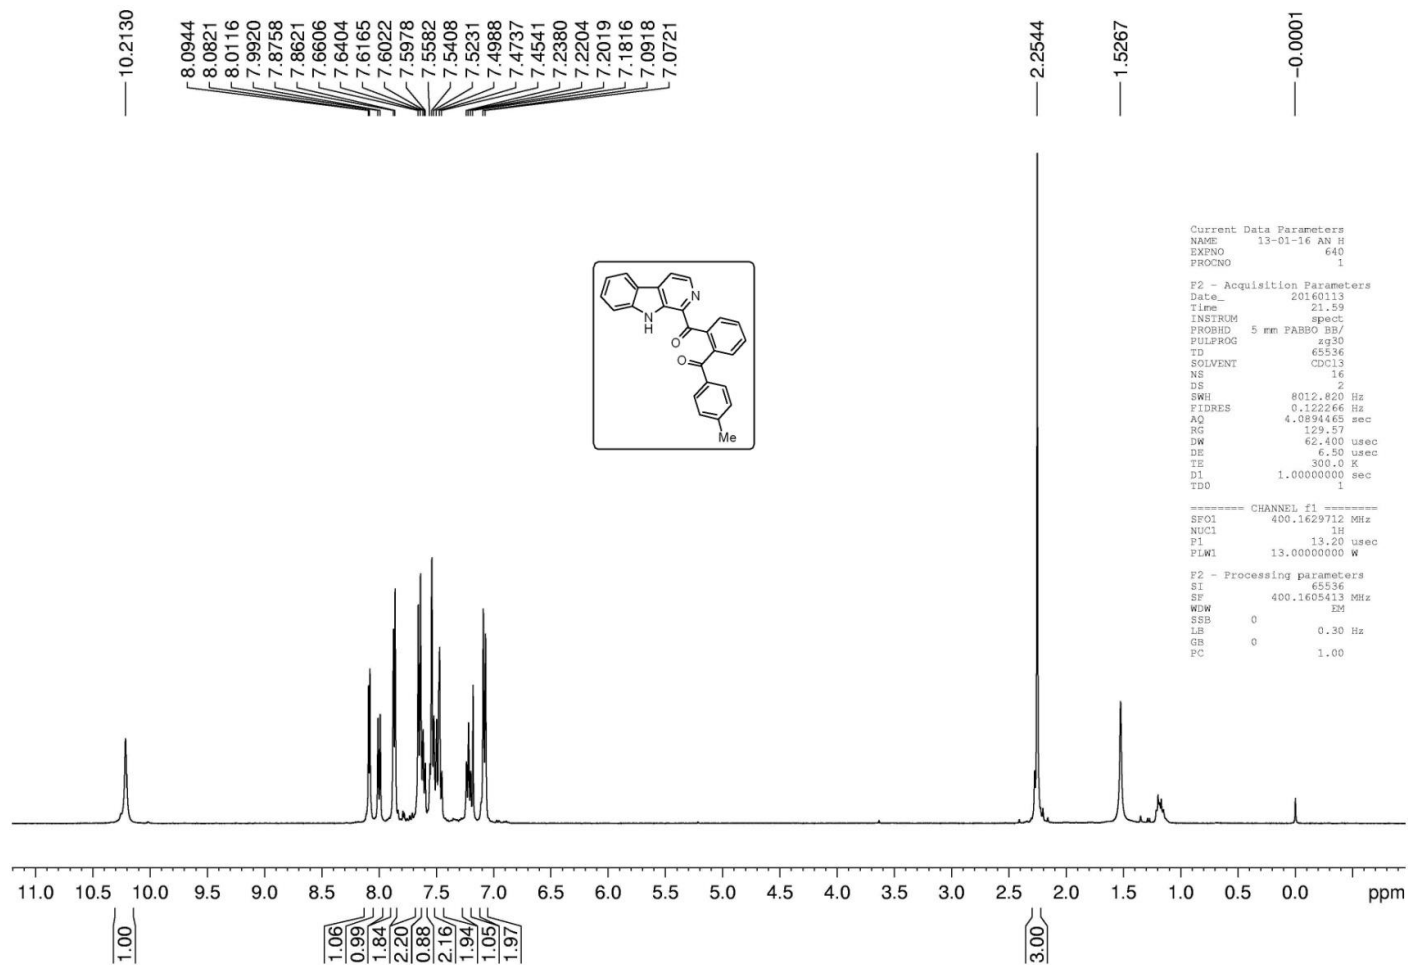

Figure. S-3:  $^1\text{H-NMR}$  spectrum of (2-(9H-pyrido[3,4-b]indole-1-carbonyl)phenyl)(p-tolyl)methanone (**3ab**).

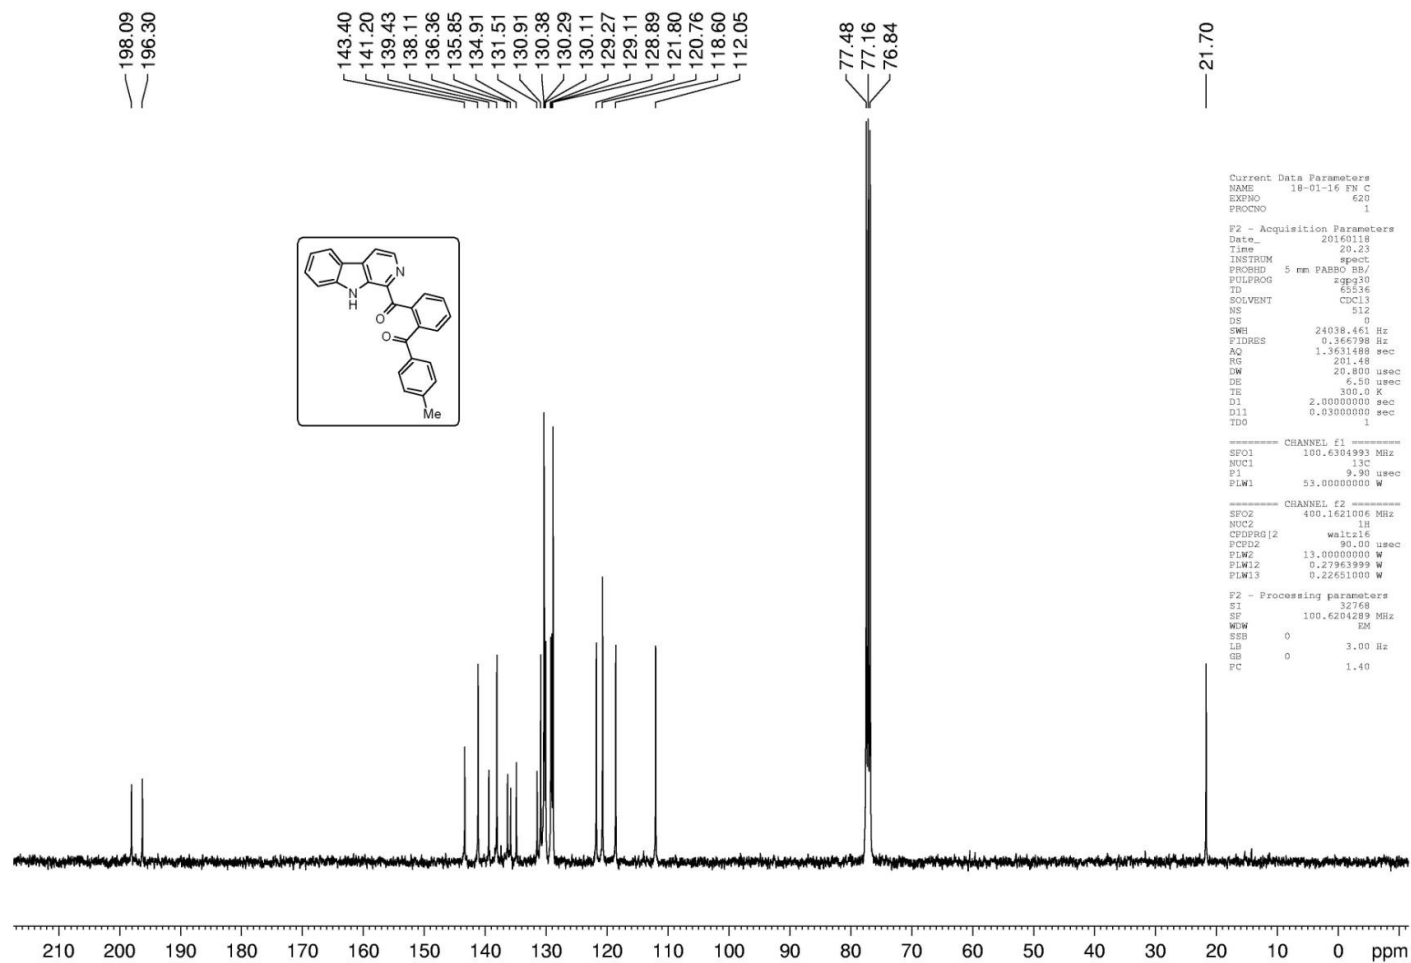

Figure. S-4: <sup>13</sup>C-NMR spectrum of (2-(9H-pyrido[3,4-b]indole-1-carbonyl)phenyl)(p-tolyl)methanone (**3ab**).

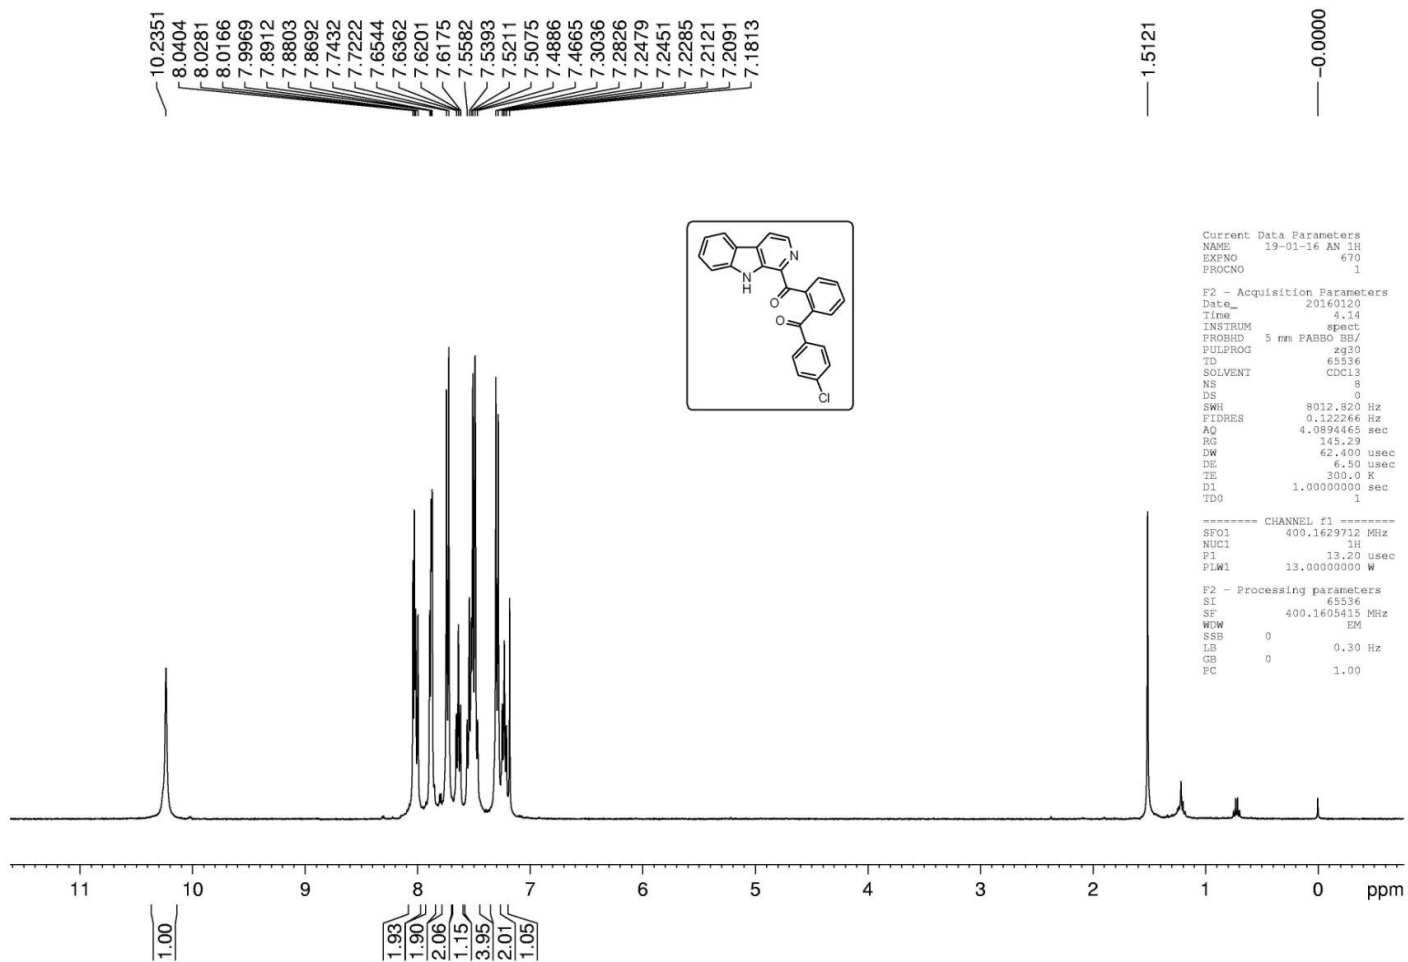

Figure. S-5: <sup>1</sup>H-NMR spectrum of (2-(9H-pyrido[3,4-b]indole-1-carbonyl)phenyl)(4-chlorophenyl)methanone (**3ac**).

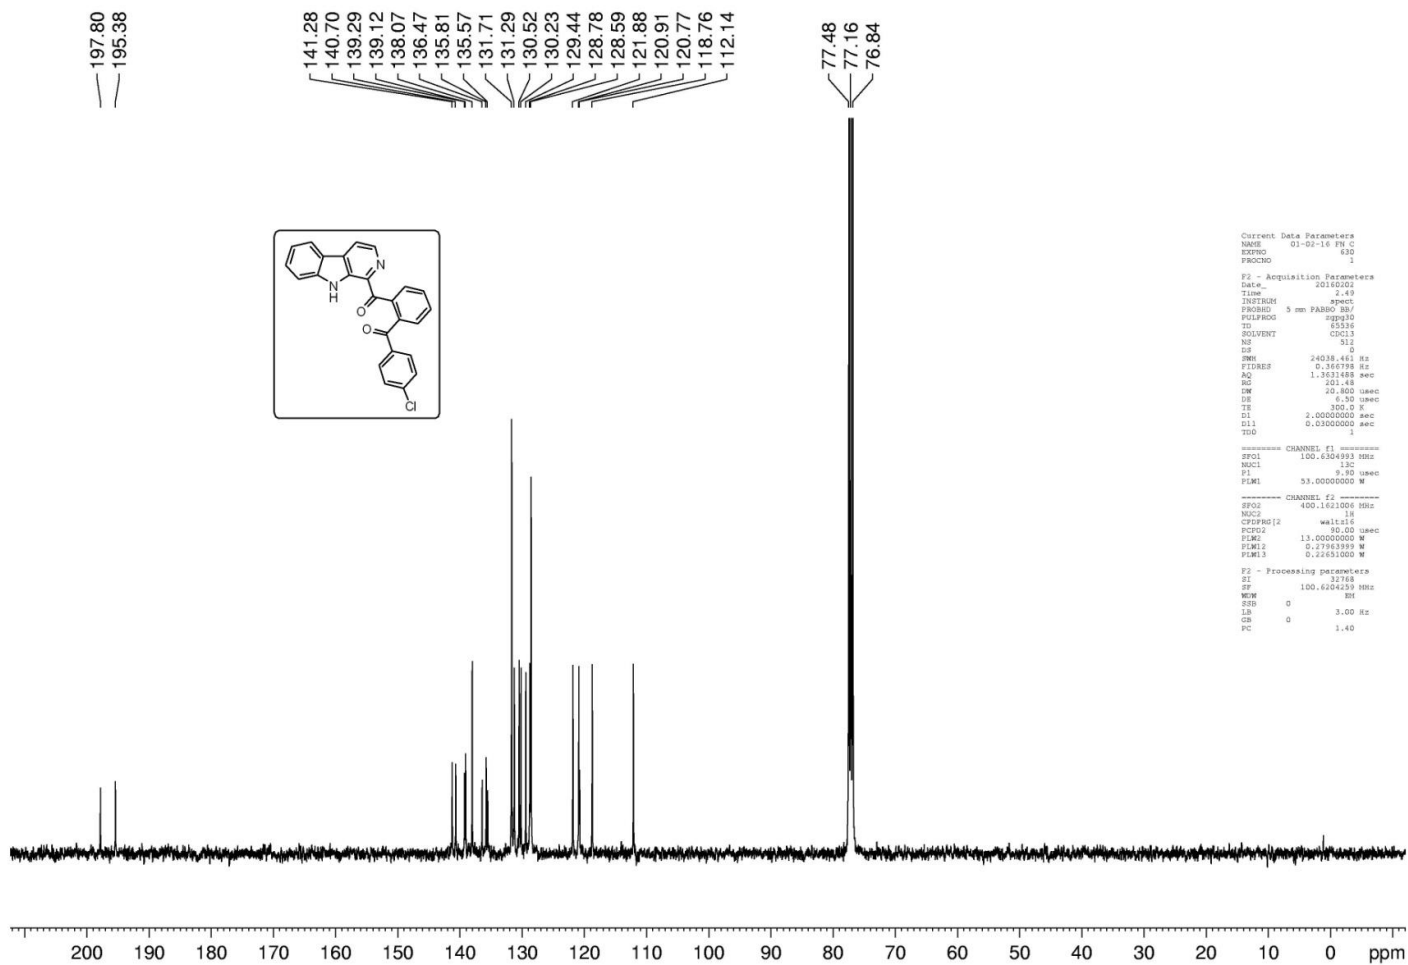

**Figure. S-6:** <sup>13</sup>C-NMR spectrum of (2-(9H-pyrido[3,4-b]indole-1-carbonyl)phenyl)(4-chlorophenyl)methanone (**3ac**).

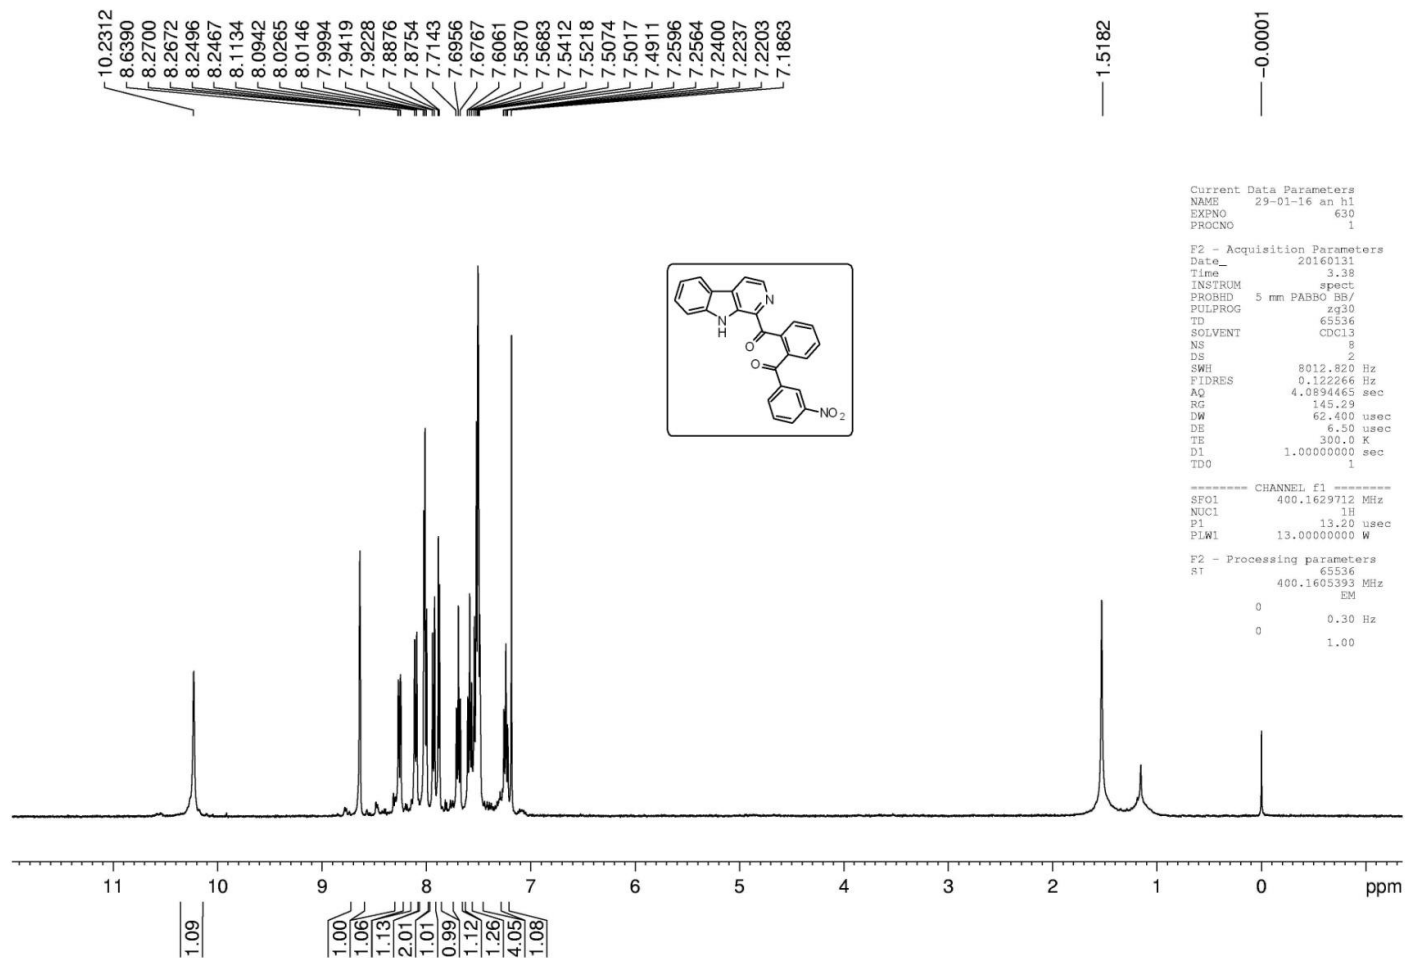

**Figure. S-7:**  $^1\text{H}$ -NMR spectrum of (2-(9H-pyrido[3,4-b]indole-1-carbonyl)phenyl)(3-nitrophenyl)methanone (**3ad**).

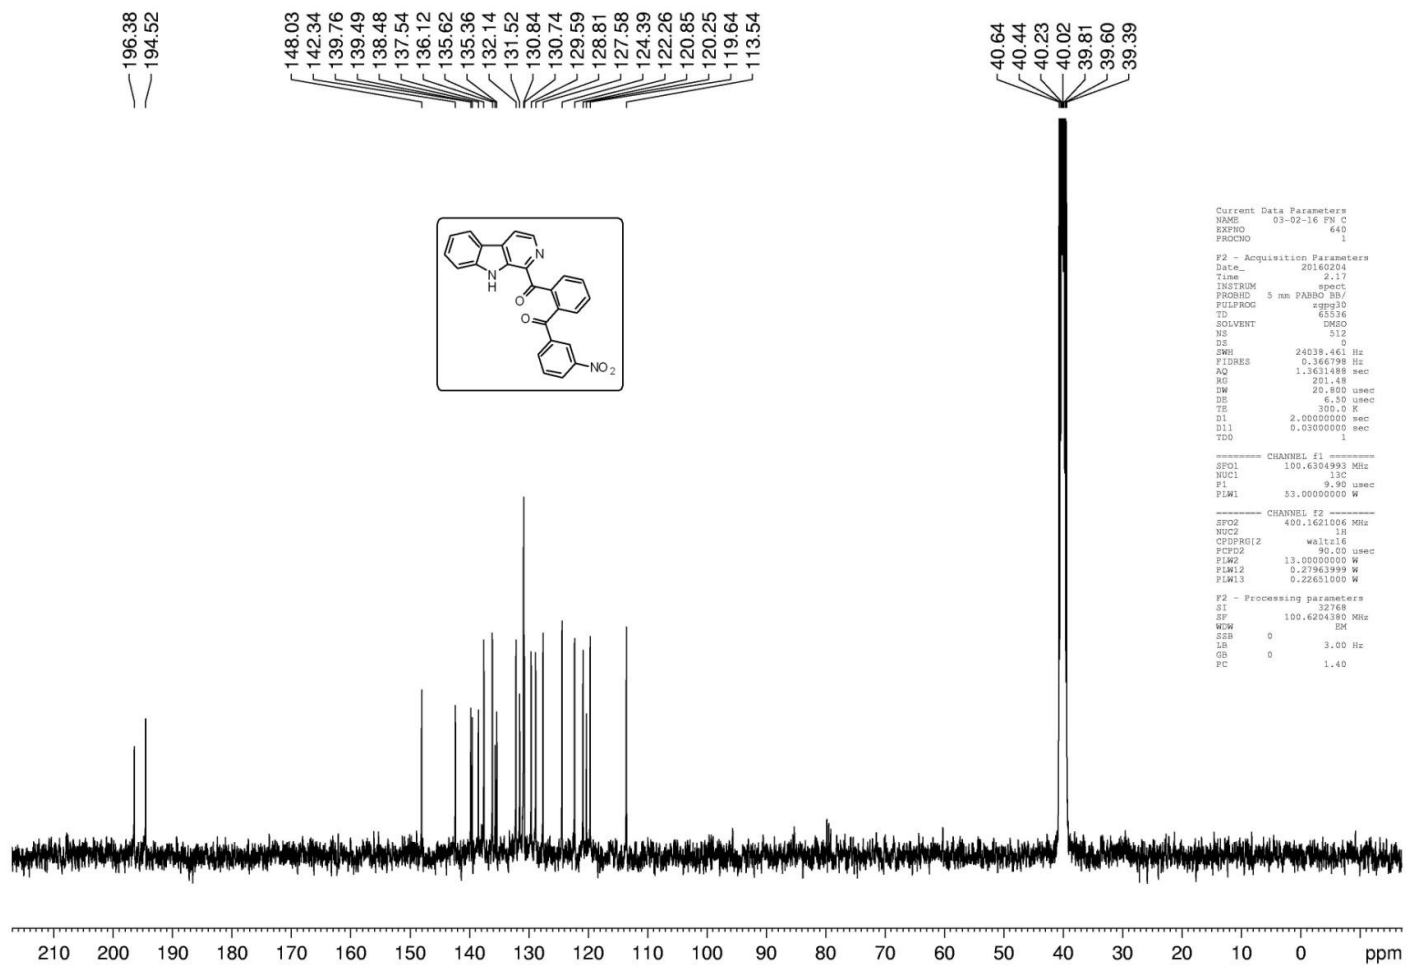

**Figure. S-8:** <sup>13</sup>C-NMR spectrum of (2-(9H-pyrido[3,4-b]indole-1-carbonyl)phenyl)(3-nitrophenyl)methanone (**3ad**).

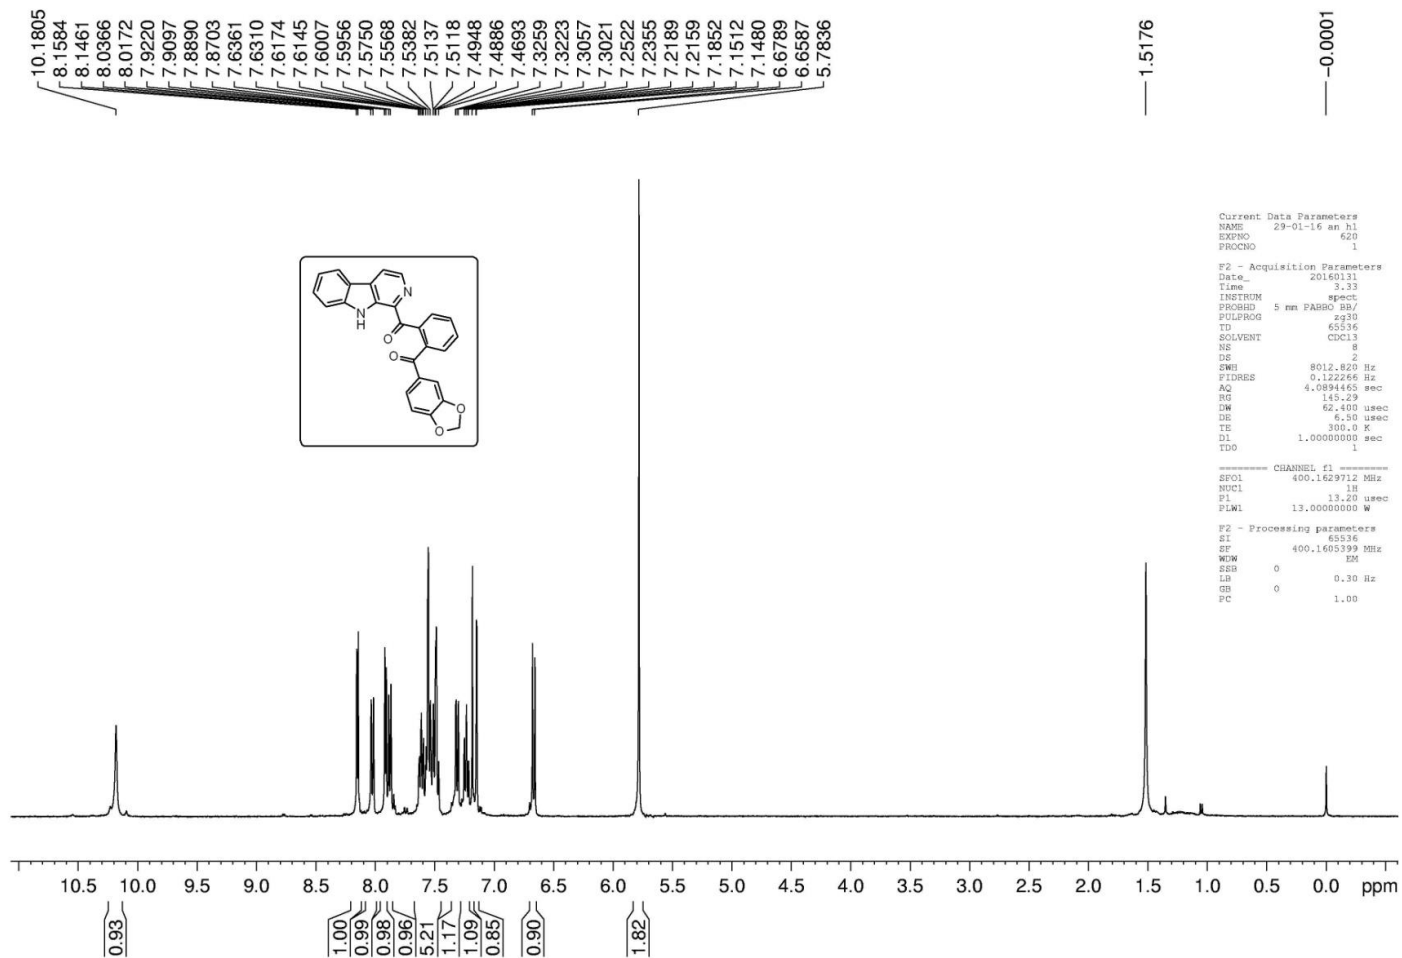

**Figure. S-9:**  $^1\text{H}$ -NMR spectrum of (2-(9H-pyrido[3,4-b]indole-1-carbonyl)phenyl)(benzo[d][1,3]dioxol-5-yl)methanone (**3ae**).



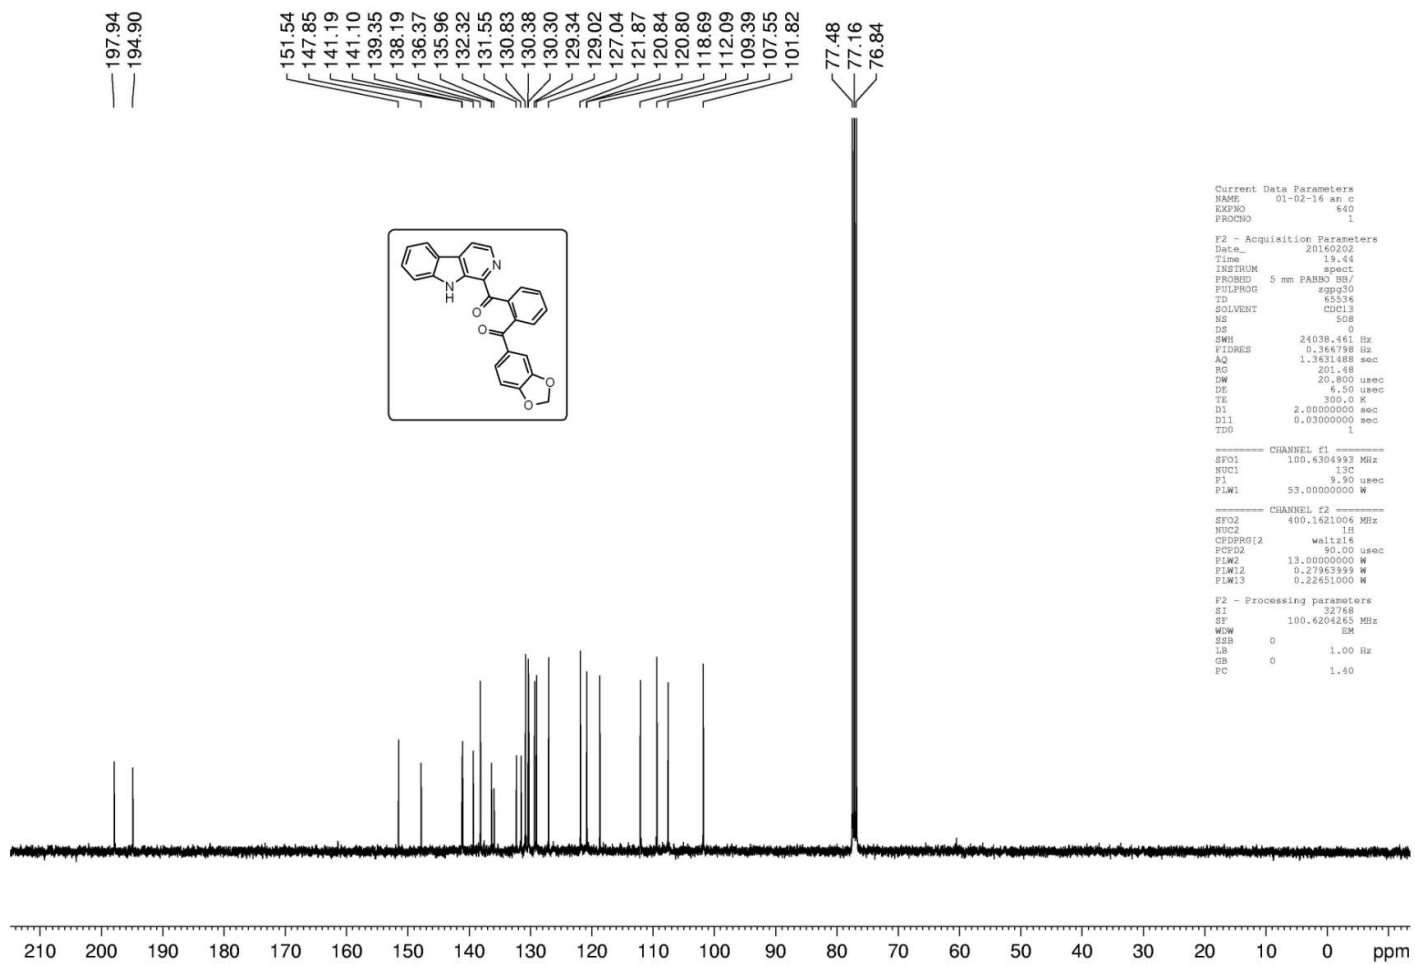

Figure. S-10:  $^{13}\text{C}$ -NMR spectrum of (2-(9H-pyrido[3,4-b]indole-1-carbonyl)phenyl)(benzo[d][1,3]dioxol-5-yl)methanone (**3ae**).

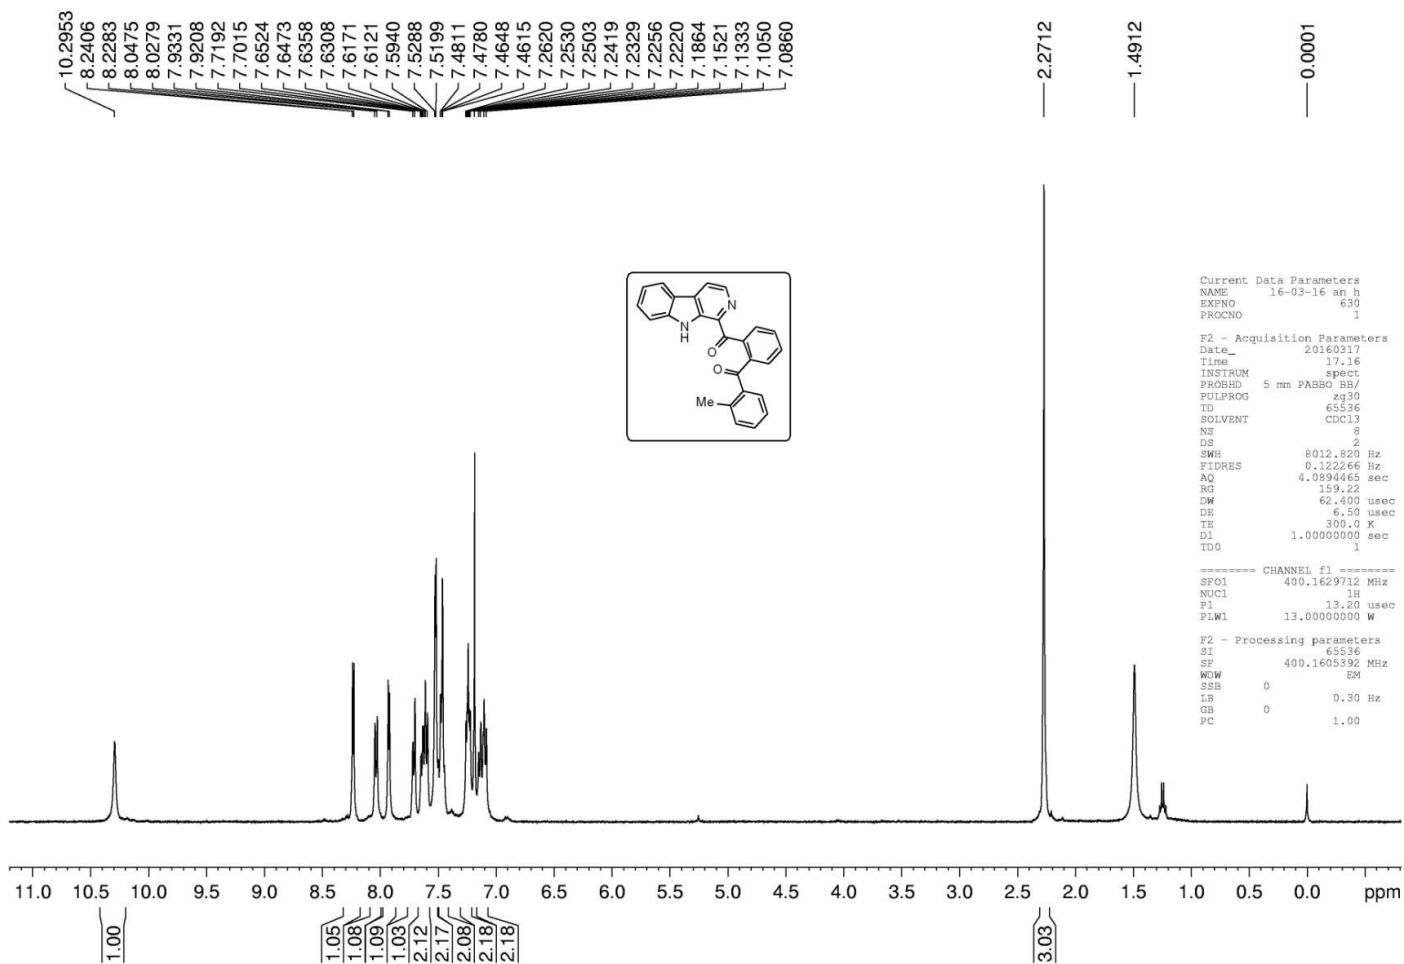

Figure. S-11:  $^1\text{H}$ -NMR spectrum of (2-(9H-pyrido[3,4-b]indole-1-carbonyl)phenyl)(o-tolyl)methanone (**3af**).

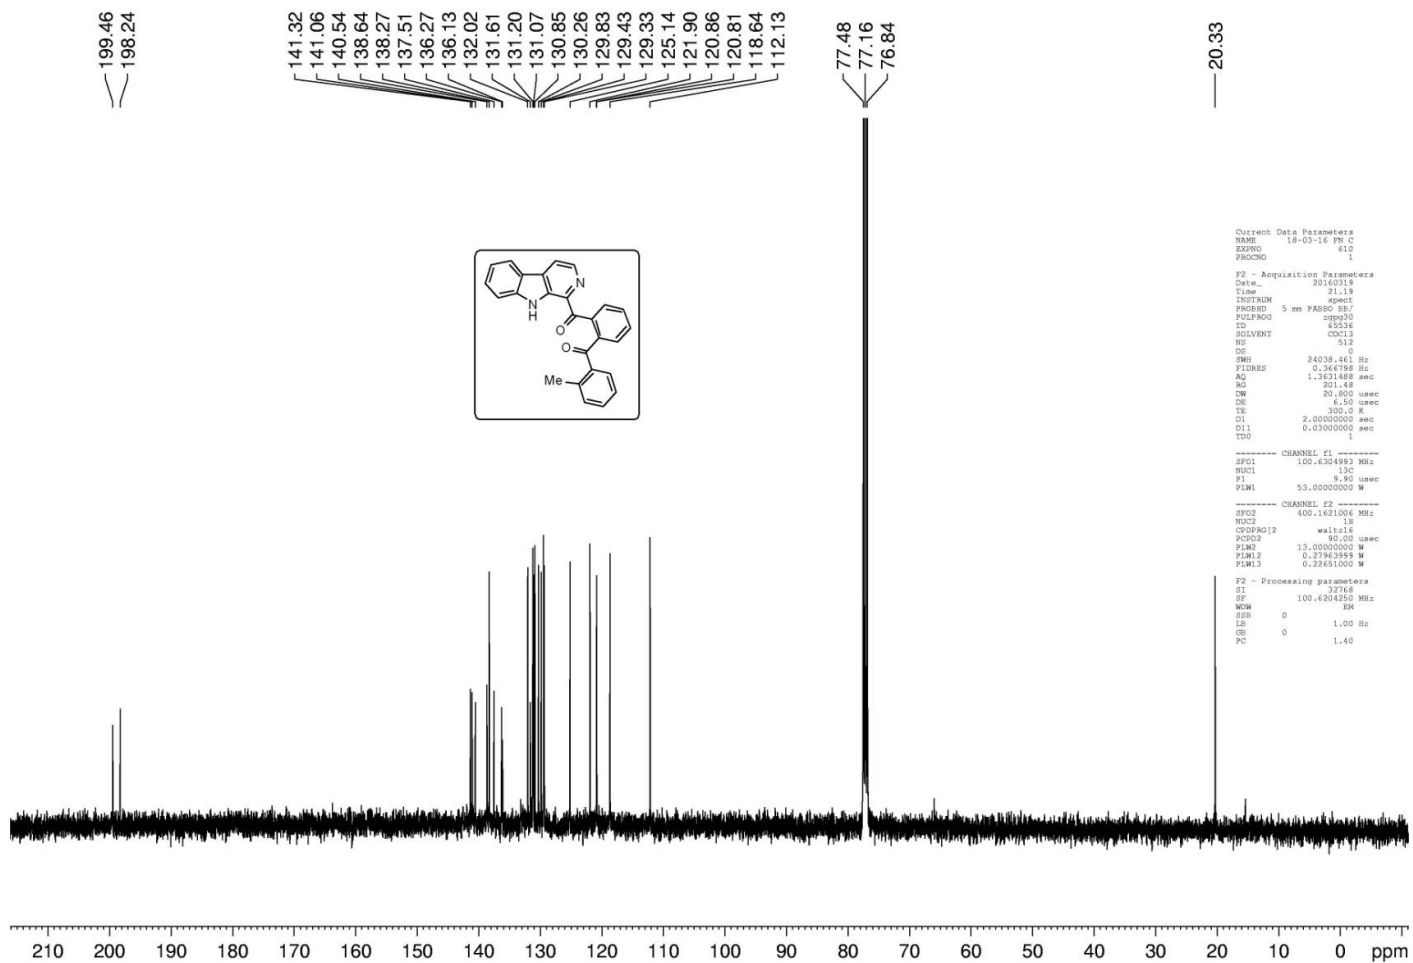

**Figure. S-12:**  $^{13}\text{C}$ -NMR spectrum of (2-(9H-pyrido[3,4-b]indole-1-carbonyl)phenyl)(o-tolyl)methanone (**3af**).

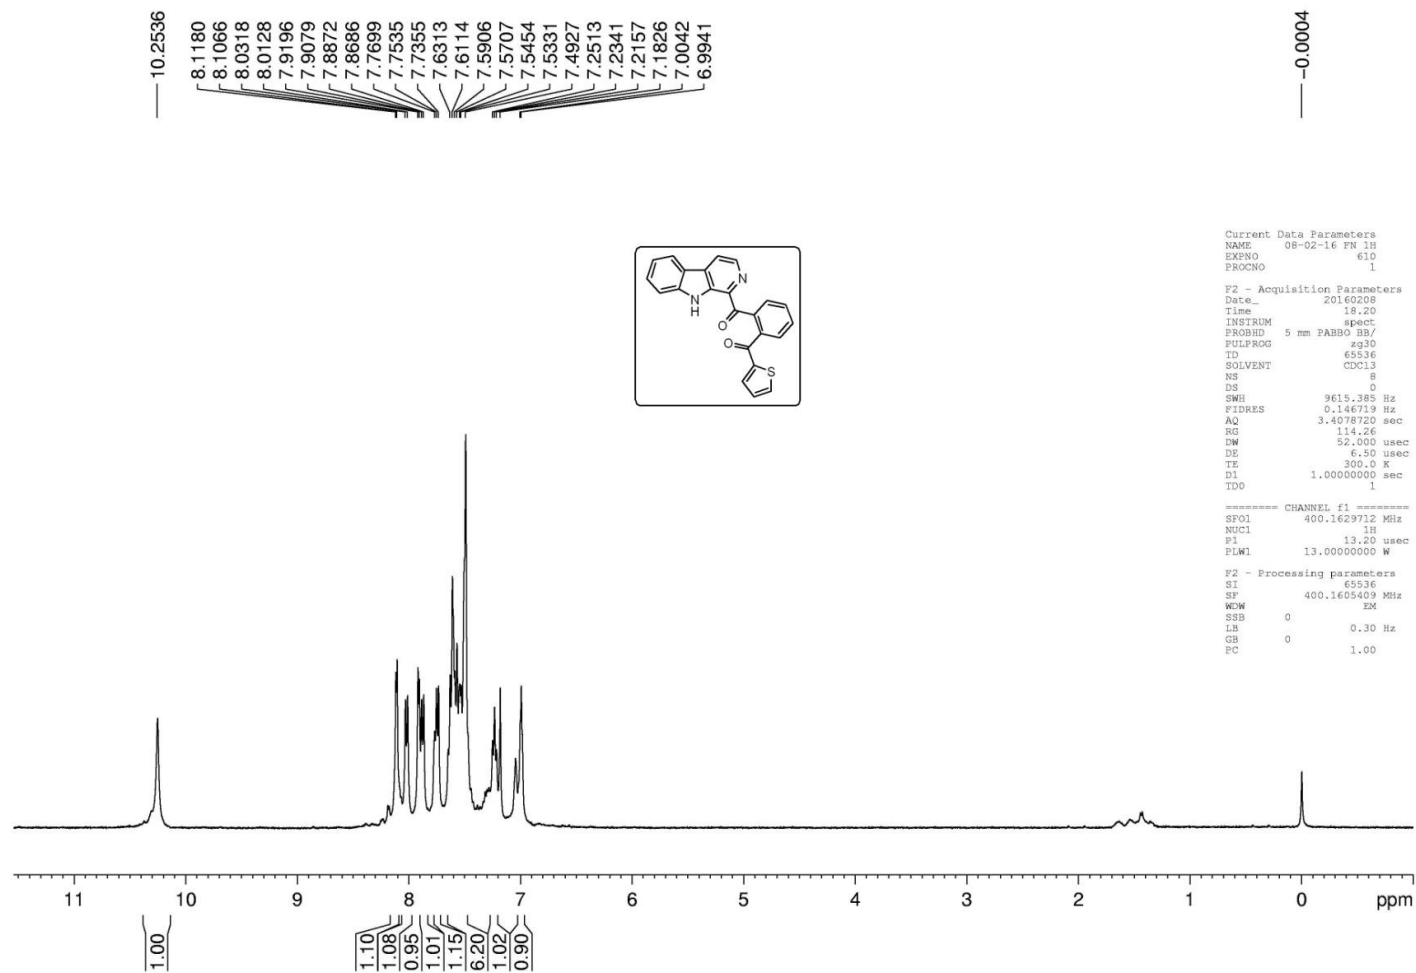

Figure. S-13:  $^1\text{H}$ -NMR spectrum of (2-(9H-pyrido[3,4-b]indole-1-carbonyl)phenyl)(thiophen-2-yl)methanone (**3ag**).

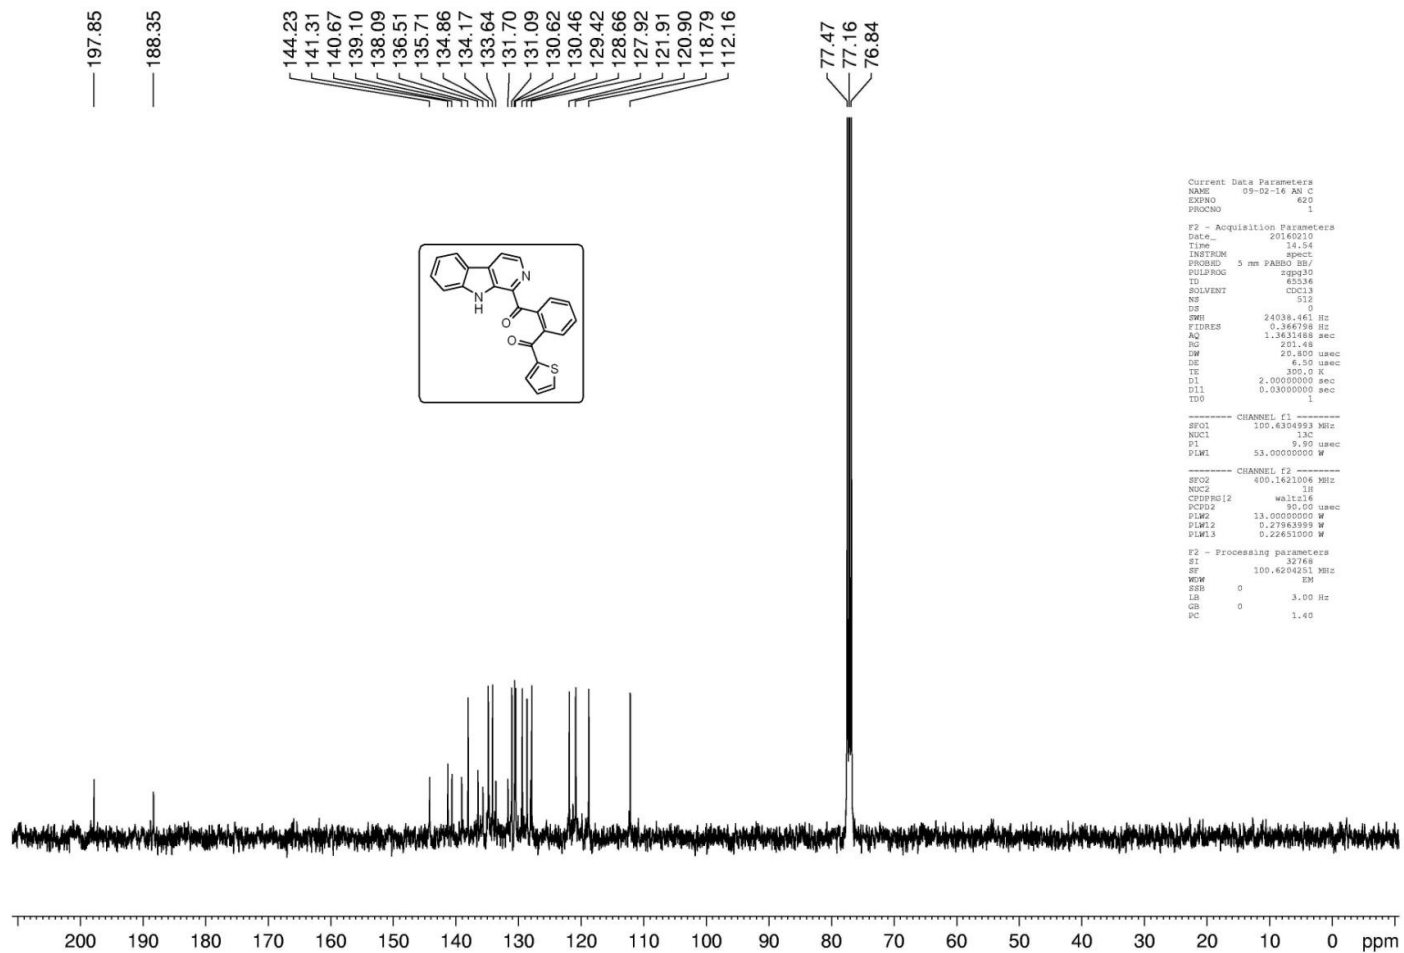

Figure. S-14: <sup>13</sup>C-NMR spectrum of (2-(9H-pyrido[3,4-b]indole-1-carbonyl)phenyl)(thiophen-2-yl)methanone (**3ag**).

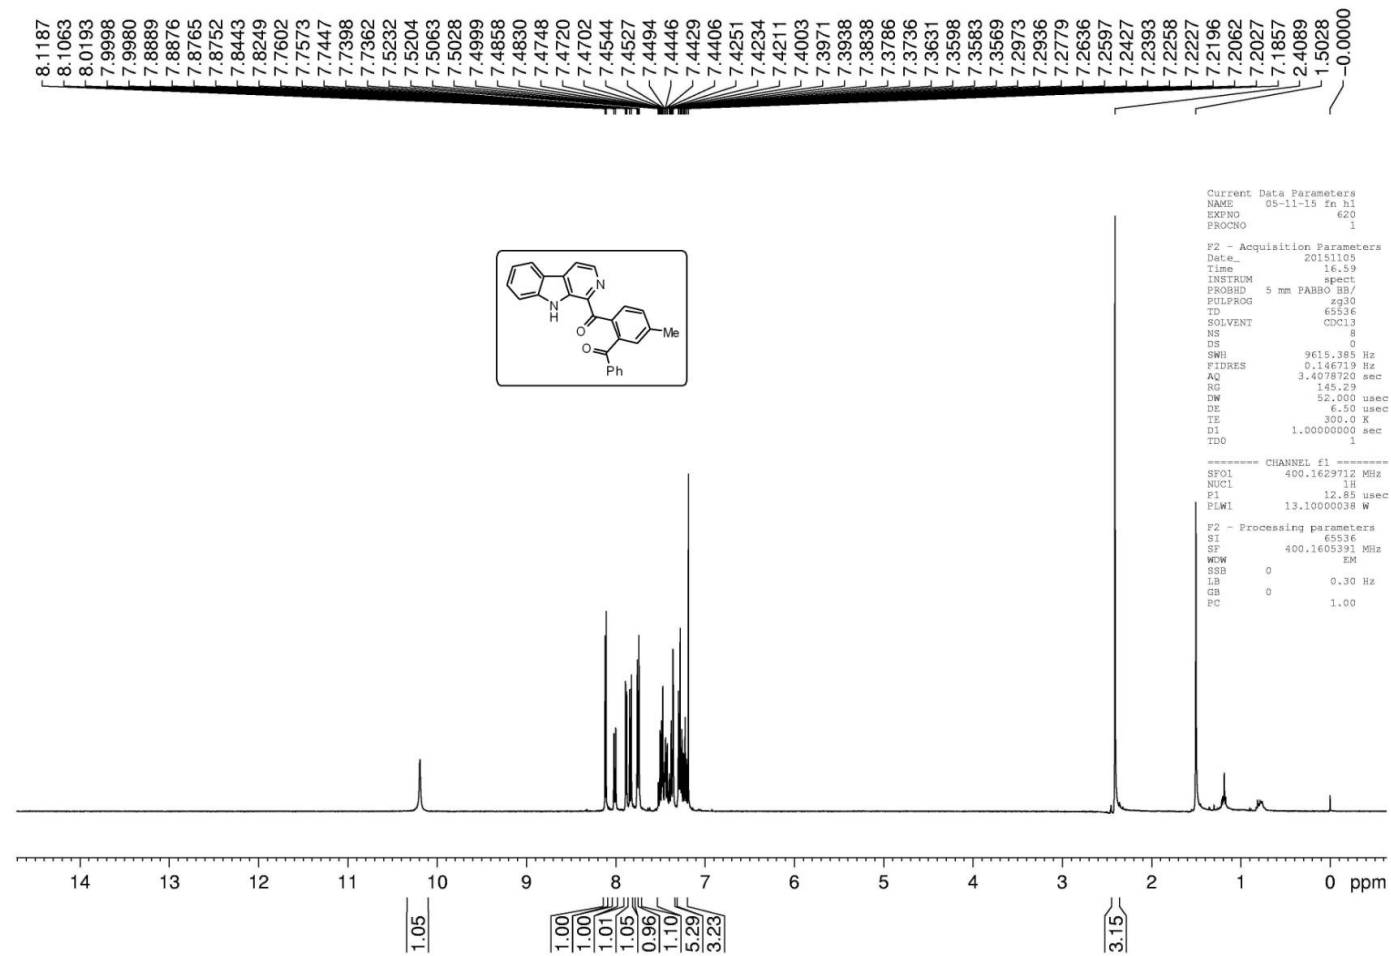

Figure. S-15:  $^1\text{H}$ -NMR spectrum of (2-Benzoyl-4-methylphenyl)(9H-pyrido[3,4-b]indol-1-yl)methanone (**3ba**).

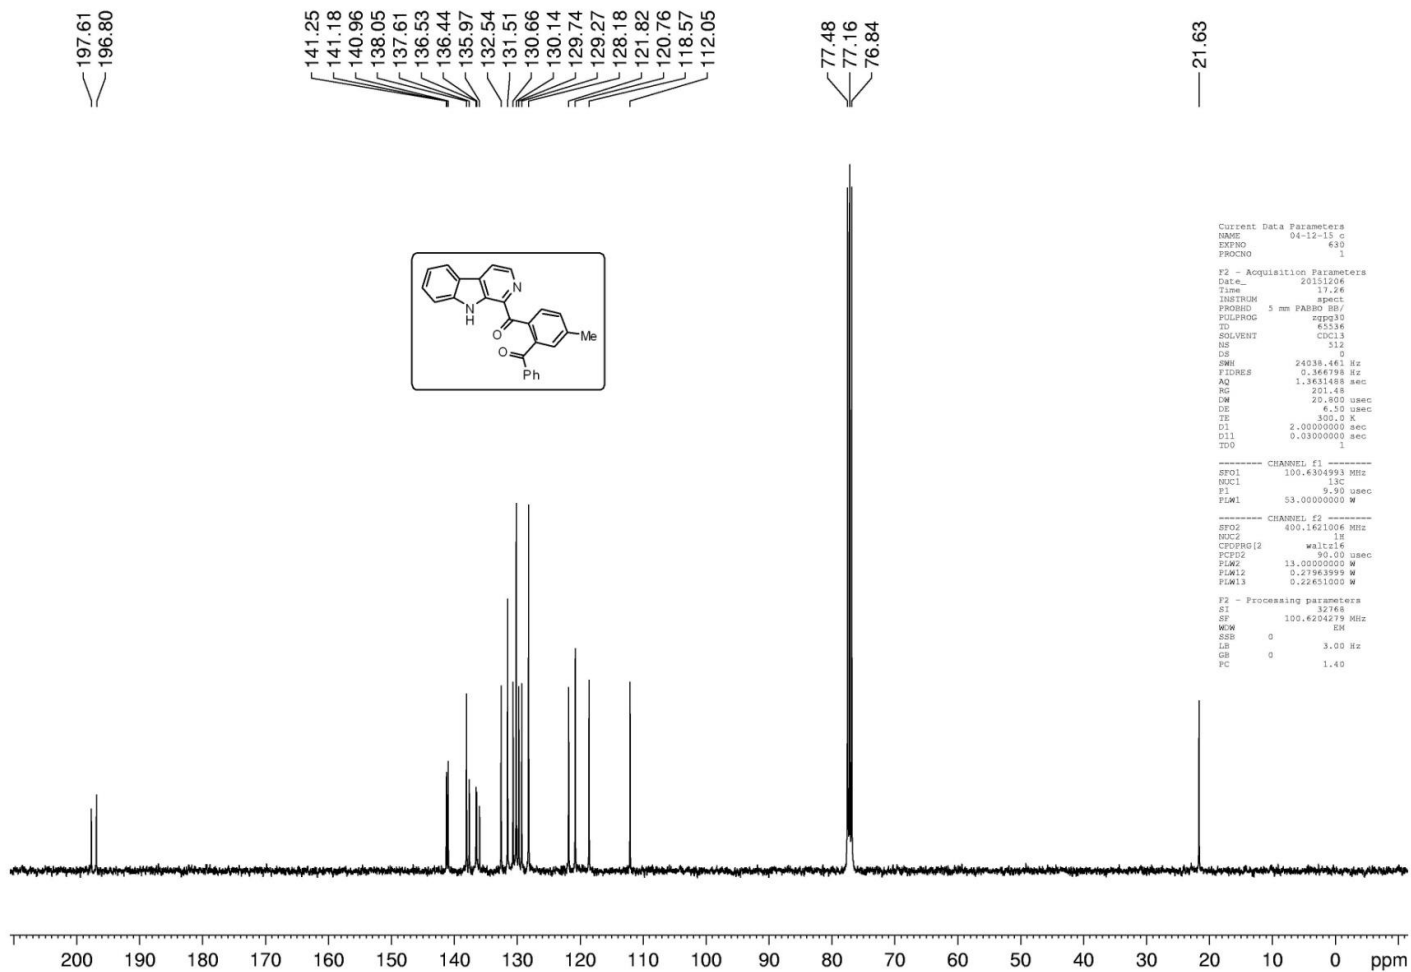

Figure. S-16: <sup>13</sup>C-NMR spectrum of (2-Benzoyl-4-methylphenyl)(9H-pyrido[3,4-b]indol-1-yl)methanone (3ba).

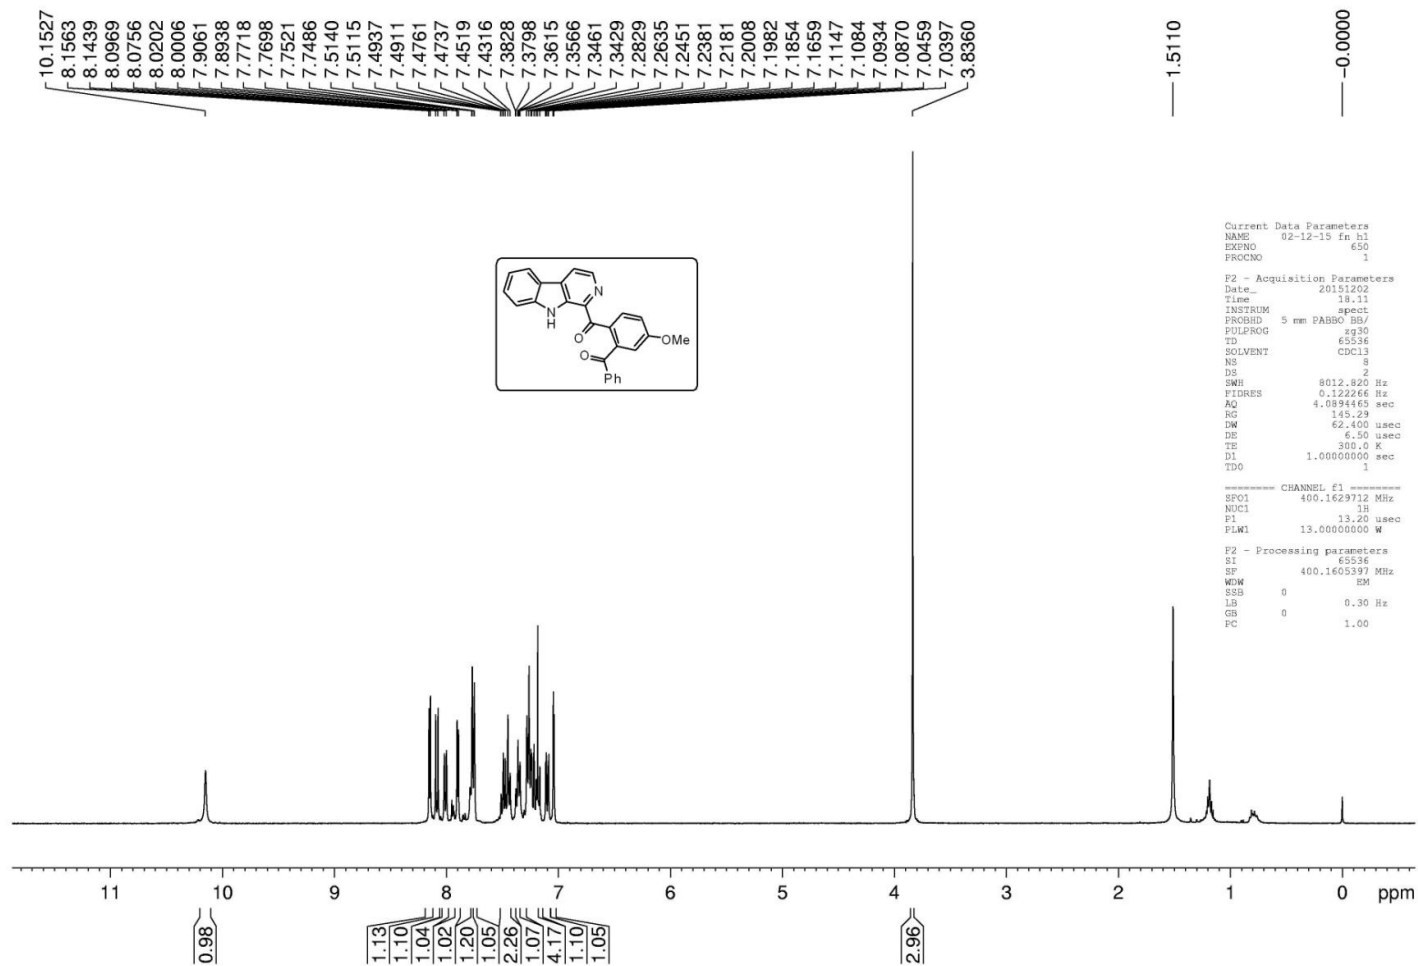

**Figure. S-17:**  $^1\text{H-NMR}$  spectrum of (2-Benzoyl-4-methoxyphenyl)(9H-pyrido[3,4-b]indol-1-yl)methanone (**3ca**).



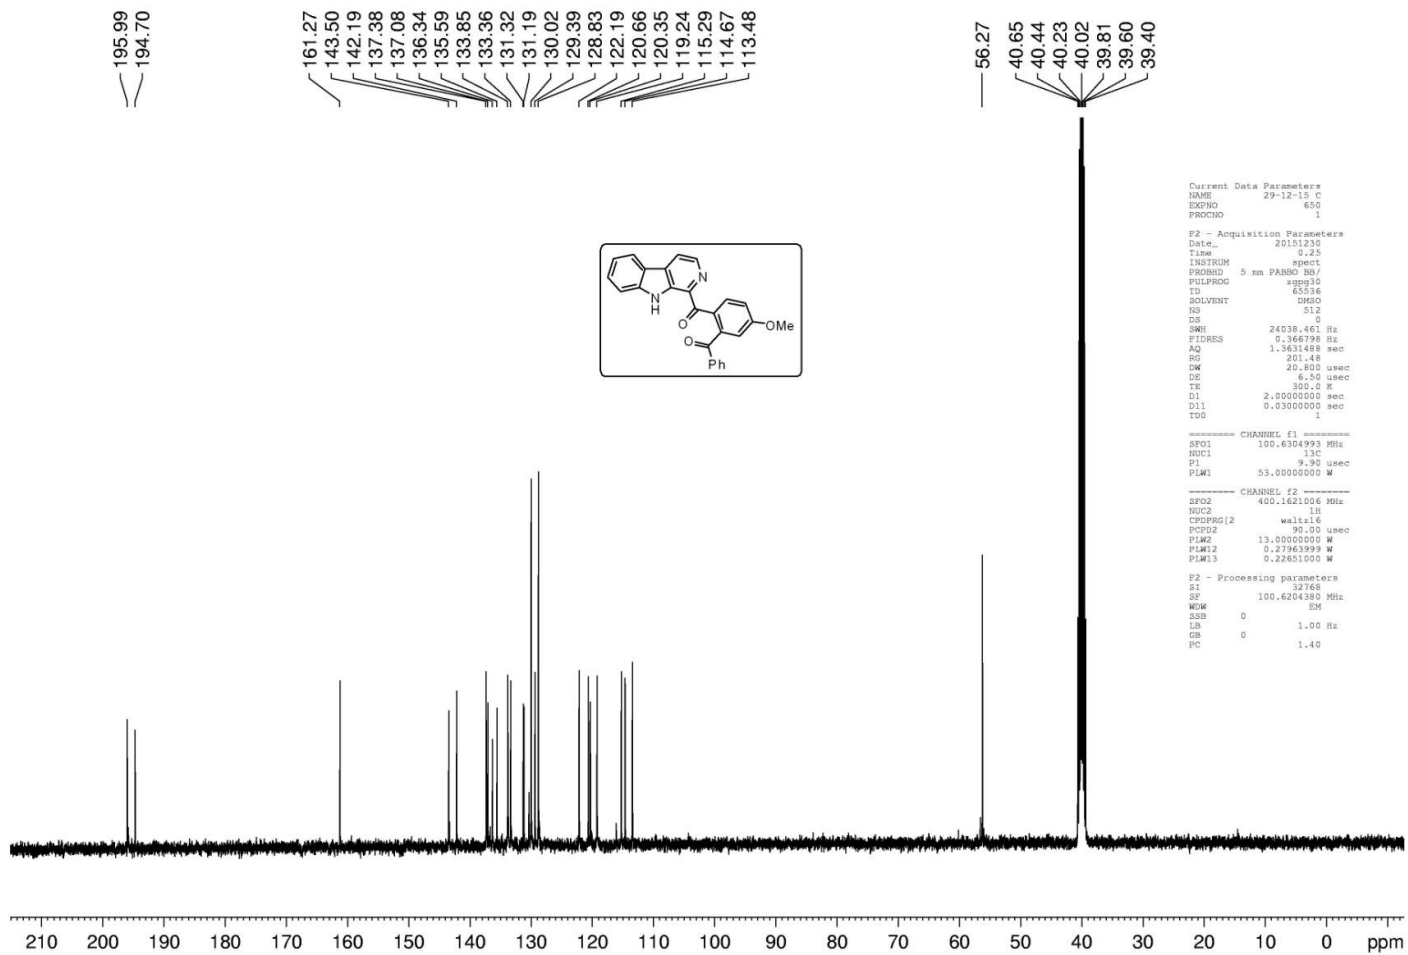

Figure. S-18: <sup>13</sup>C-NMR spectrum of (2-Benzoyl-4-methoxyphenyl)(9H-pyrido[3,4-b]indol-1-yl)methanone (3ca).

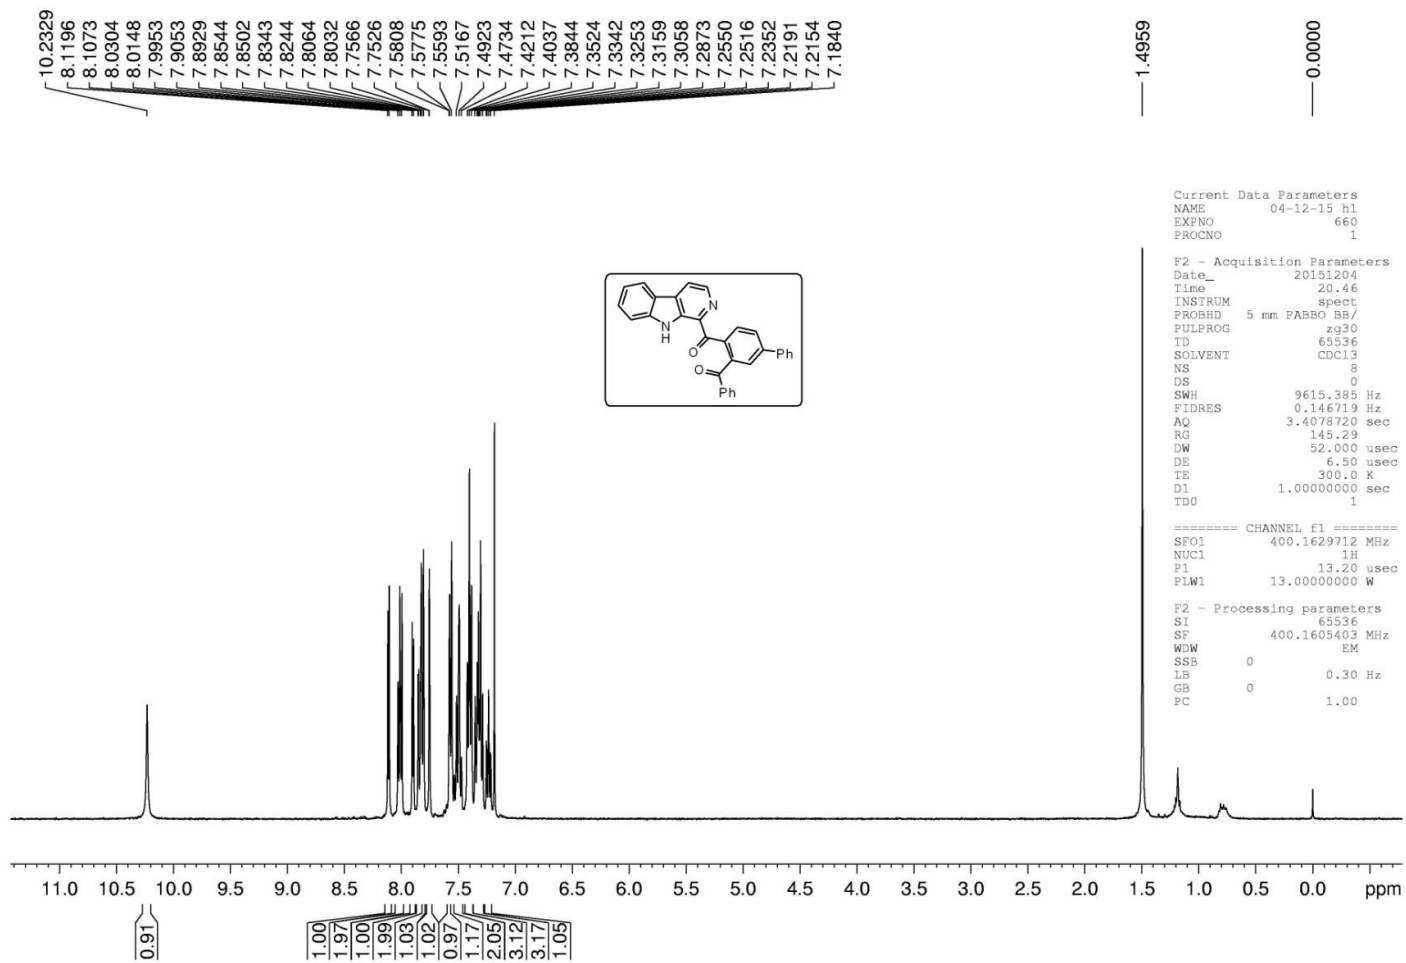

Figure. S-19: <sup>1</sup>H-NMR spectrum of (4-(9H-pyrido[3,4-b]indole-1-carbonyl)-[1,1'-biphenyl]-3-yl)(phenyl)methanone (**3da**).

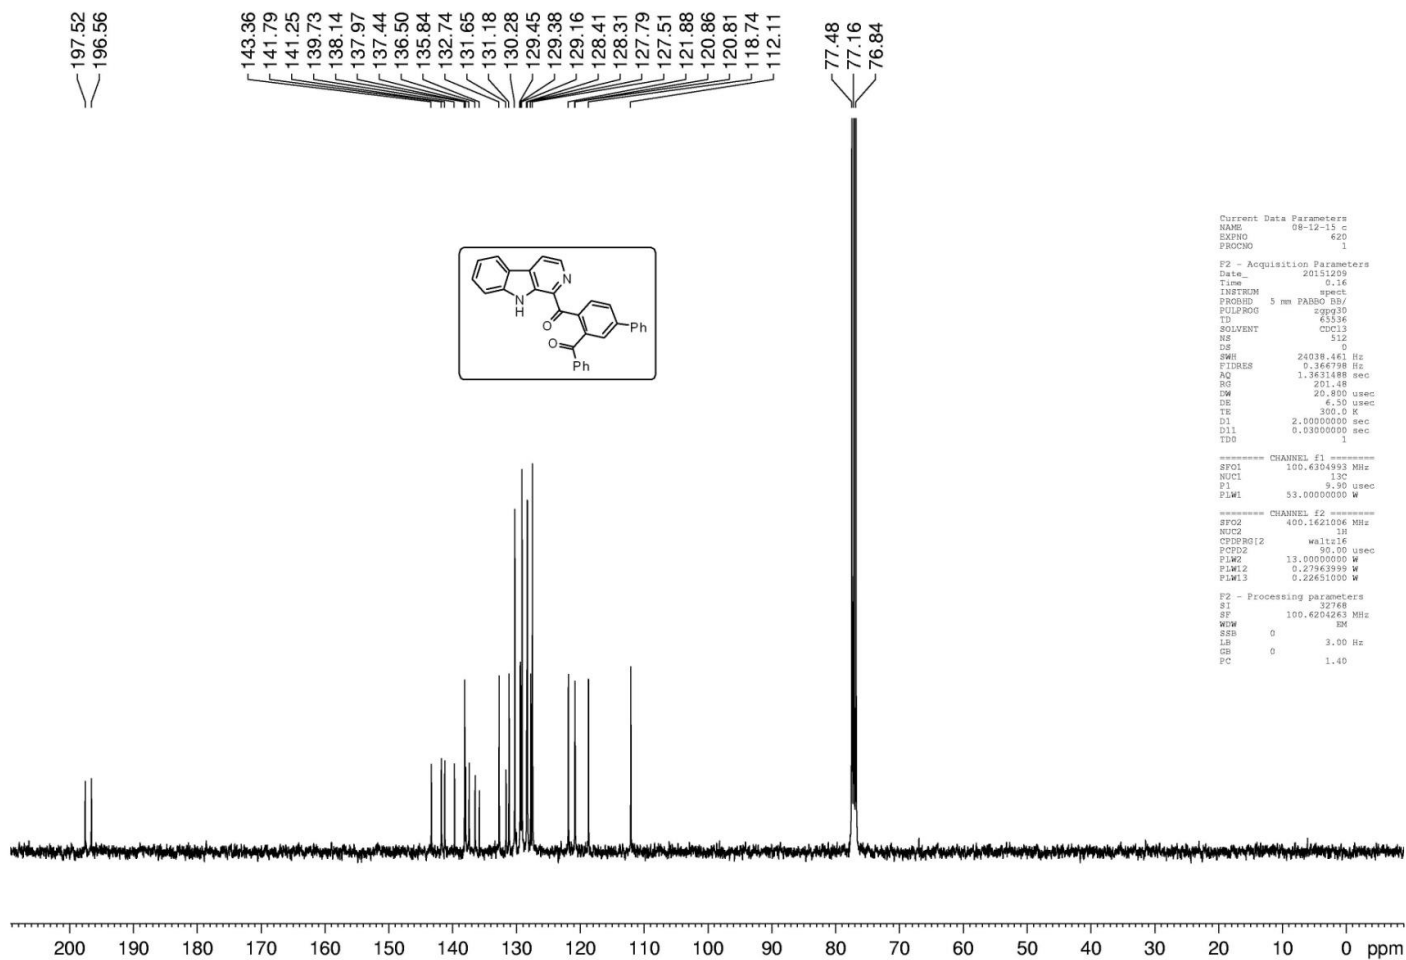

Figure. S-20: <sup>13</sup>C-NMR spectrum of (4-(9H-pyrido[3,4-b]indole-1-carbonyl)-[1,1'-biphenyl]-3-yl)(phenyl)methanone (**3da**).

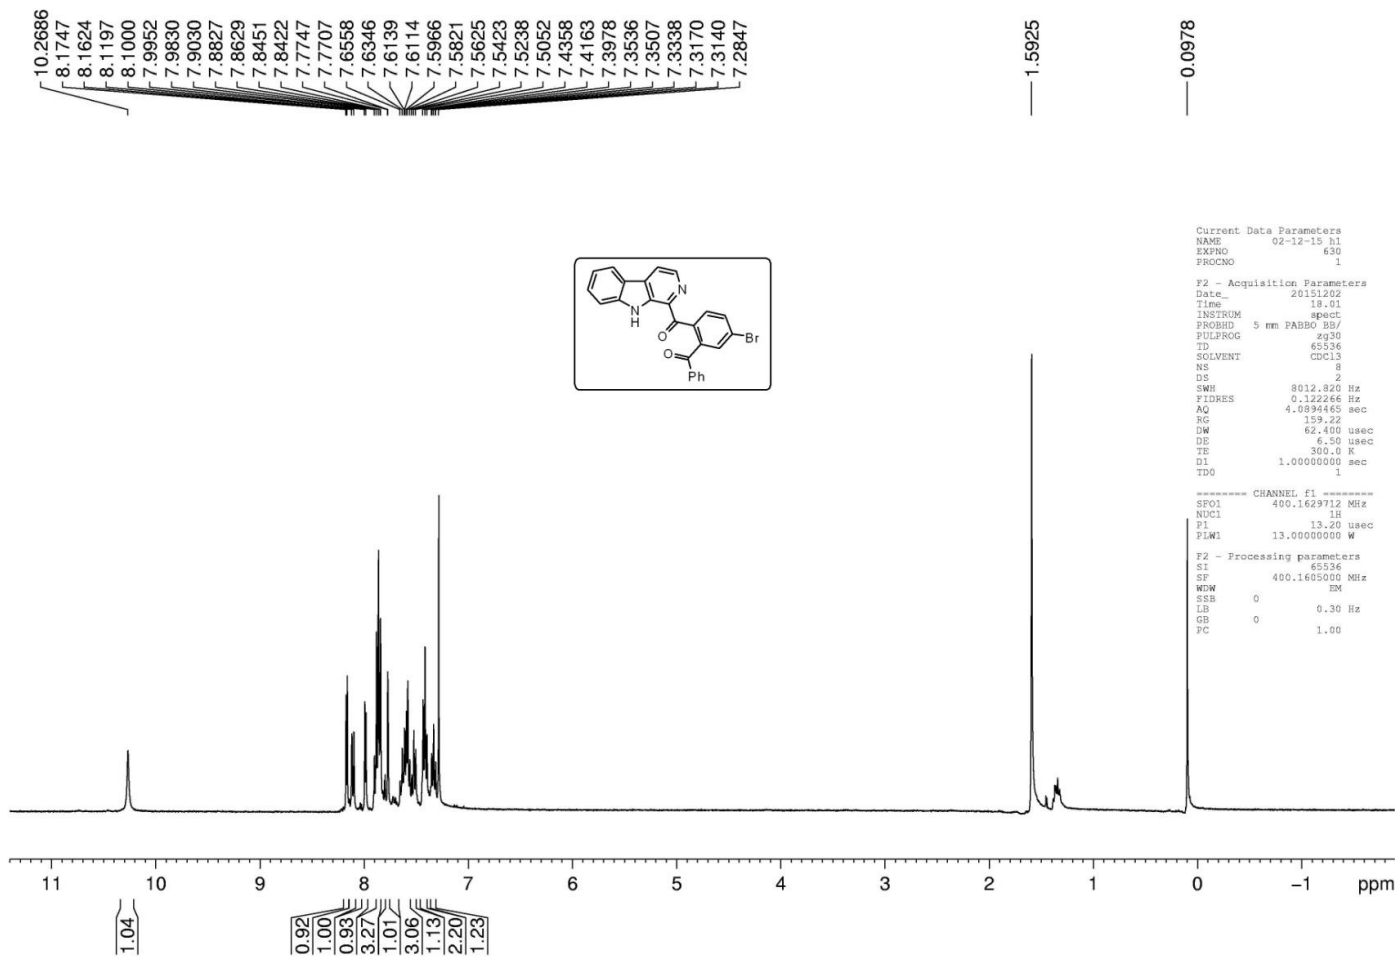

Figure. S-21: <sup>1</sup>H-NMR spectrum of (2-Benzoyl-4-bromophenyl)(9H-pyrido[3,4-b]indol-1-yl)methanone (3ea).

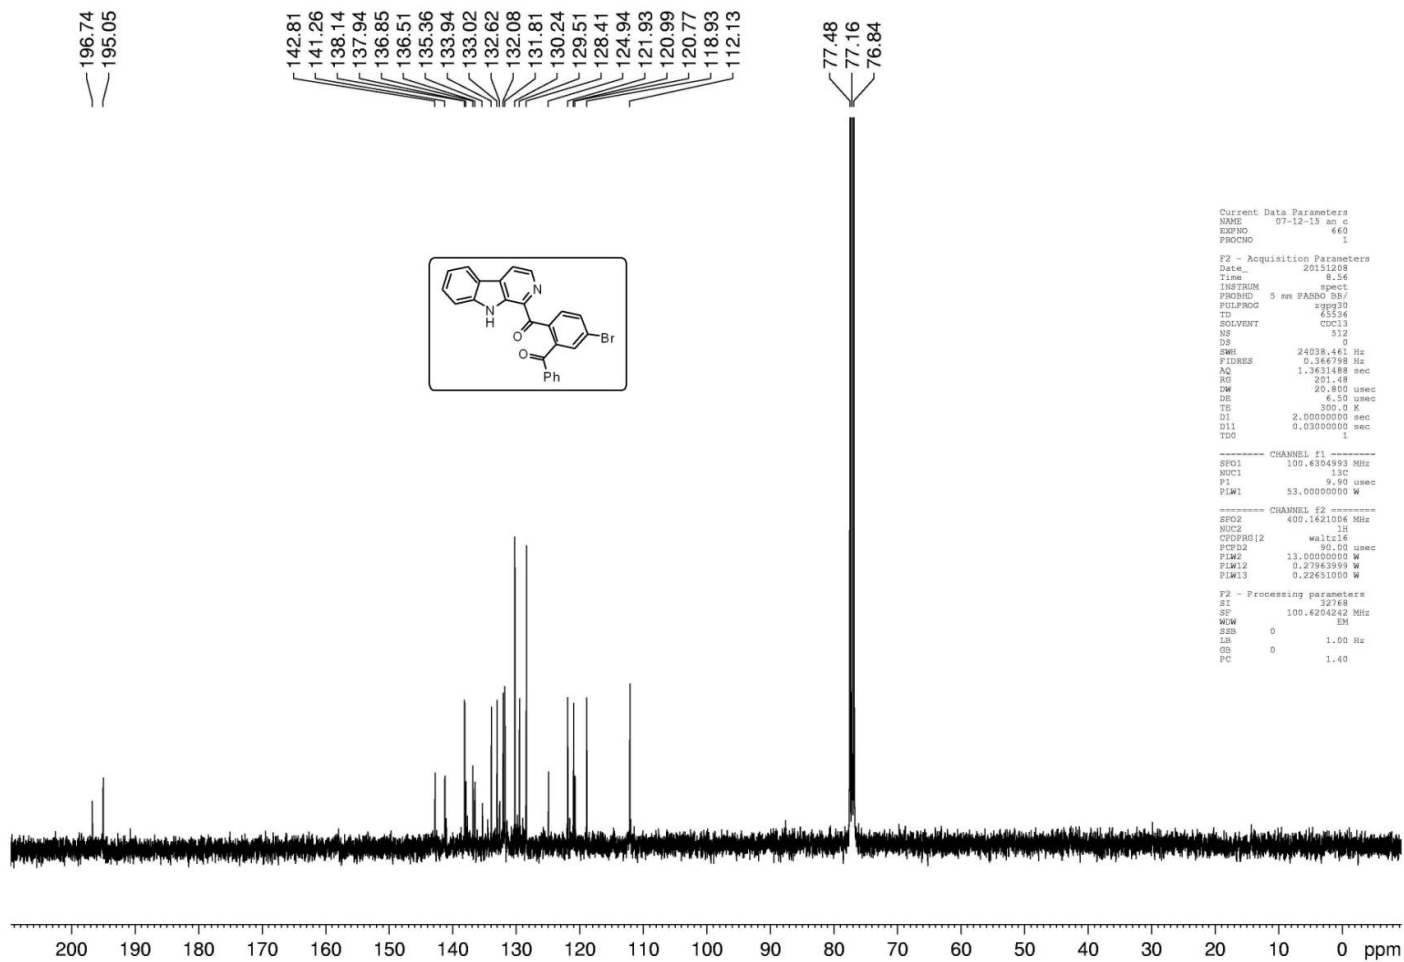

Figure. S-22: <sup>13</sup>C-NMR spectrum of (2-Benzoyl-4-bromophenyl)(9H-pyrido[3,4-b]indol-1-yl)methanone (3ea).

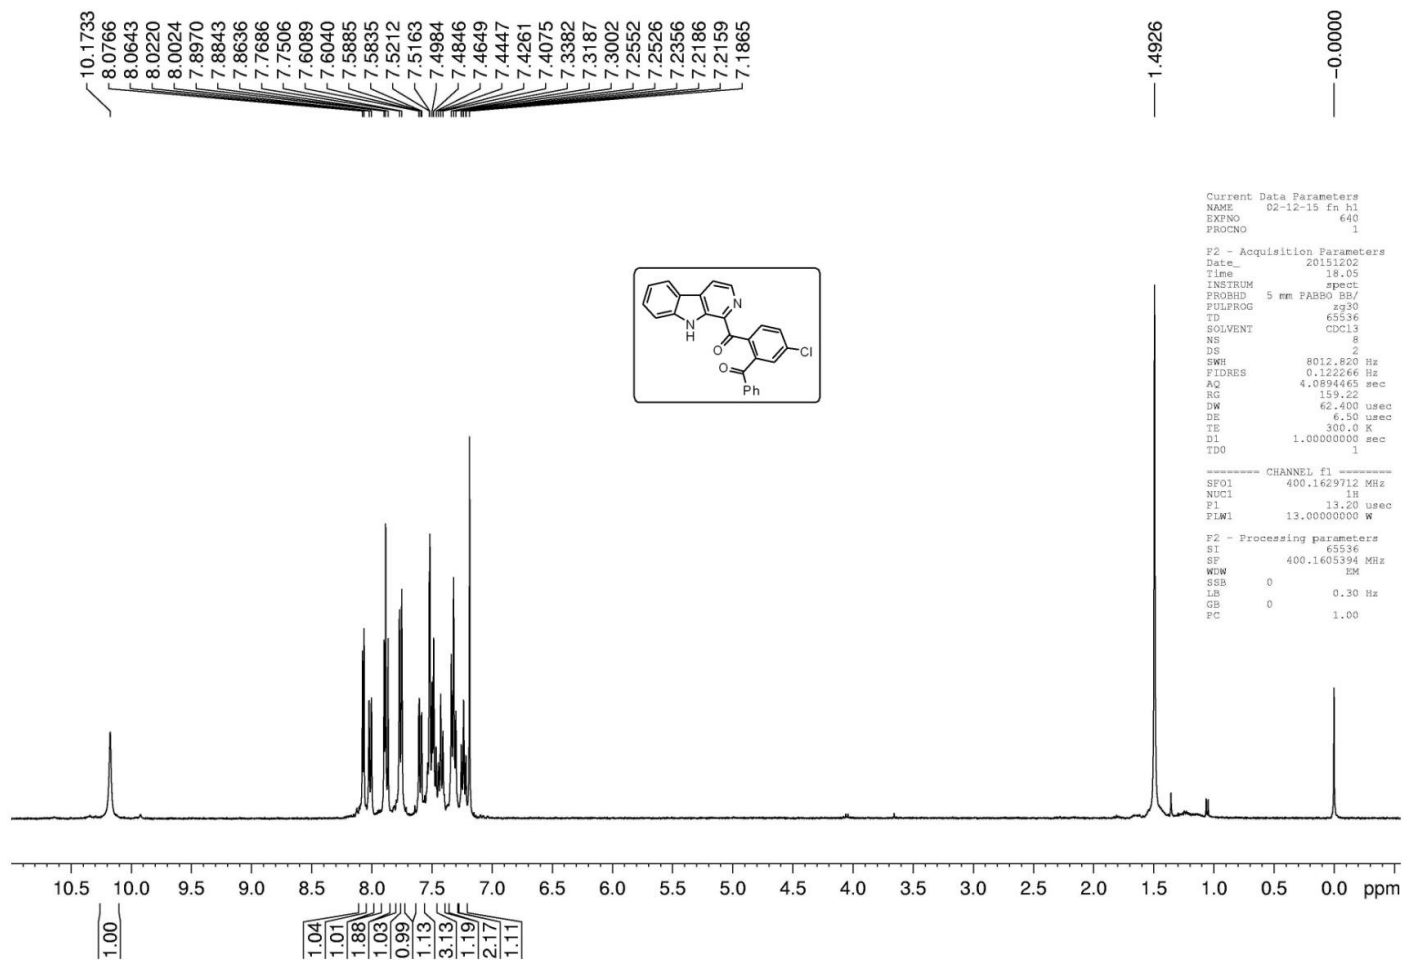

Figure. S-23:  $^1\text{H}$ -NMR spectrum of (2-Benzoyl-4-chlorophenyl)(9H-pyrido[3,4-b]indol-1-yl)methanone (3fa).

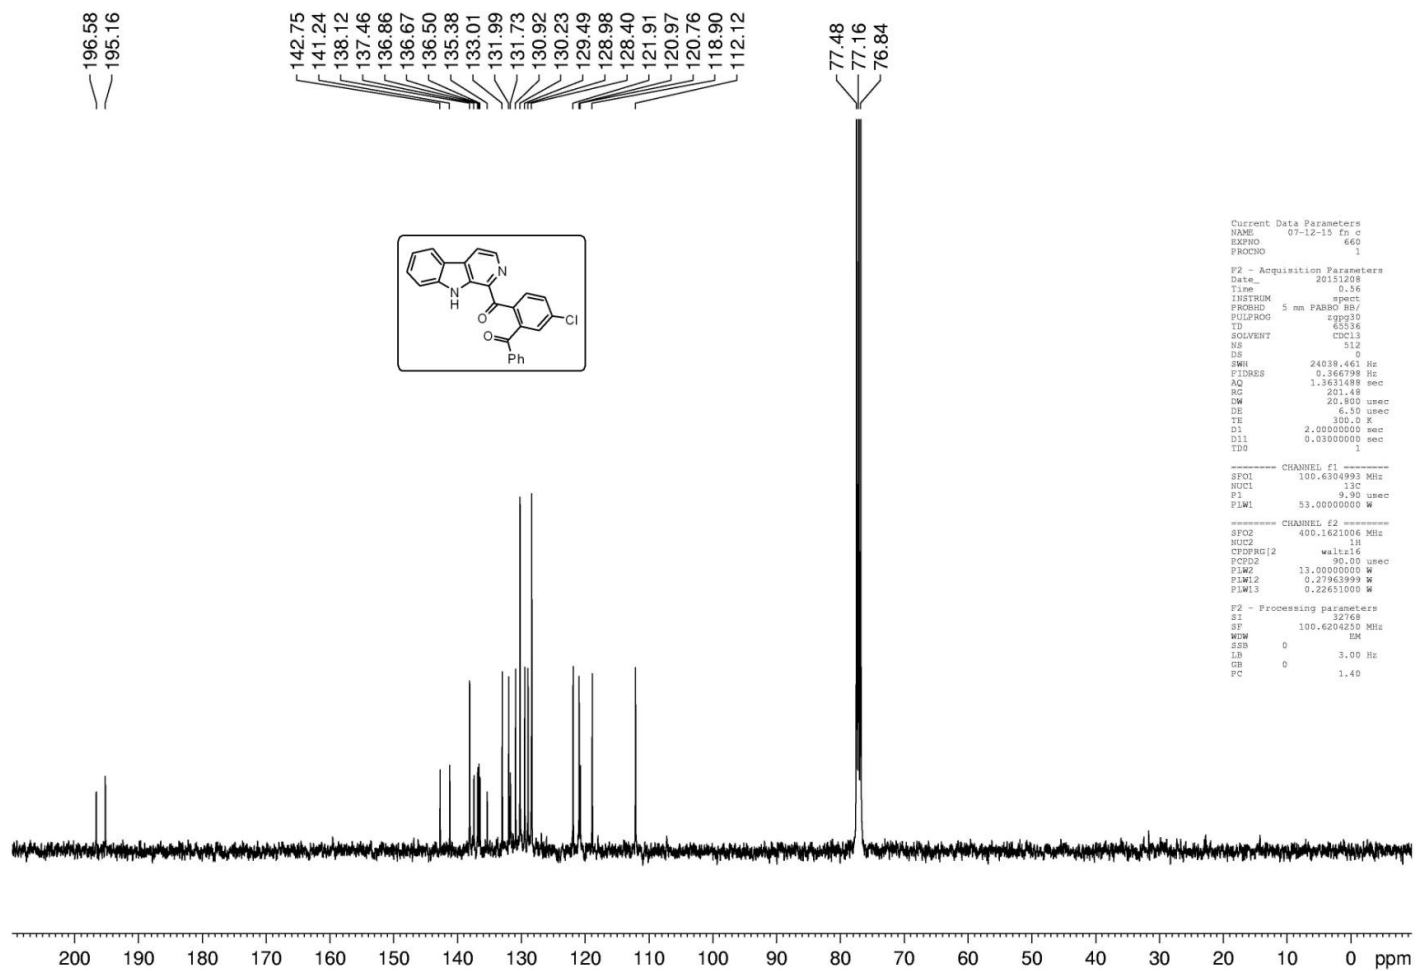

Figure. S-24: <sup>13</sup>C-NMR spectrum of (2-Benzoyl-4-chlorophenyl)(9H-pyrido[3,4-b]indol-1-yl)methanone (3fa).

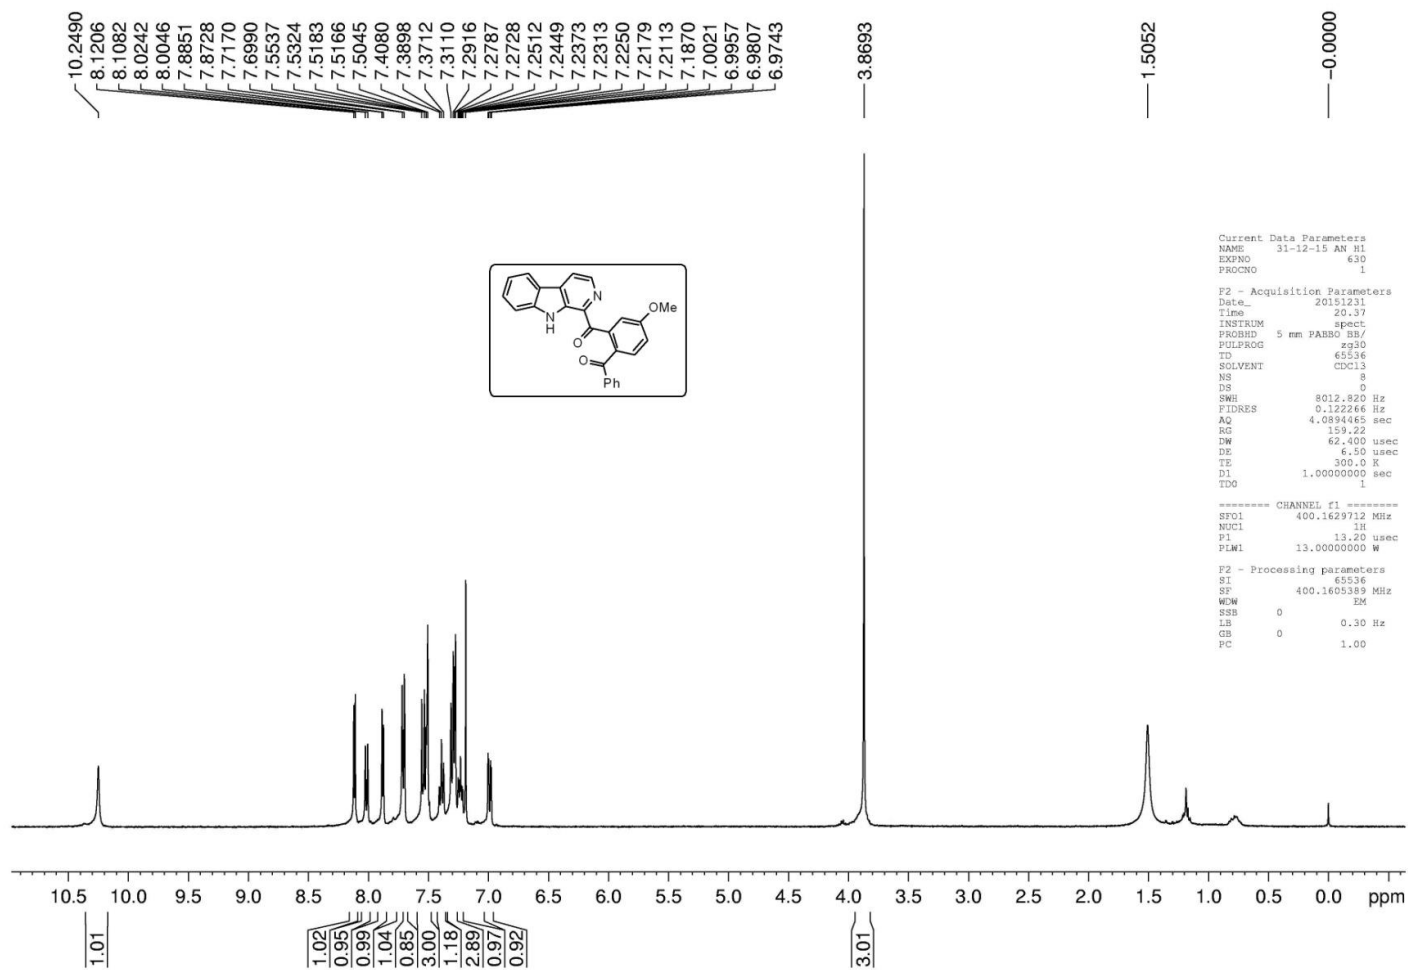

Figure. S-25:  $^1\text{H-NMR}$  spectrum of (2-Benzoyl-5-methoxyphenyl)(9H-pyrido[3,4-b]indol-1-yl)methanone (**3ga**).



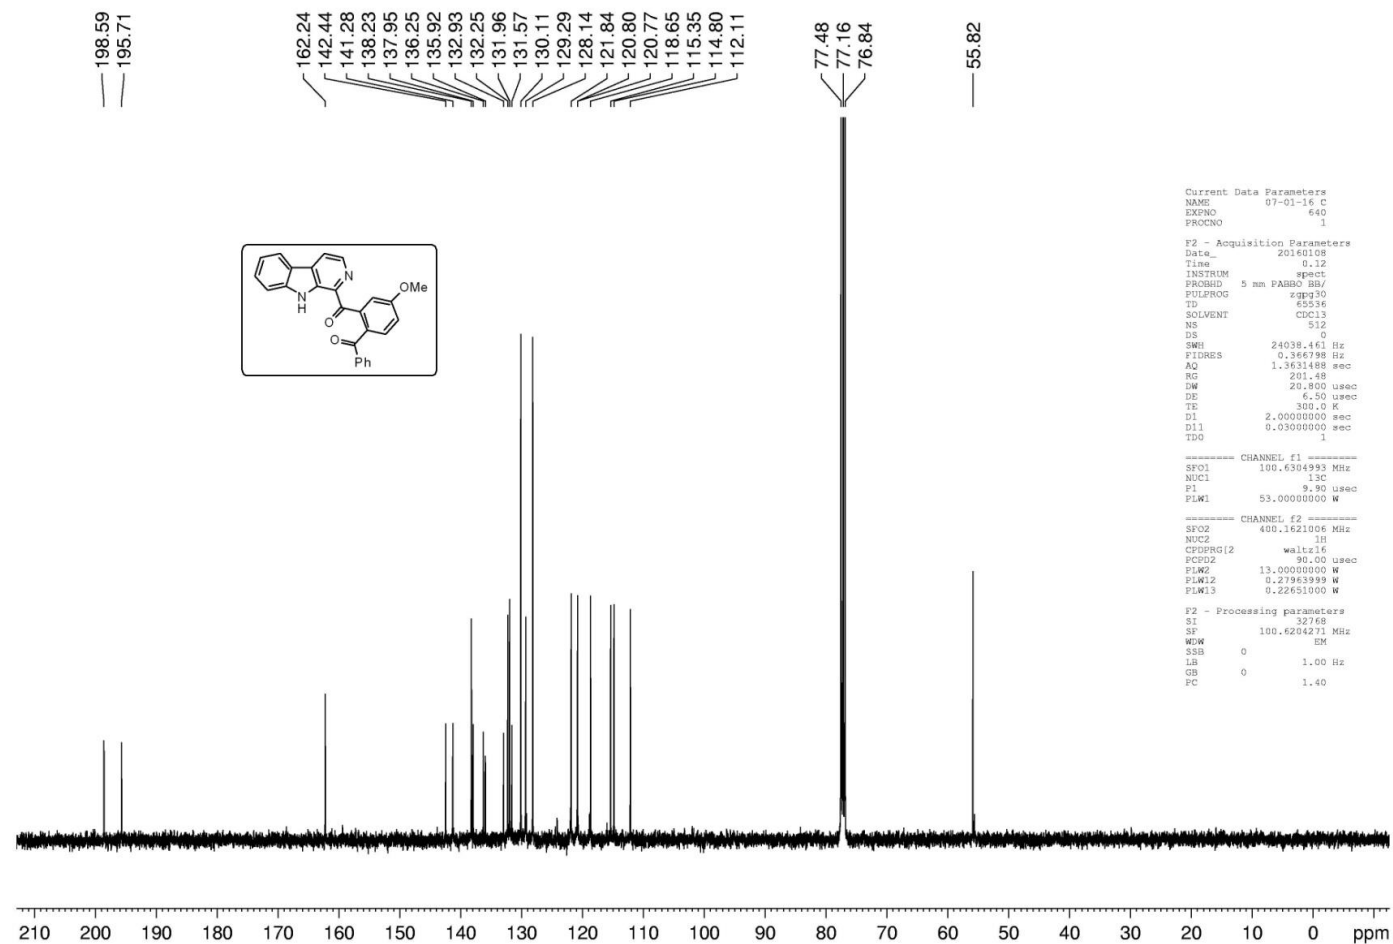

Figure. S-26: <sup>13</sup>C-NMR spectrum of (2-Benzoyl-5-methoxyphenyl)(9H-pyrido[3,4-b]indol-1-yl)methanone (3ga).

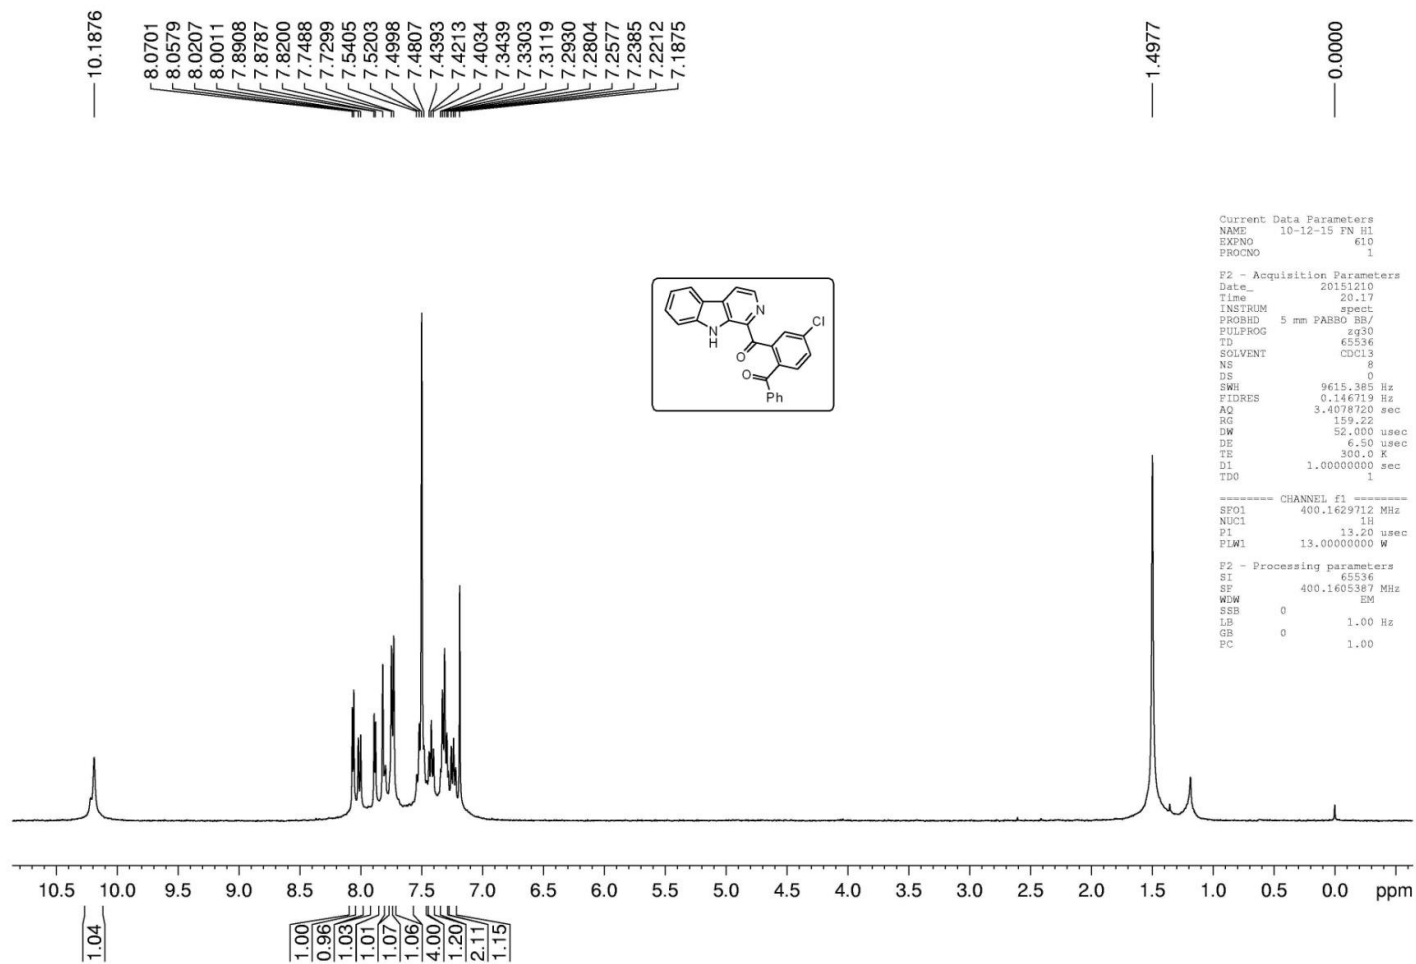

**Figure. S-27:**  $^1\text{H}$ -NMR spectrum of (2-Benzoyl-5-chlorophenyl)(9H-pyrido[3,4-b]indol-1-yl)methanone (**3ha**).

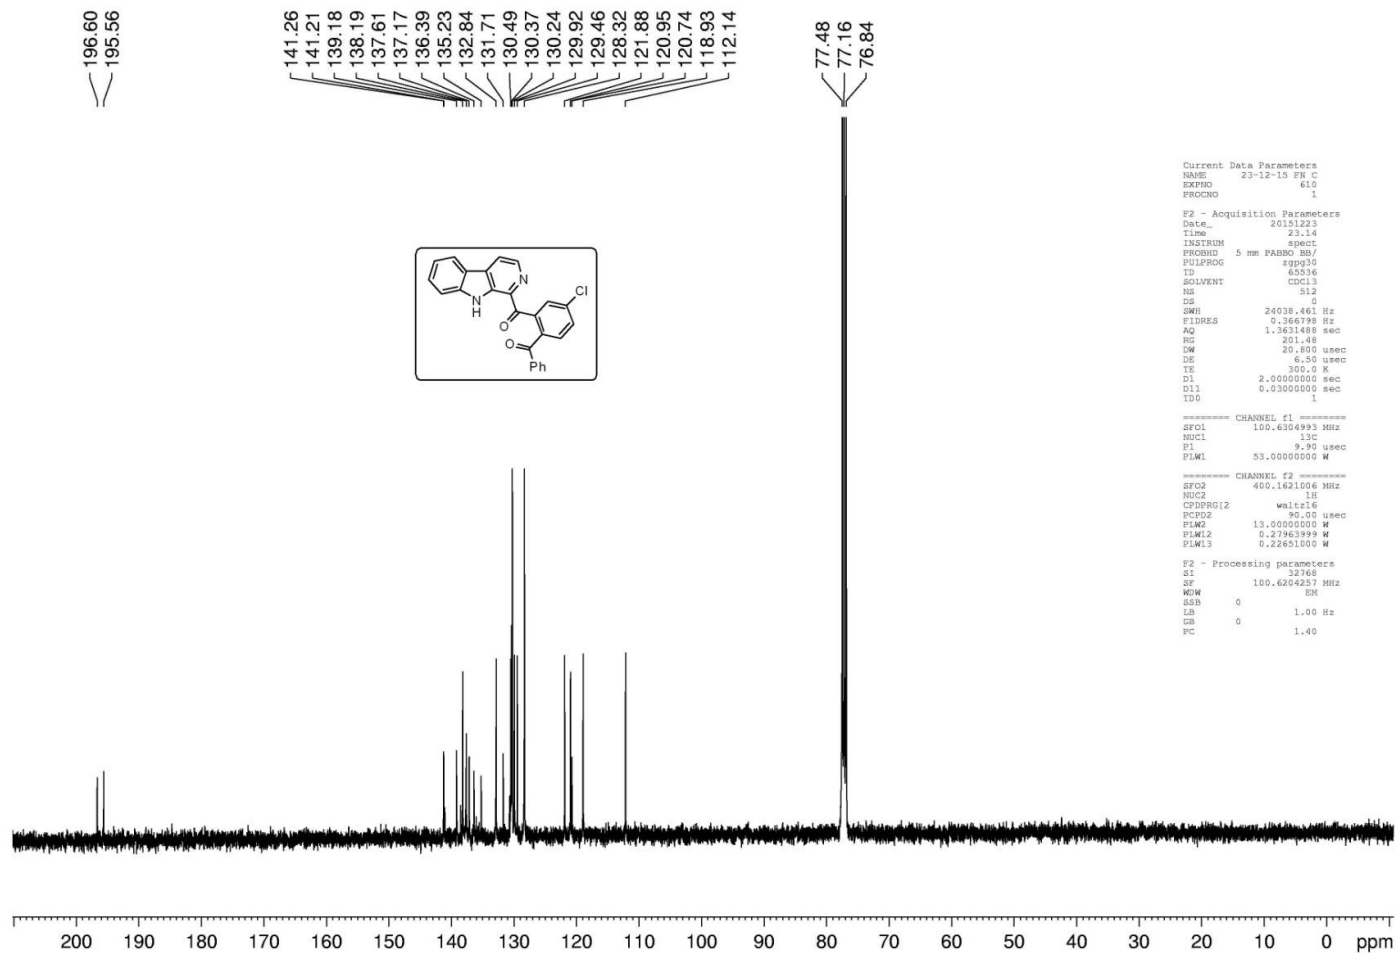

Figure. S-28: <sup>13</sup>C-NMR spectrum of (2-Benzoyl-5-chlorophenyl)(9H-pyrido[3,4-b]indol-1-yl)methanone (**3ha**).

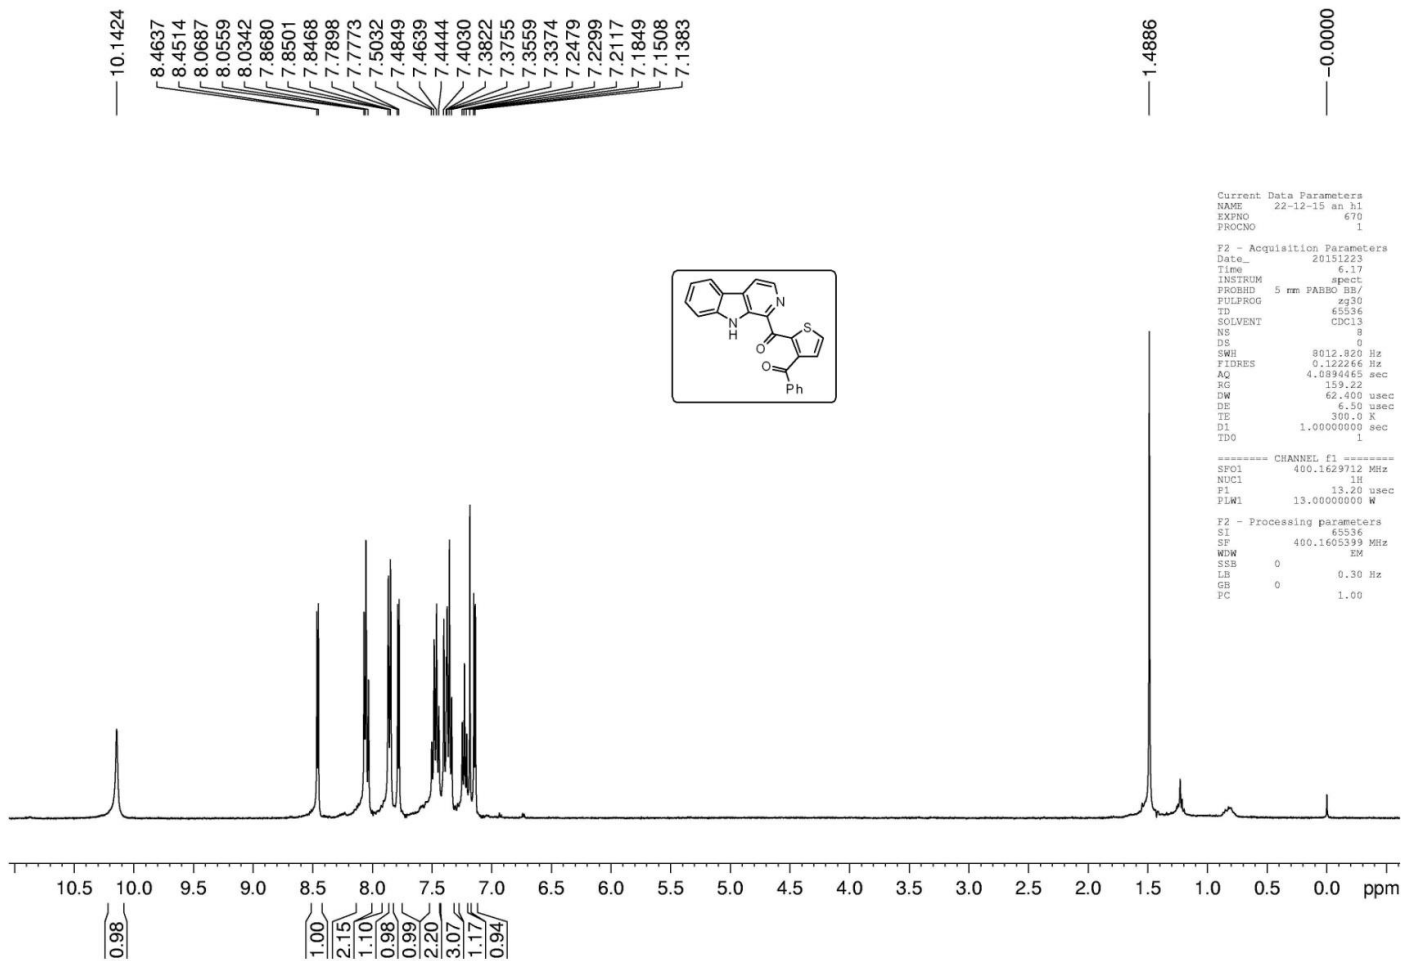

Figure. S-29:  $^1\text{H}$ -NMR spectrum of (2-(9H-pyrido[3,4-b]indole-1-carbonyl)thiophen-3-yl)(phenyl)methanone (**3ka**).

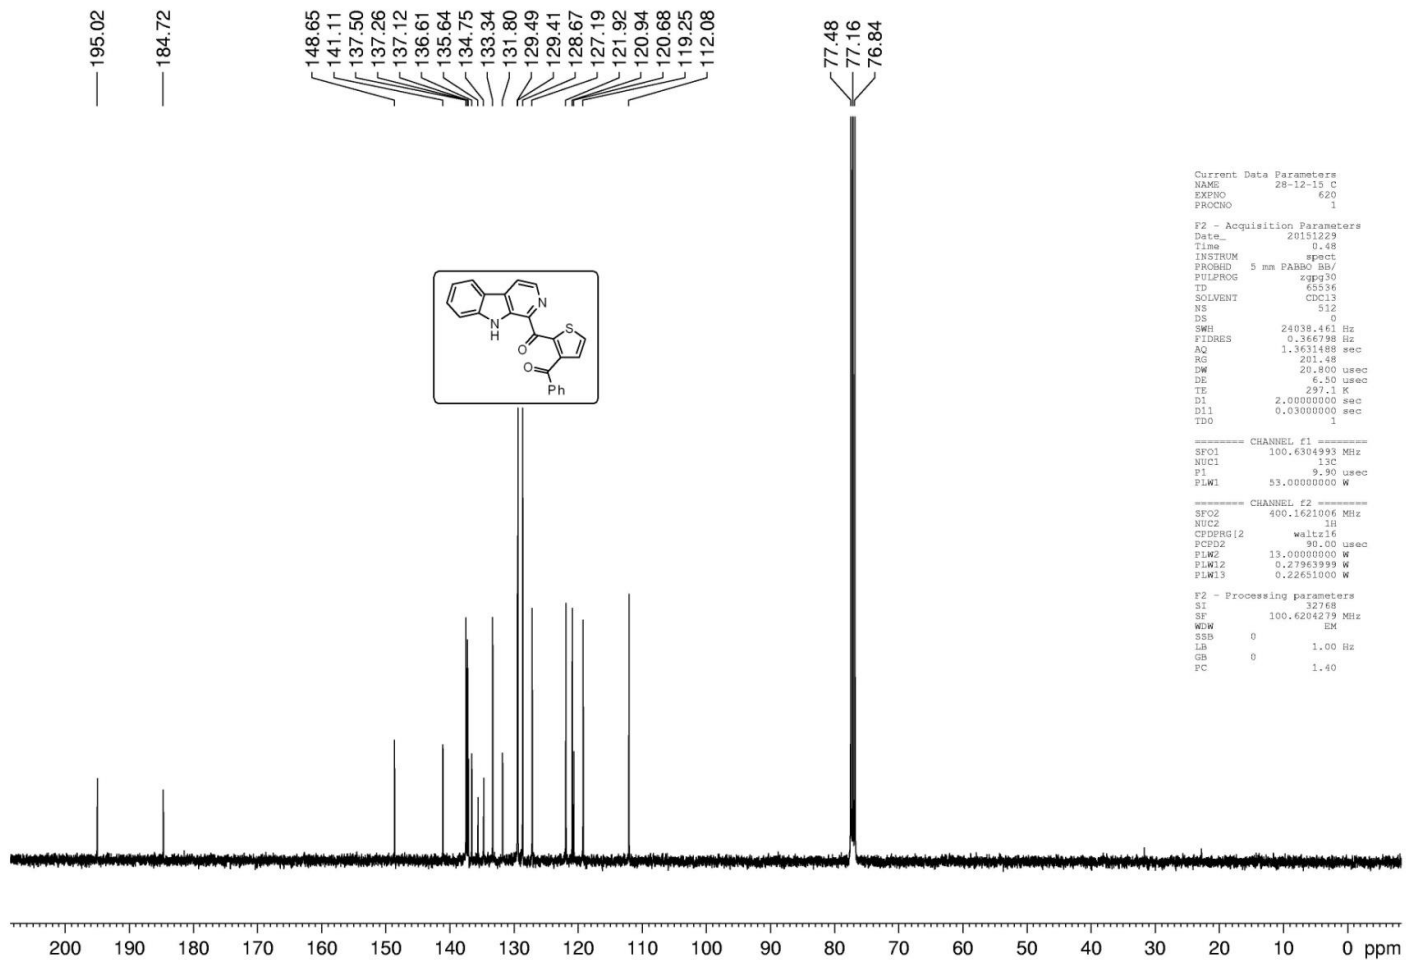

Figure. S-30:  $^{13}\text{C}$ -NMR spectrum of (2-(9H-pyrido[3,4-b]indole-1-carbonyl)thiophen-3-yl)(phenyl)methanone (**3ka**).

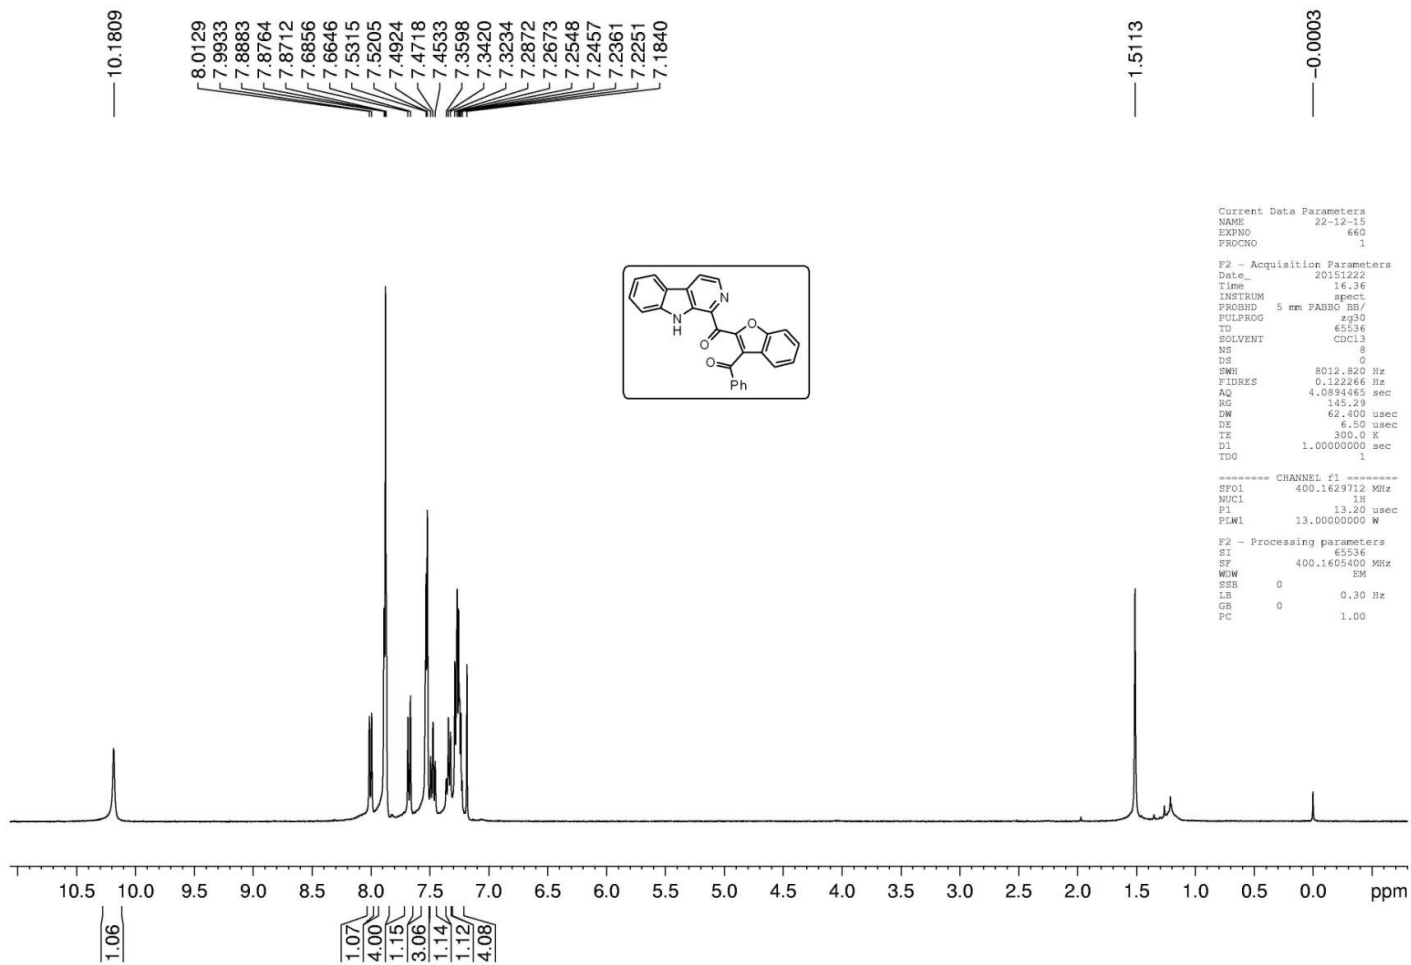

Figure. S-31: <sup>1</sup>H-NMR spectrum of (2-(9H-pyrido[3,4-b]indole-1-carbonyl)benzofuran-3-yl)(phenyl)methanone (**31a**).

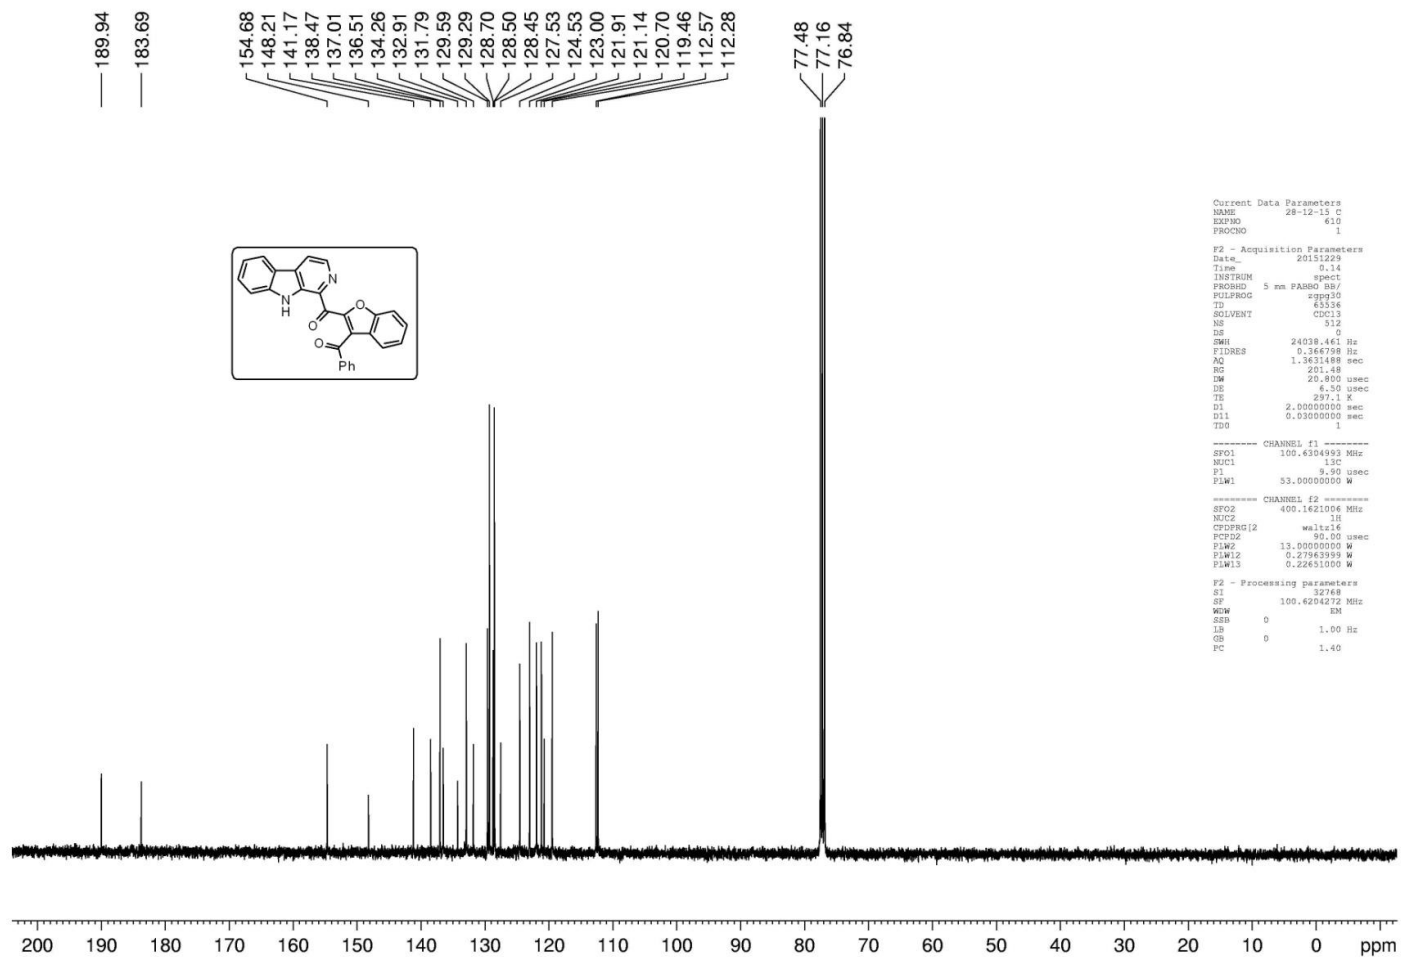

Figure. S-32: <sup>13</sup>C-NMR spectrum of (2-(9H-pyrido[3,4-b]indole-1-carbonyl)benzofuran-3-yl)(phenyl)methanone (31a).

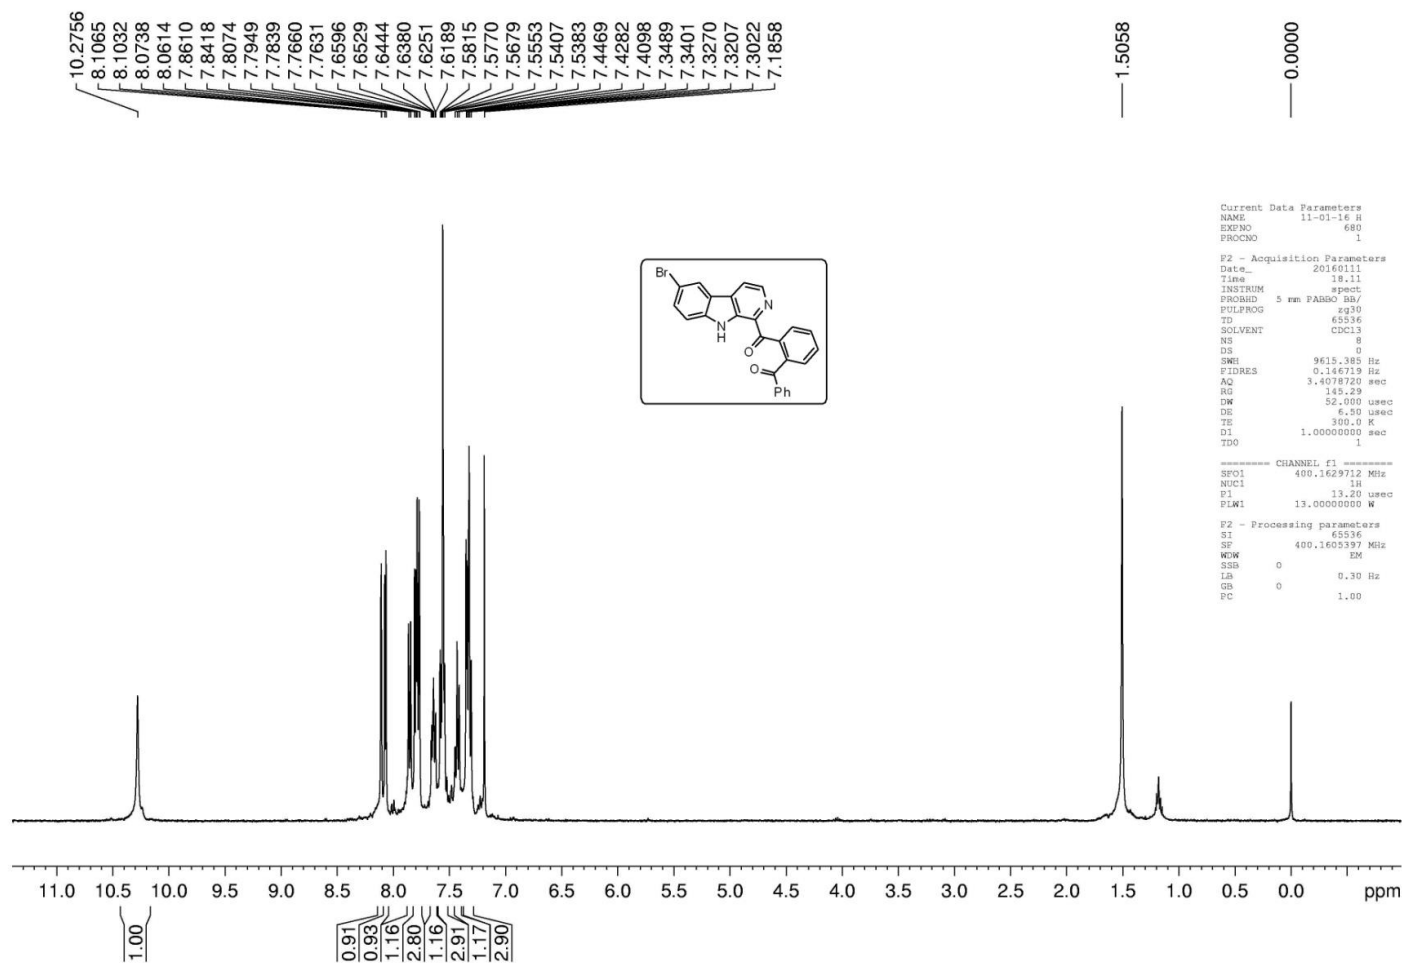

Figure. S-33:  $^1\text{H}$ -NMR spectrum of (2-Benzoylphenyl)(6-bromo-9H-pyrido[3,4-b]indol-1-yl)methanone (**3ma**).



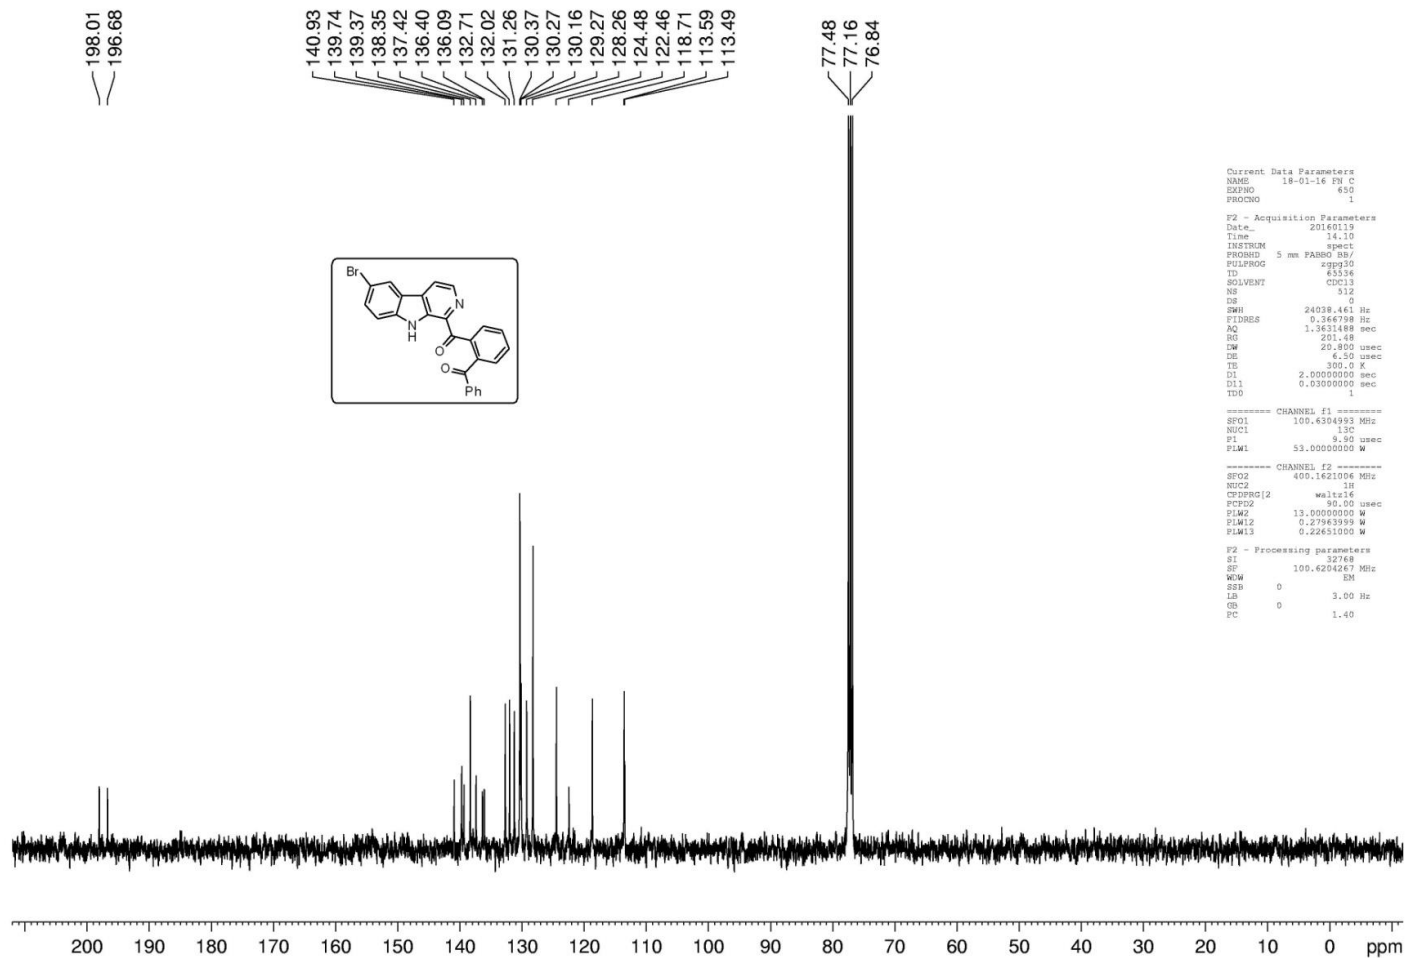

Figure. S-34: <sup>13</sup>C-NMR spectrum of (2-Benzoylphenyl)(6-bromo-9H-pyrido[3,4-b]indol-1-yl)methanone (**3ma**).

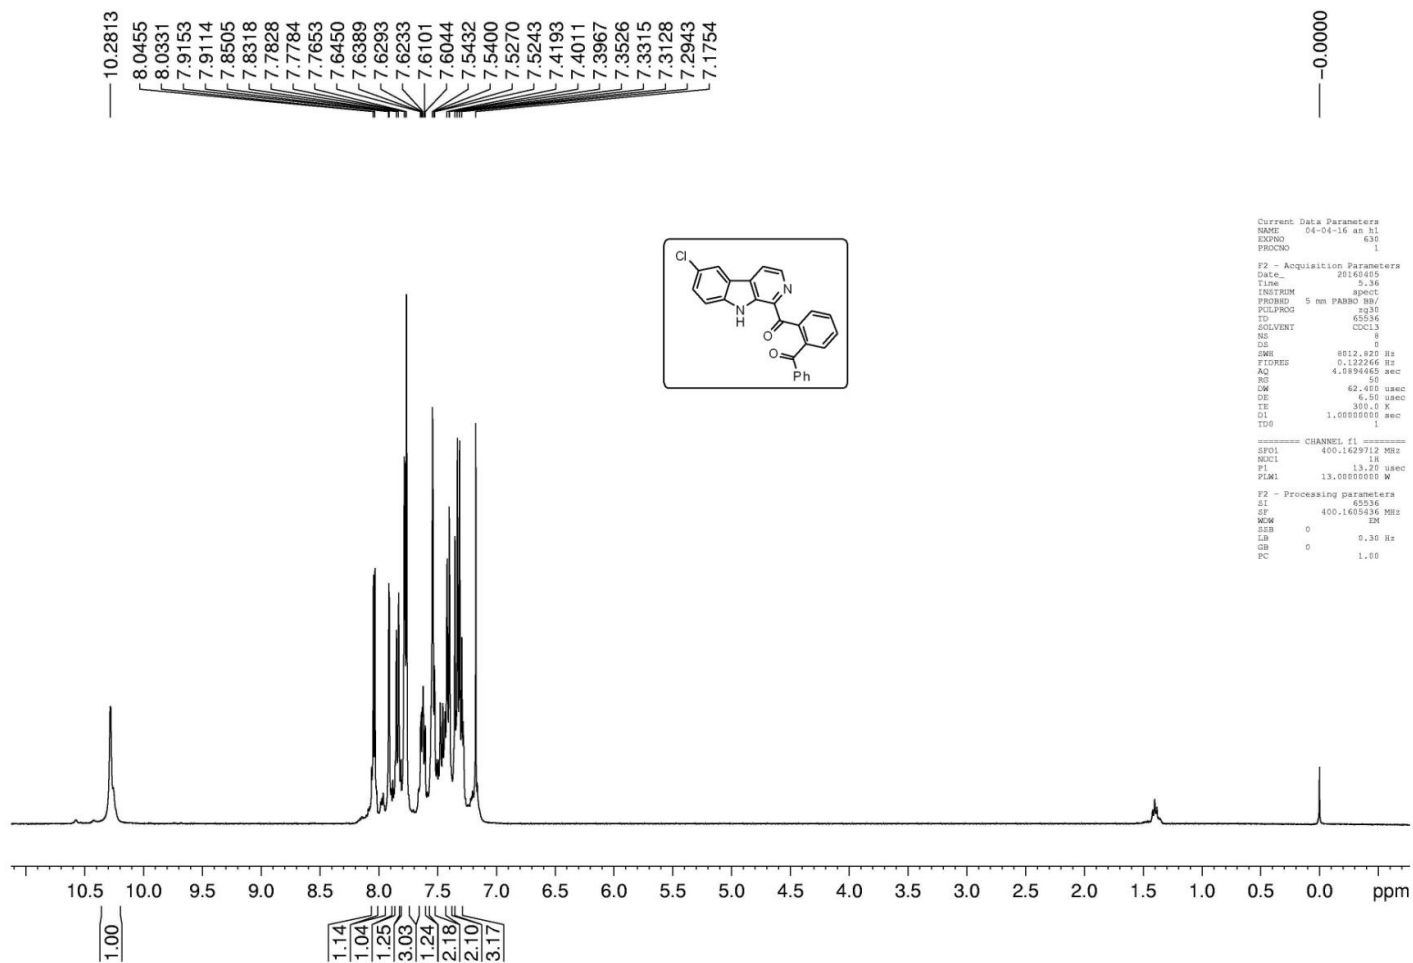

**Figure. S-35:**  $^1\text{H-NMR}$  spectrum of (2-Benzoylphenyl)(6-chloro-9H-pyrido[3,4-b]indol-1-yl)methanone (**3na**).

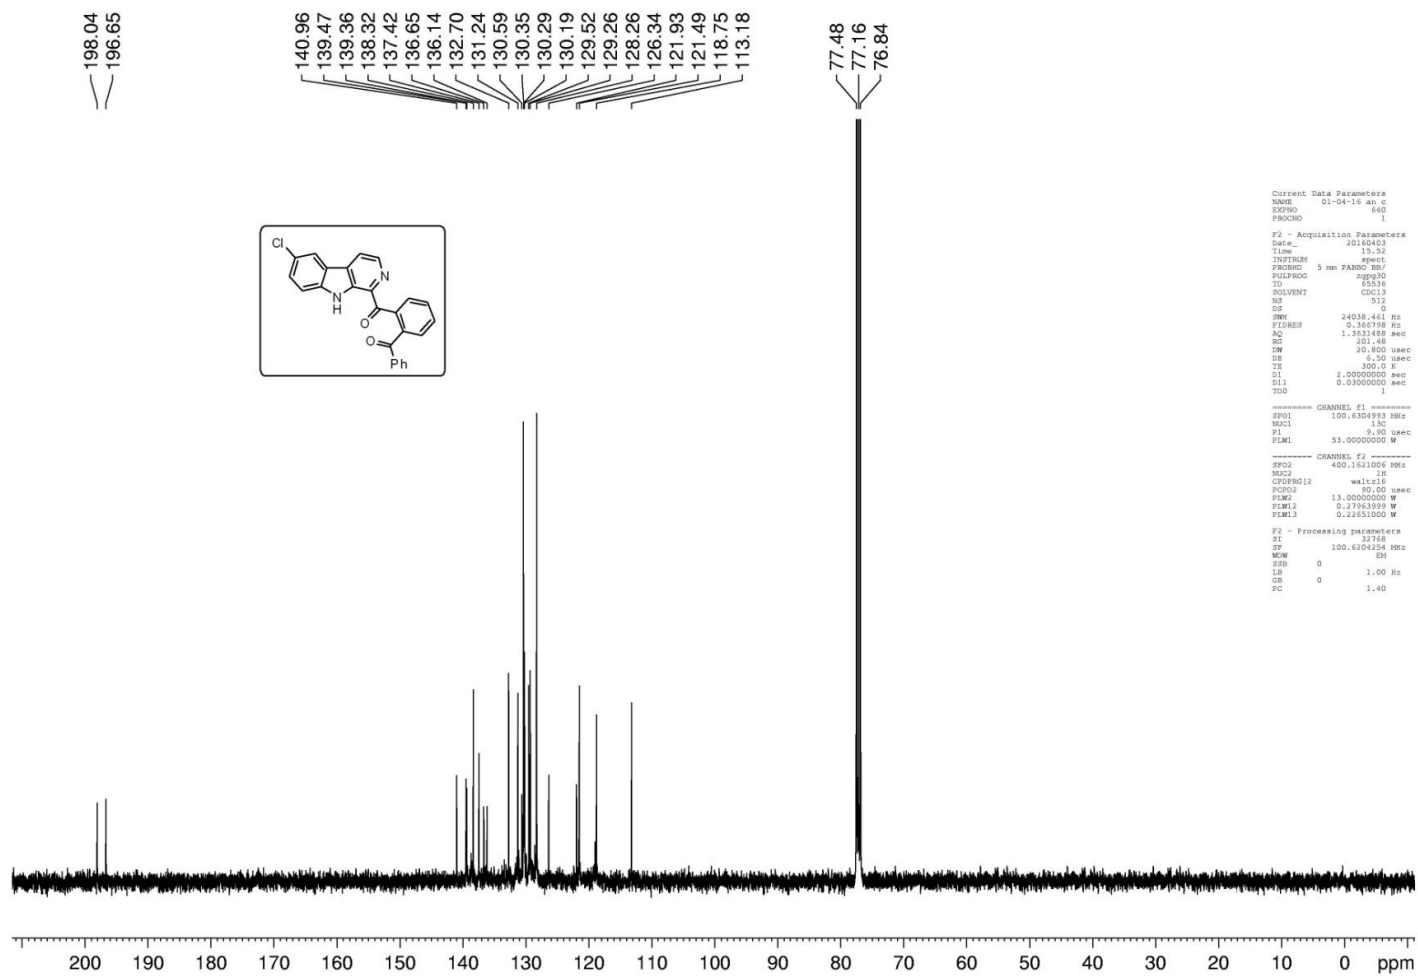

Figure. S-36: <sup>13</sup>C-NMR spectrum of (2-Benzoylphenyl)(6-chloro-9H-pyrido[3,4-b]indol-1-yl)methanone (3na).

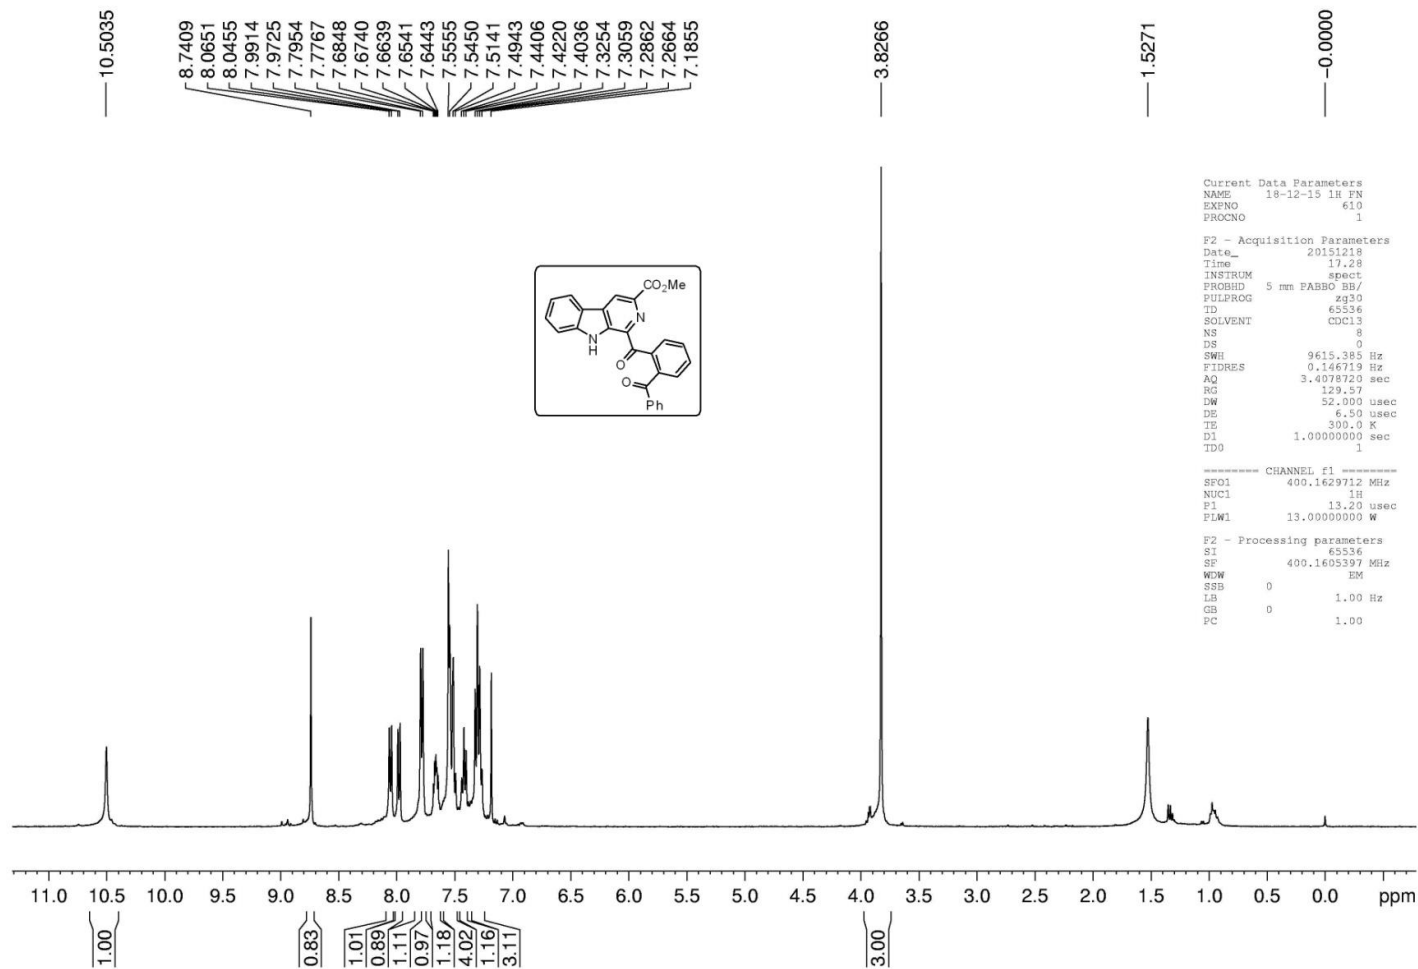

Figure. S-37: <sup>1</sup>H-NMR spectrum of Methyl 1-(2-benzoylbenzoyl)-9H-pyrido[3,4-b]indole-3-carboxylate (**30a**).

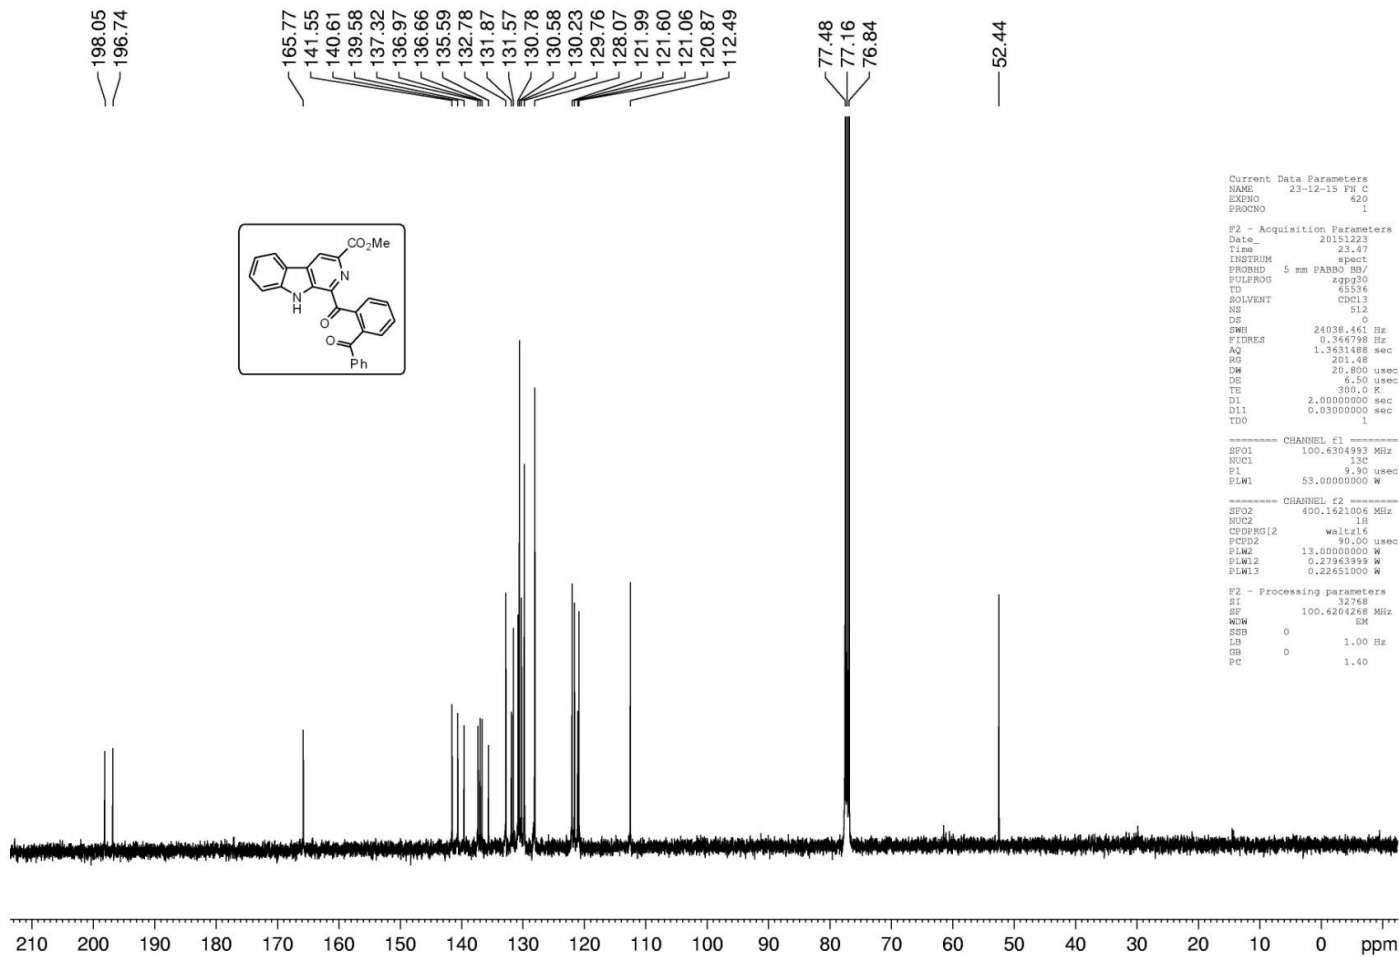

Figure. S-38: <sup>13</sup>C-NMR spectrum of Methyl 1-(2-benzoylbenzoyl)-9H-pyrido[3,4-b]indole-3-carboxylate (30a).

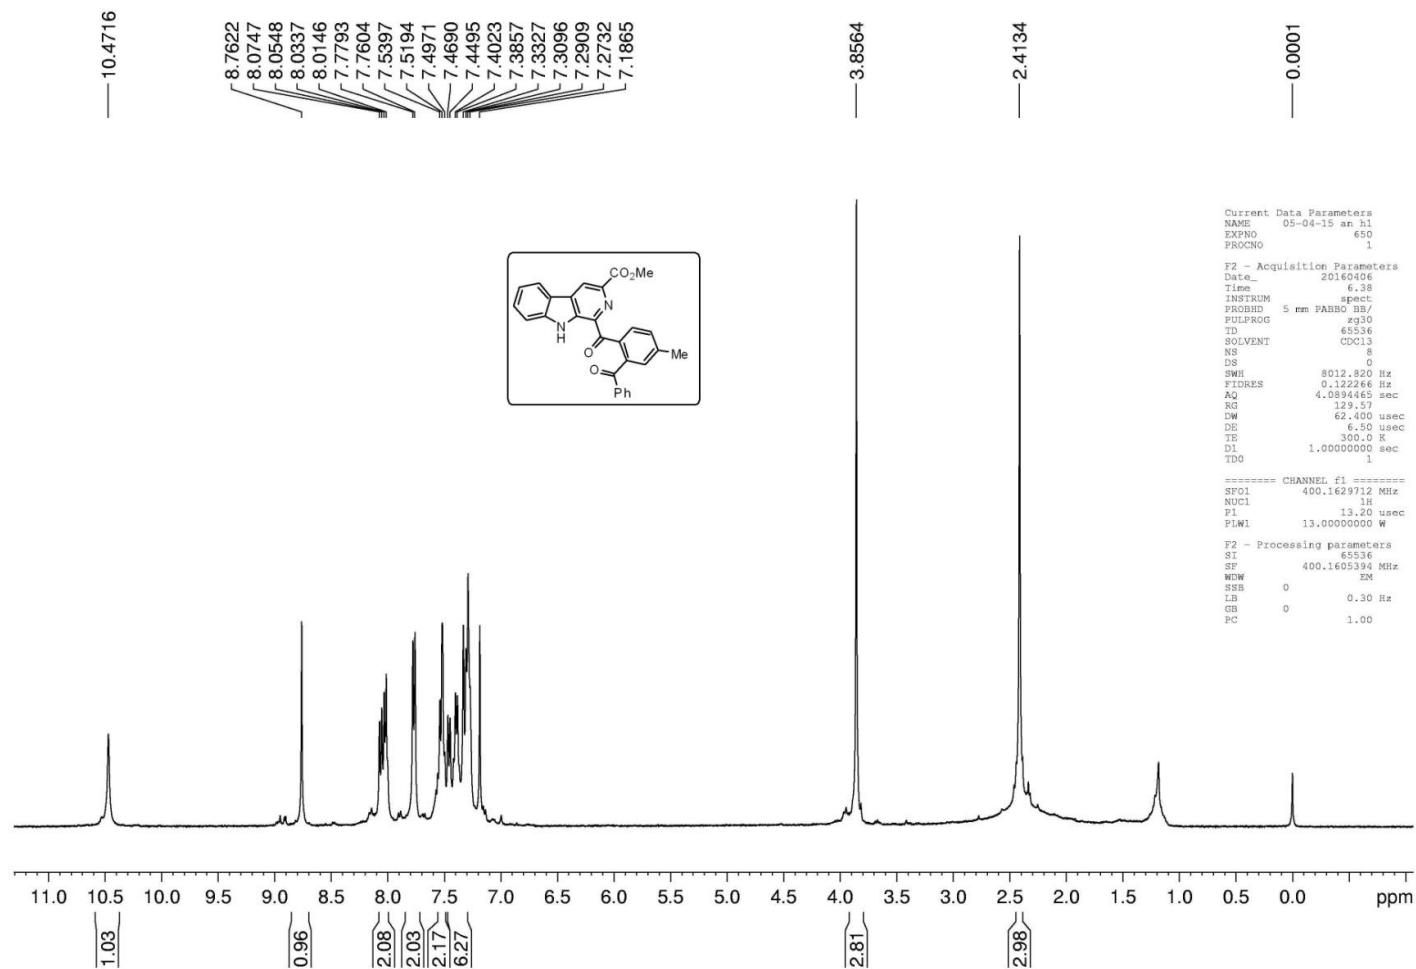

**Figure. S-39:**  $^1\text{H}$ -NMR spectrum of Methyl 1-(2-benzoyl-4-methylbenzoyl)-9H-pyrido[3,4-b]indole-3-carboxylate (**3pa**).

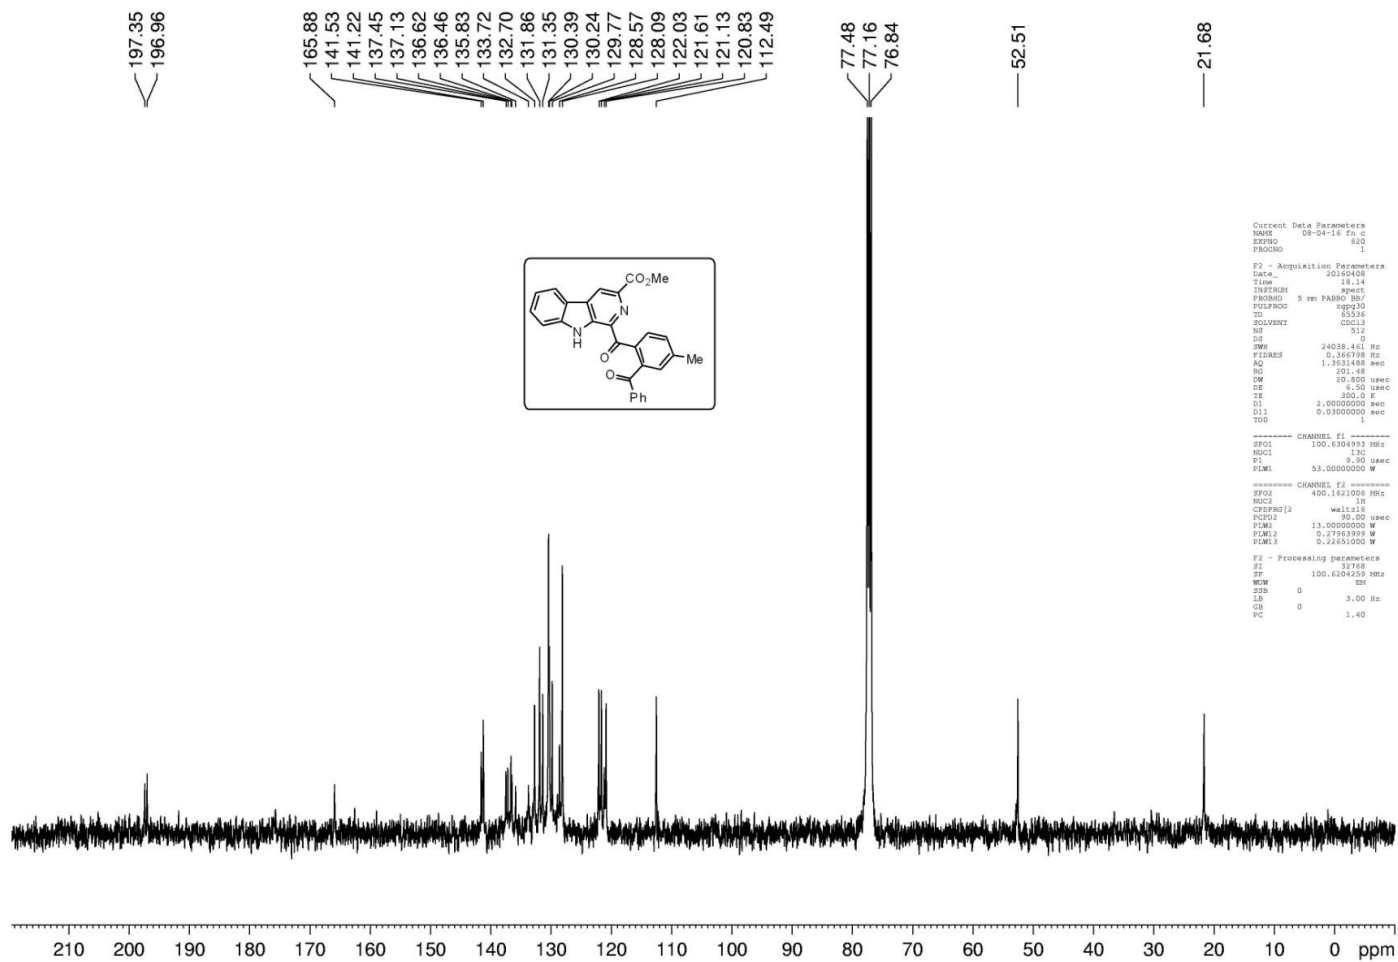

Figure. S-40:  $^{13}\text{C}$ -NMR spectrum of Methyl 1-(2-benzoyl-4-methylbenzoyl)-9H-pyrido[3,4-b]indole-3-carboxylate (**3pa**).

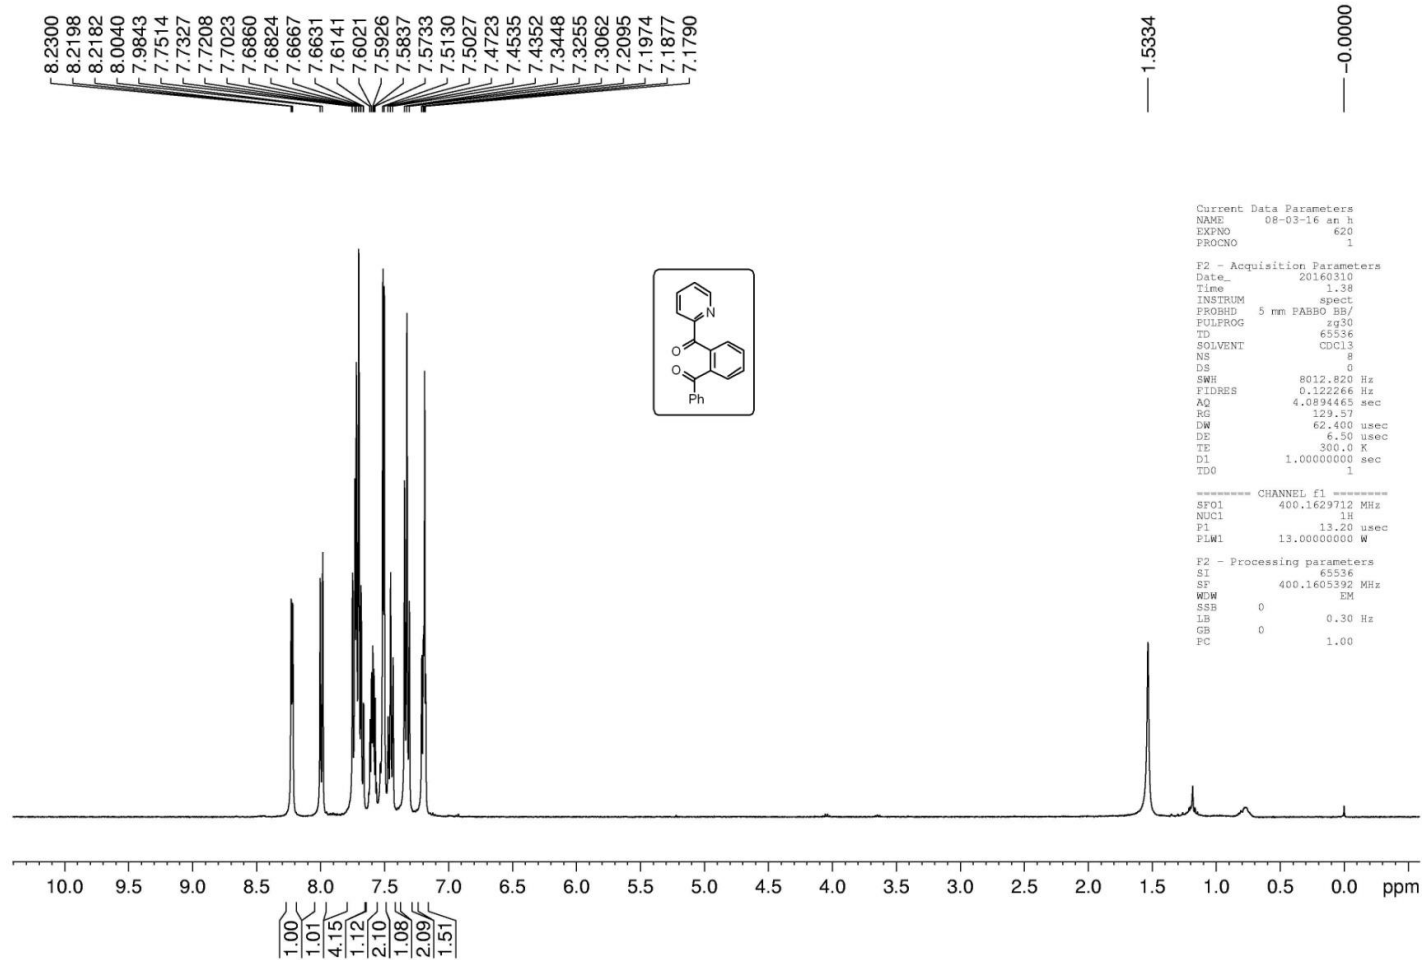

Figure. S-41: <sup>1</sup>H-NMR spectrum of (2-Benzoylphenyl)(pyridin-2-yl)methanone (3qa).



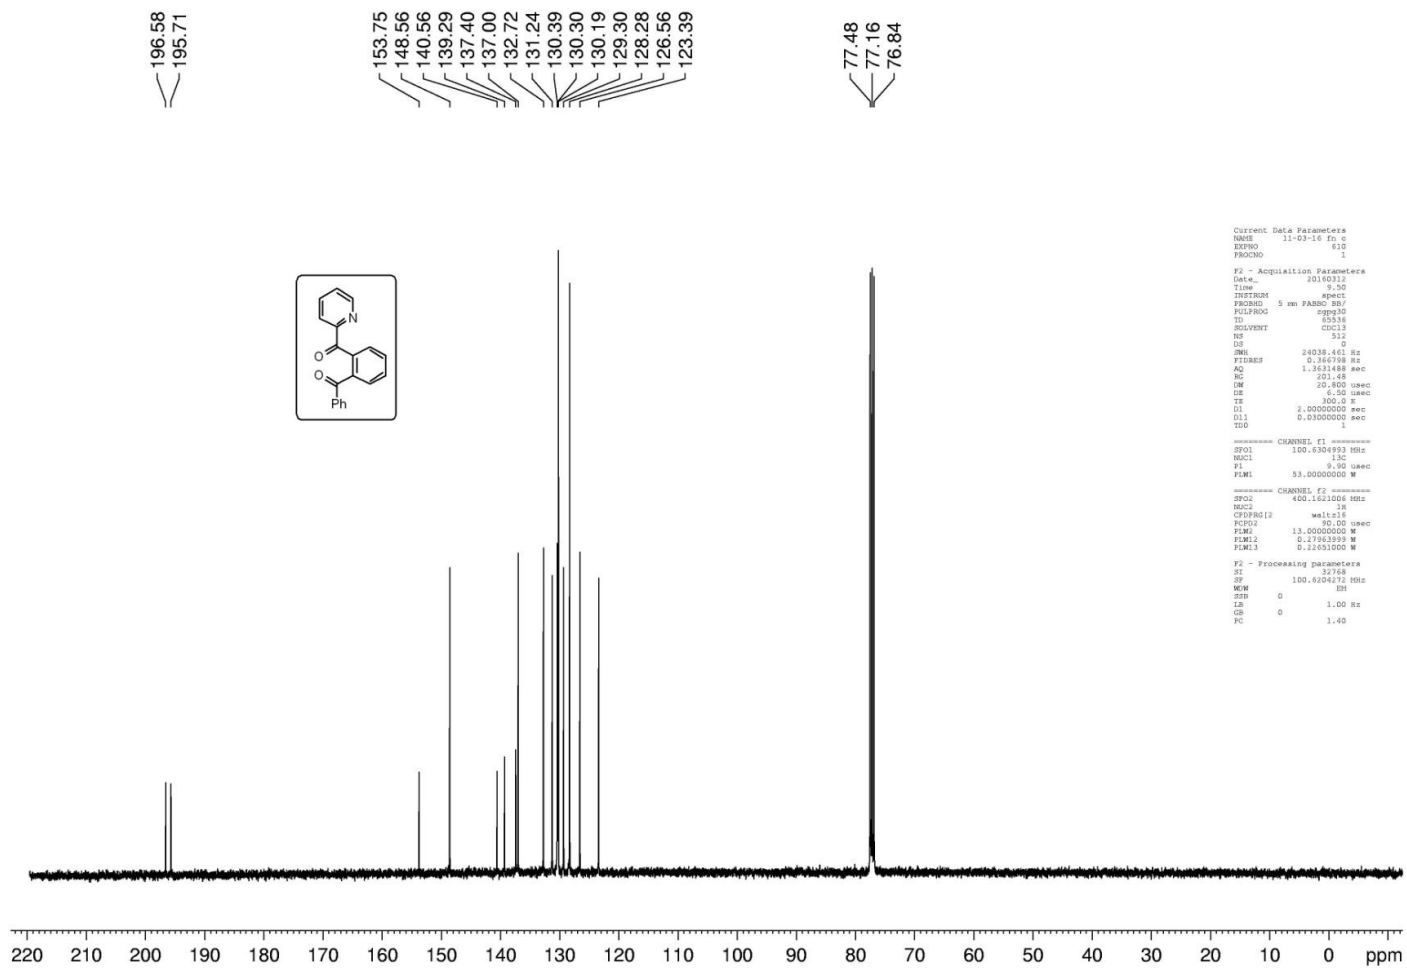

Figure. S-42: <sup>13</sup>C-NMR spectrum of (2-Benzoylphenyl)(pyridin-2-yl)methanone (3qa).

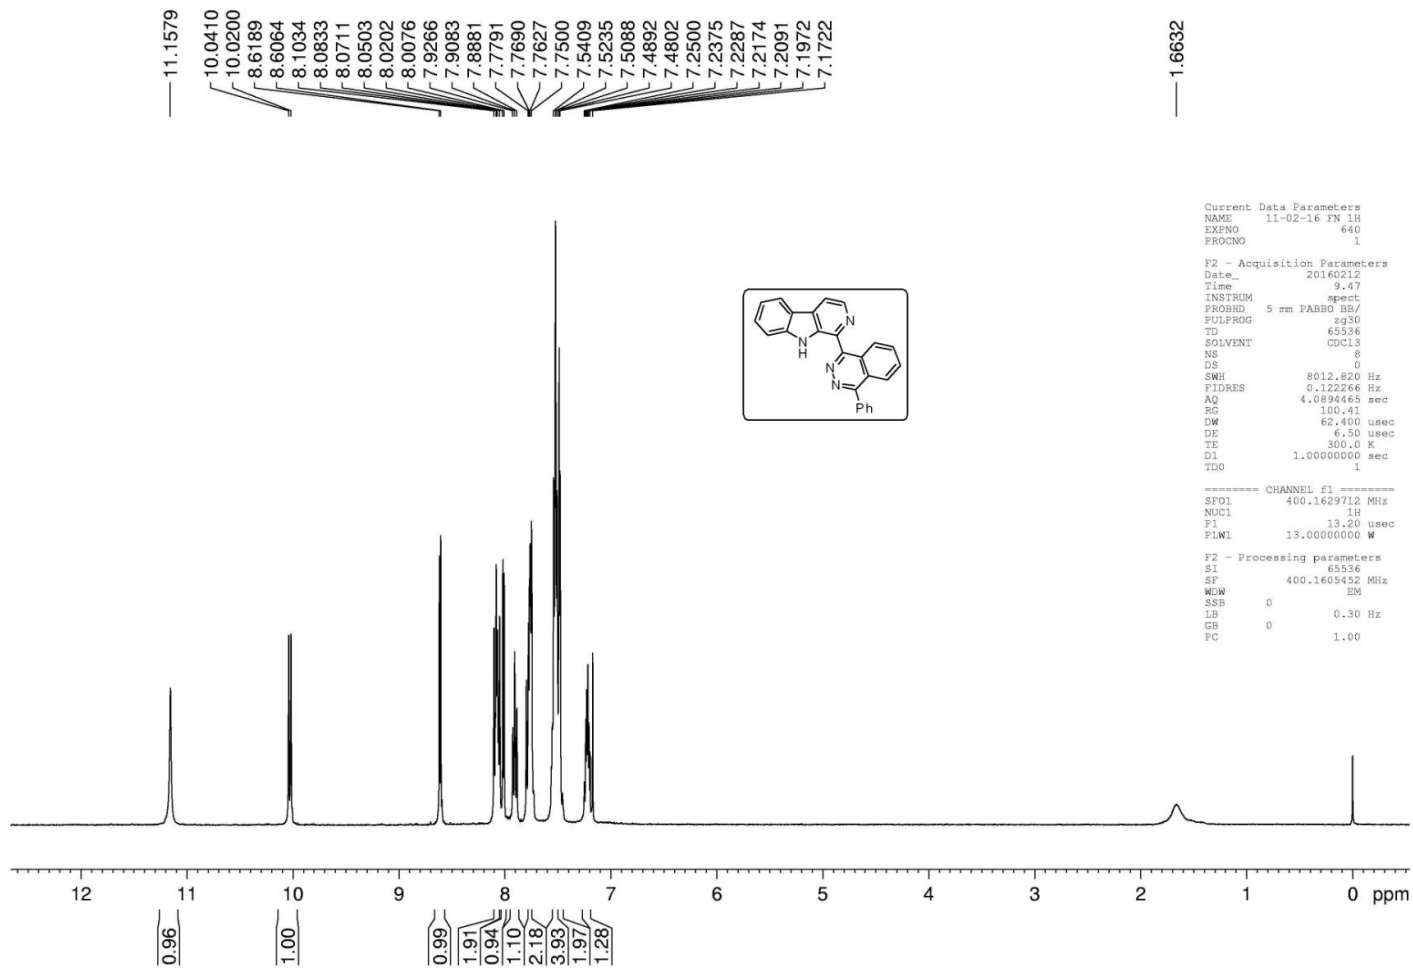

**Figure. S-43:**  $^1\text{H}$ -NMR spectrum of (1-(4-Phenylphthalazin-1-yl)-9H-pyrido[3,4-b]indole (**5aa**).

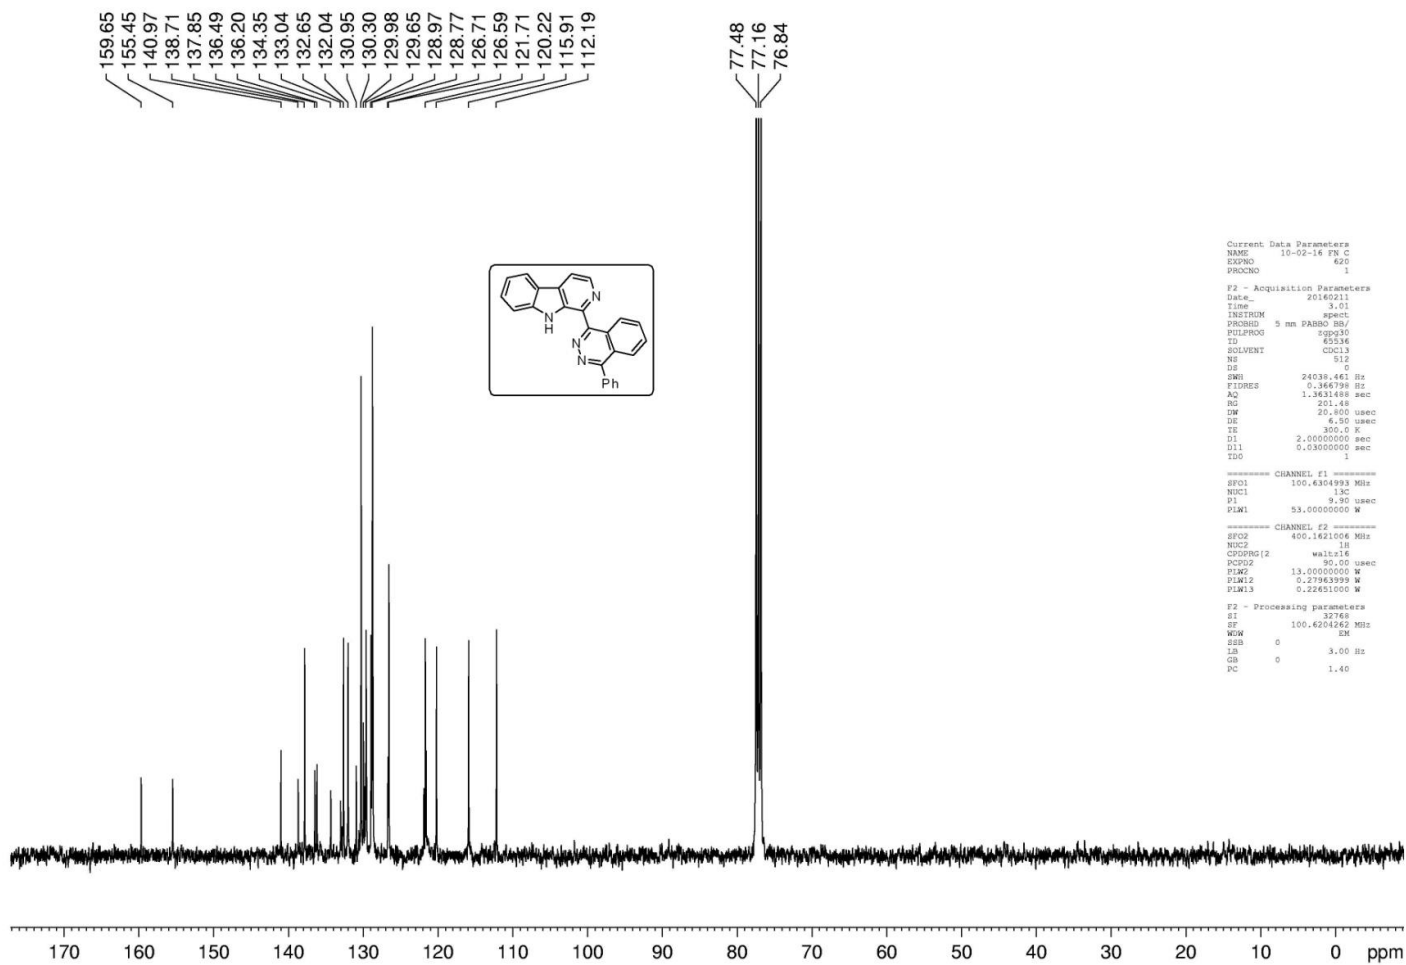

Figure. S-44:  $^{13}\text{C}$ -NMR spectrum of (1-(4-Phenylphthalazin-1-yl)-9H-pyrido[3,4-b]indole (5aa).

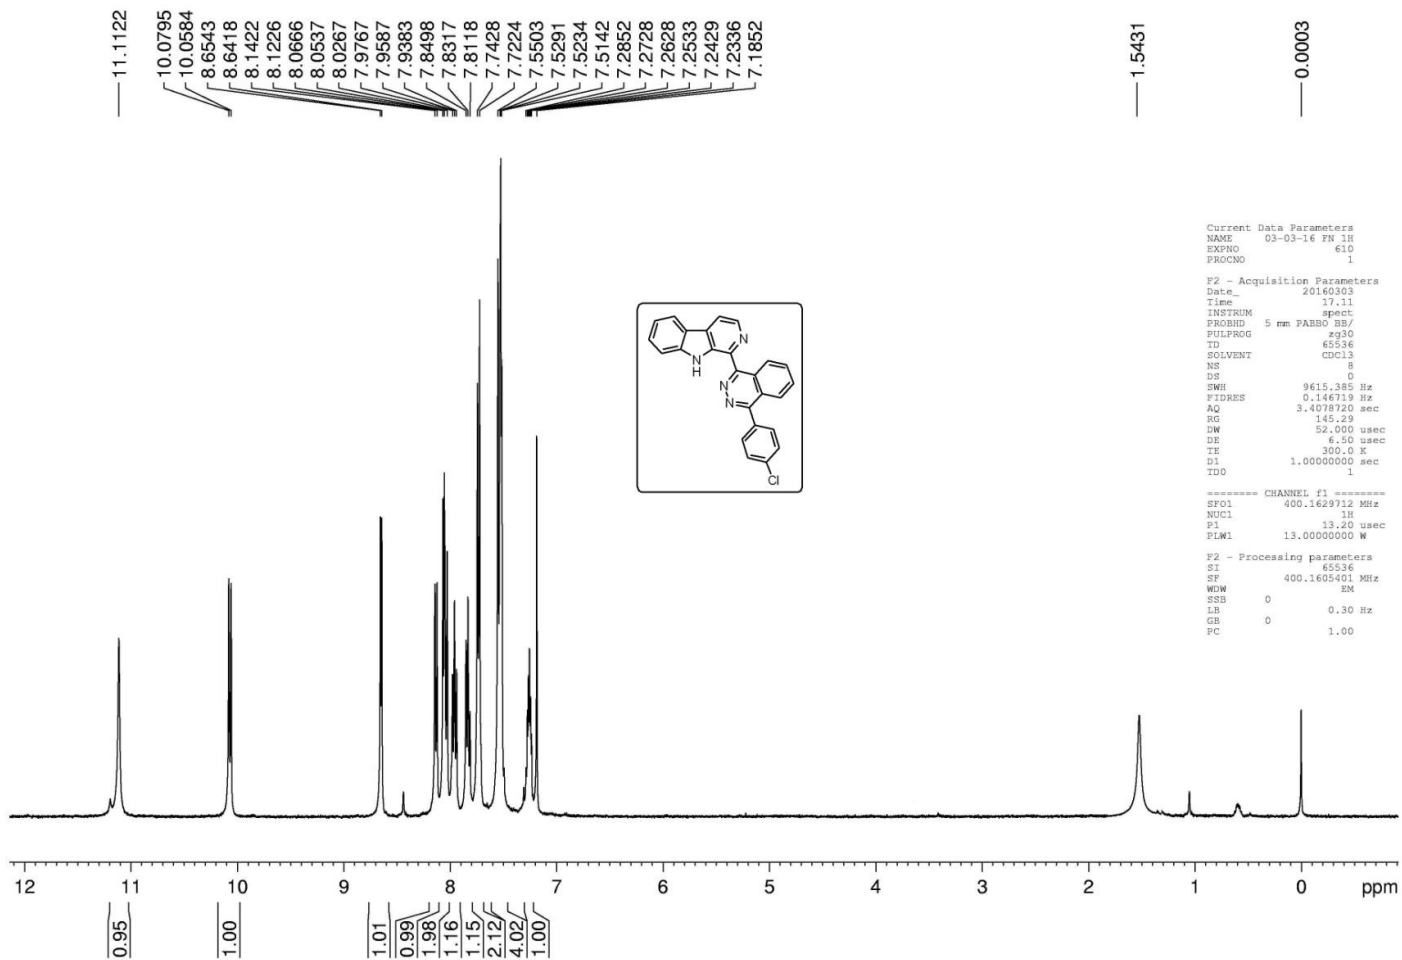

Figure. S-45:  $^1\text{H}$ -NMR spectrum of 1-(4-(4-Chlorophenyl)phthalazin-1-yl)-9H-pyrido[3,4-b]indole (**5ac**).

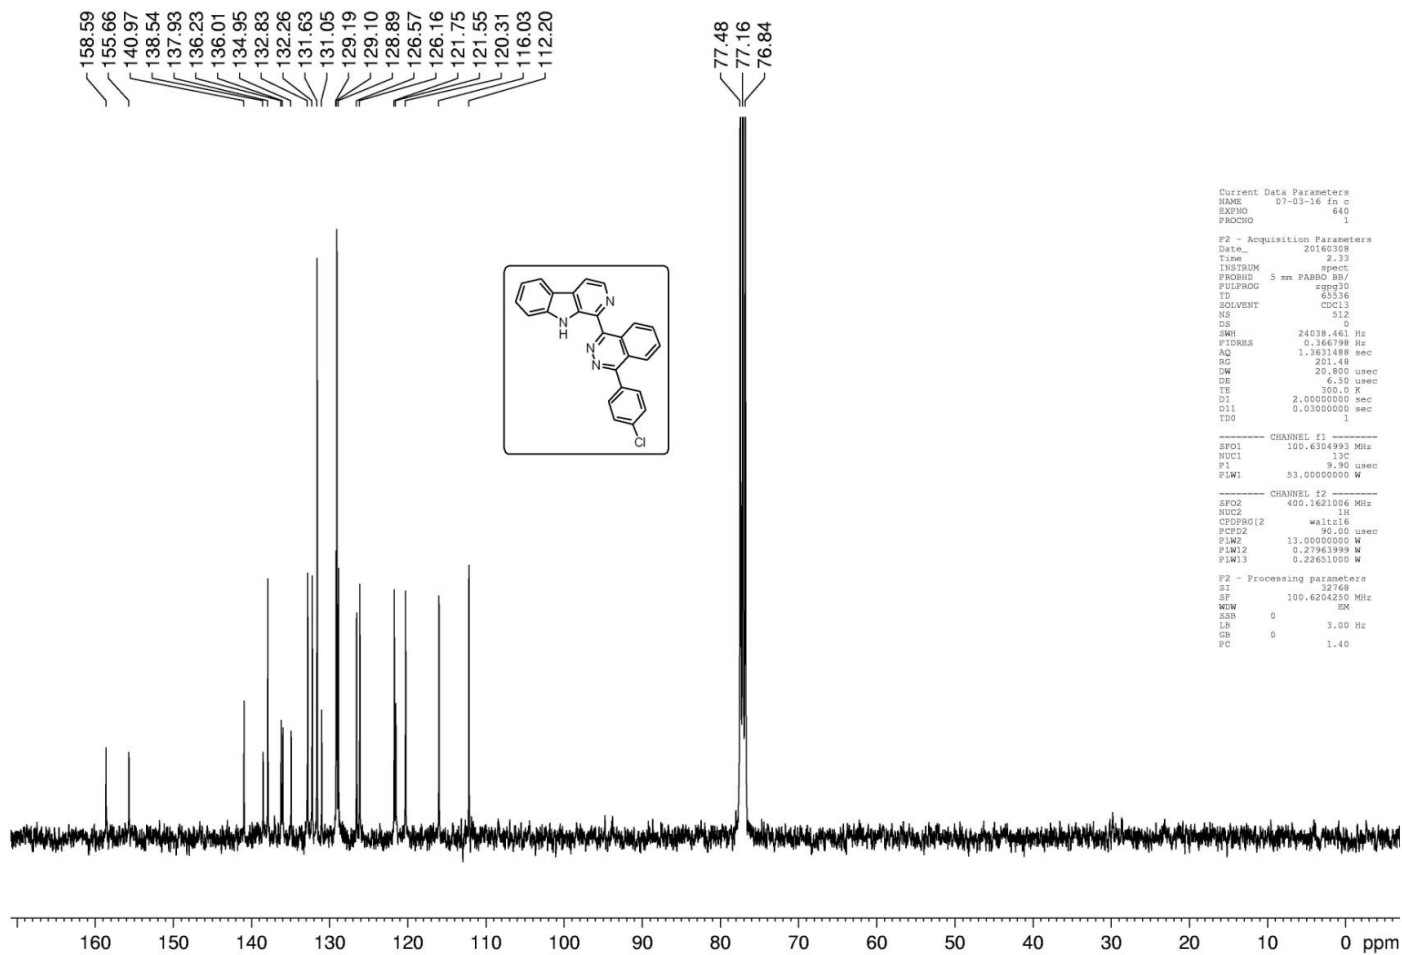

Figure. S-46: <sup>13</sup>C-NMR spectrum of 1-(4-(4-Chlorophenyl)phthalazin-1-yl)-9H-pyrido[3,4-b]indole (**5ac**).

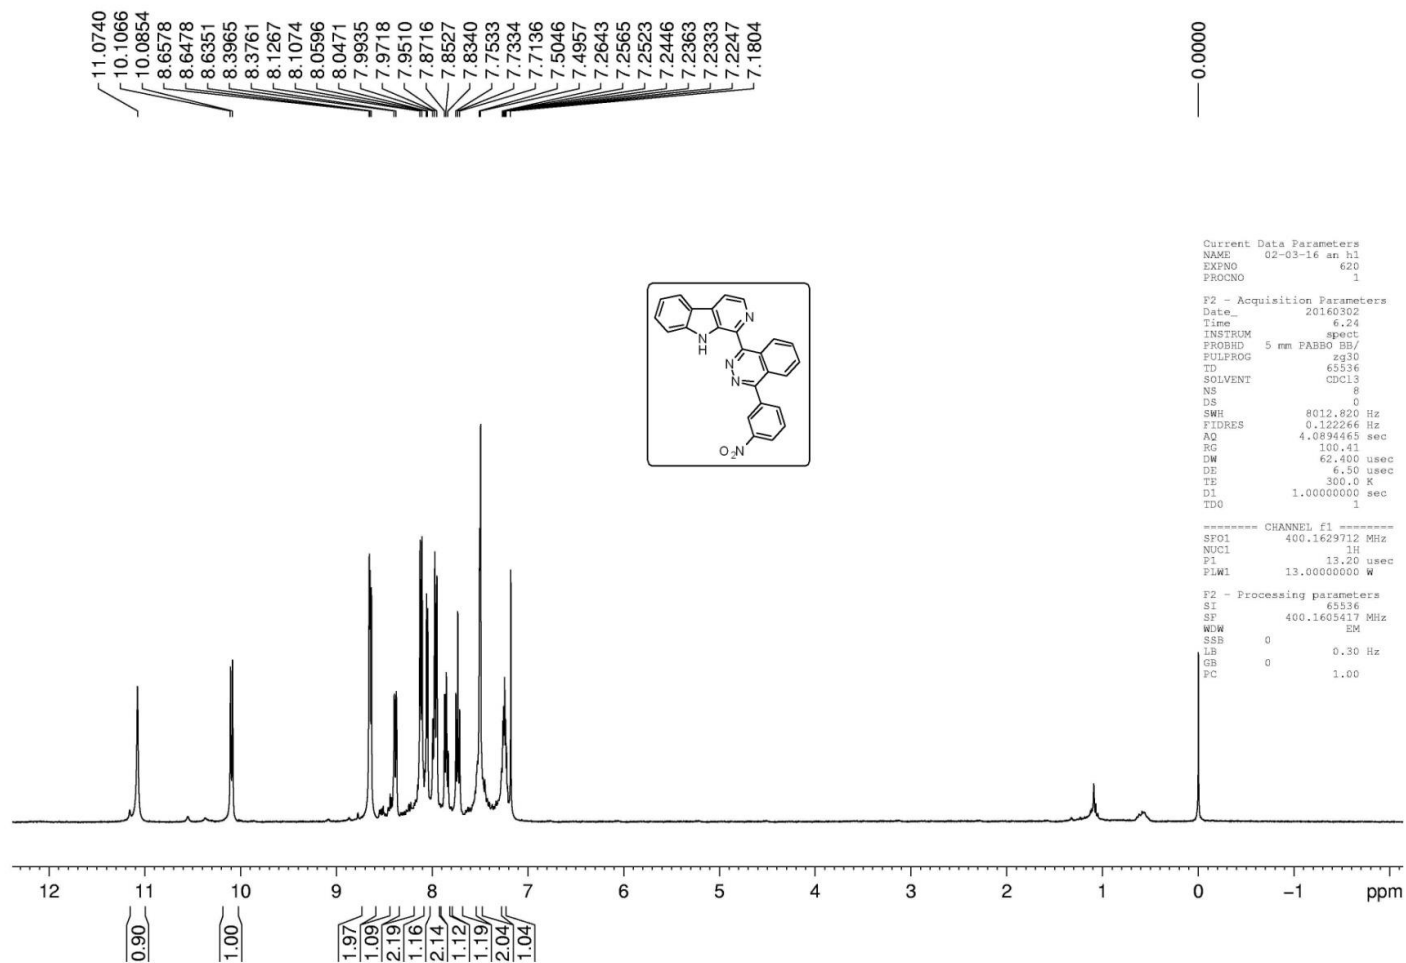

Figure. S-47:  $^1\text{H}$ -NMR spectrum of 1-(4-(3-Nitrophenyl)phthalazin-1-yl)-9H-pyrido[3,4-b]indole (**5ad**).

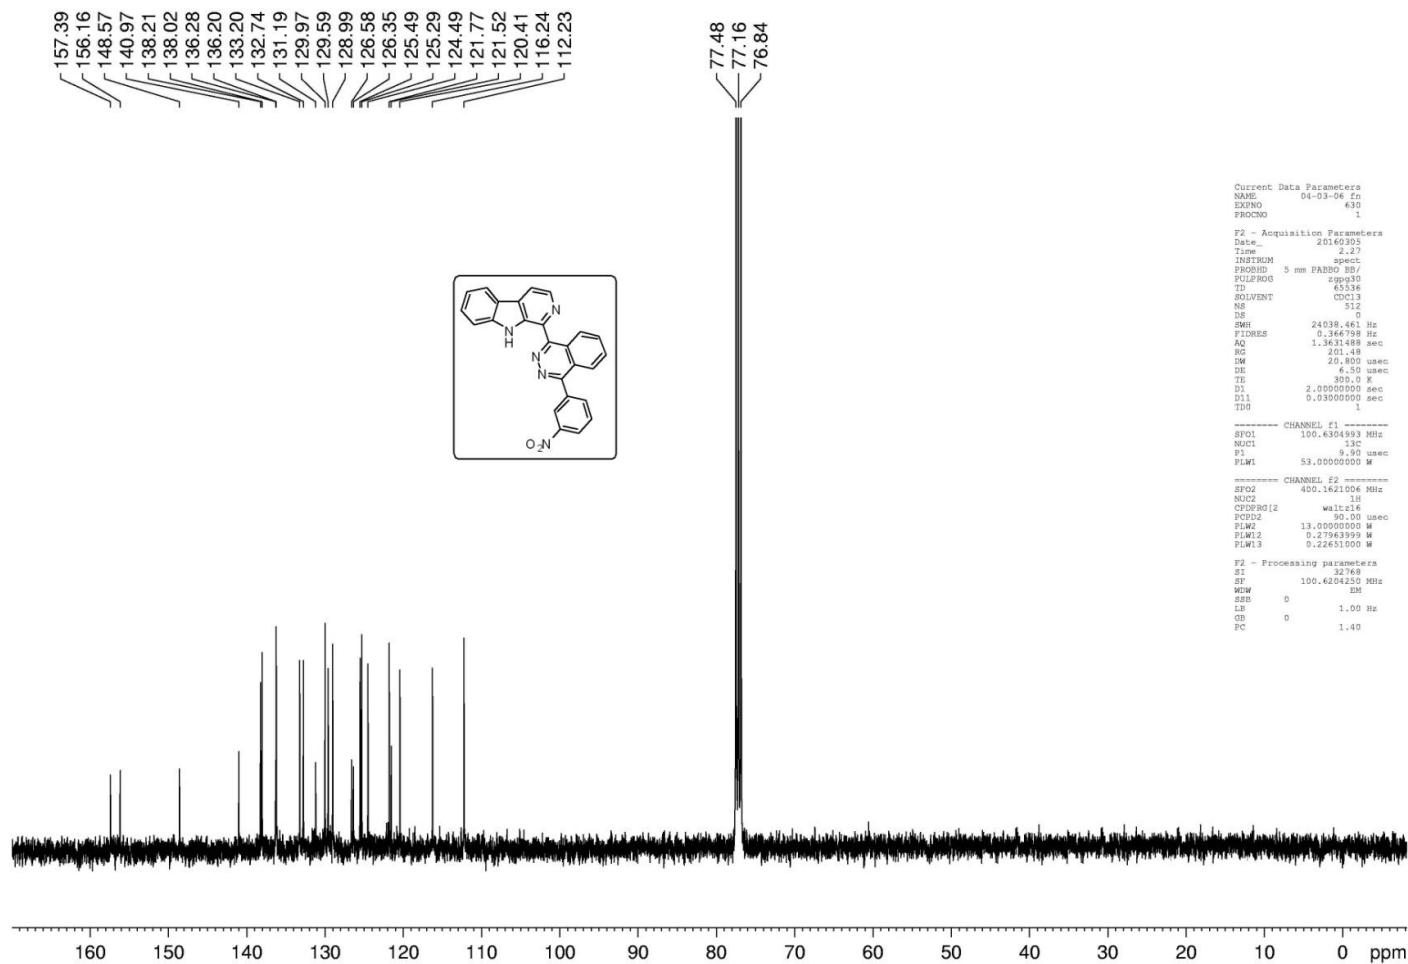

Figure. S-48:  $^{13}\text{C}$ -NMR spectrum of 1-(4-(3-Nitrophenyl)phthalazin-1-yl)-9H-pyrido[3,4-b]indole (**5ad**).

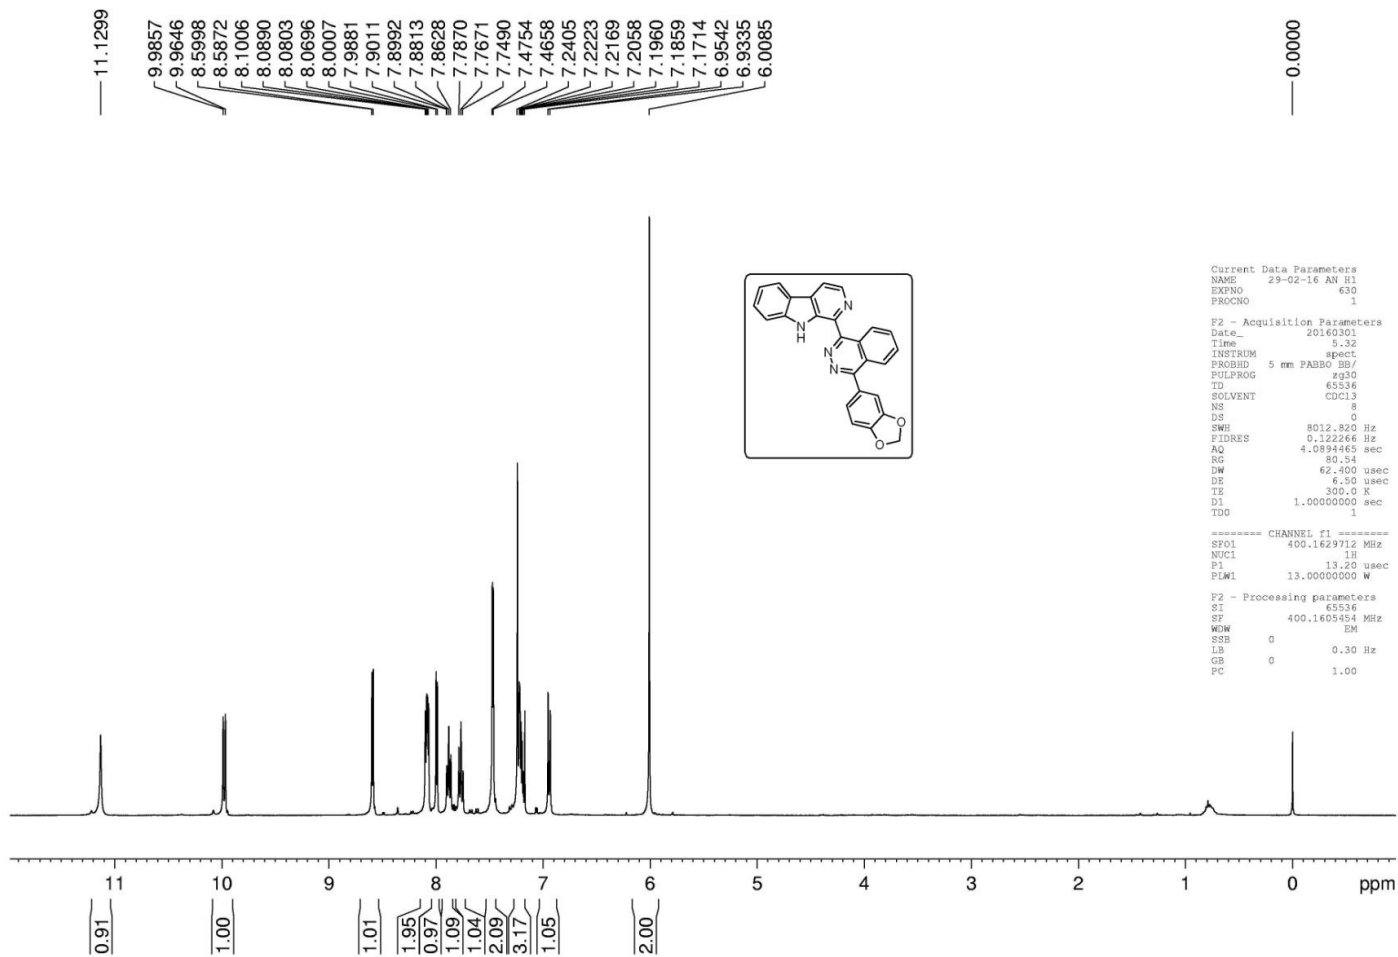

Figure. S-49:  $^1\text{H}$ -NMR spectrum of 1-(4-(Benzo[*d*][1,3]dioxol-5-yl)phthalazin-1-yl)-9*H*-pyrido[3,4-*b*]indole (**5ae**).



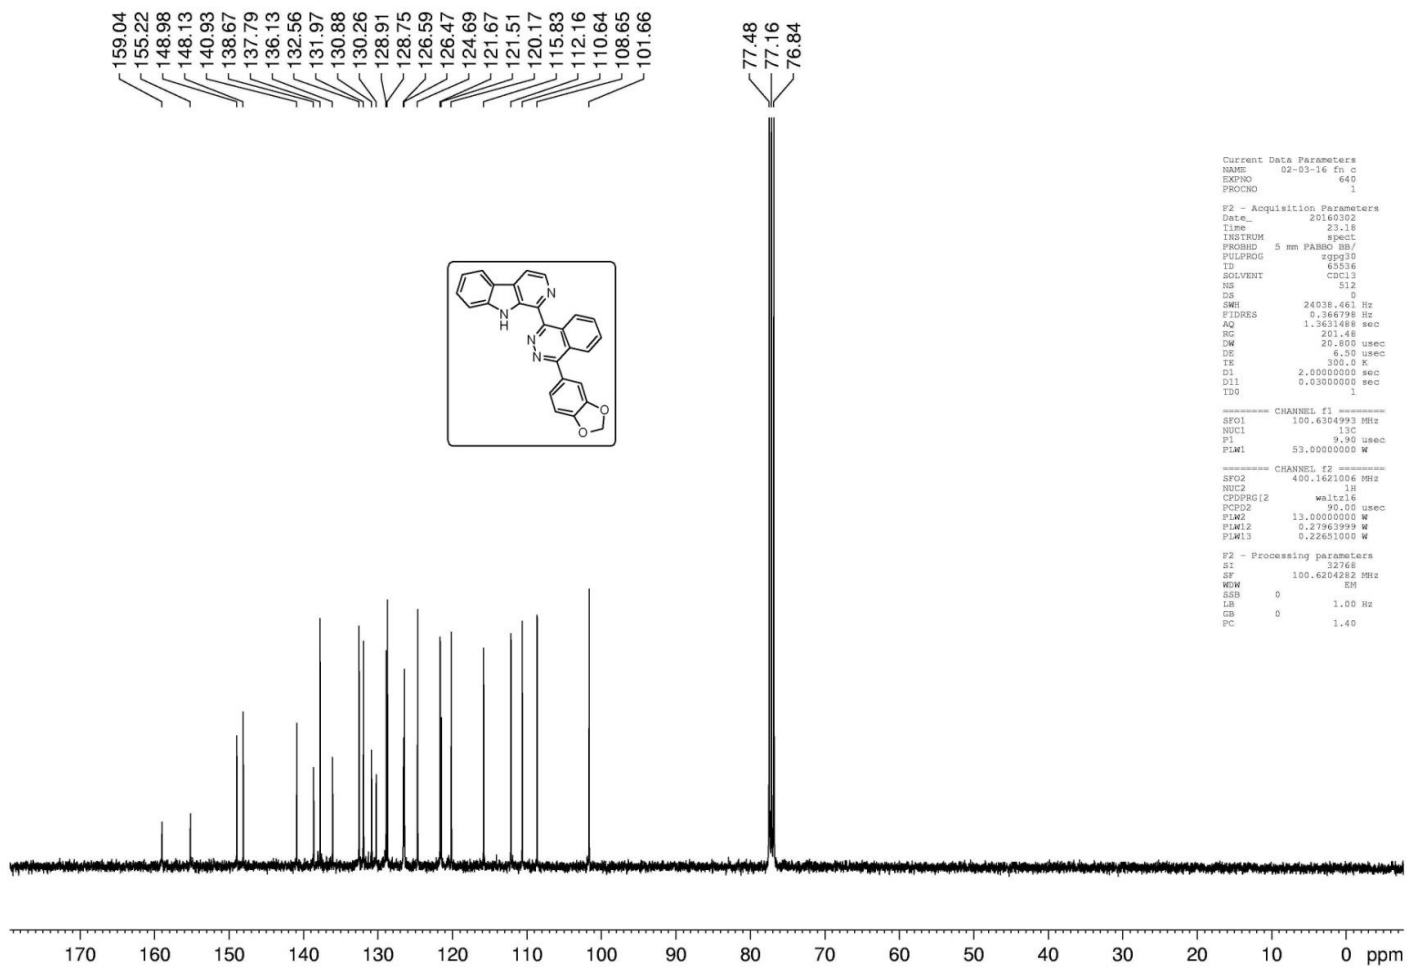

Figure. S-50: <sup>13</sup>C-NMR spectrum of 1-(4-(Benzo[d][1,3]dioxol-5-yl)phthalazin-1-yl)-9H-pyrido[3,4-b]indole (5ae).

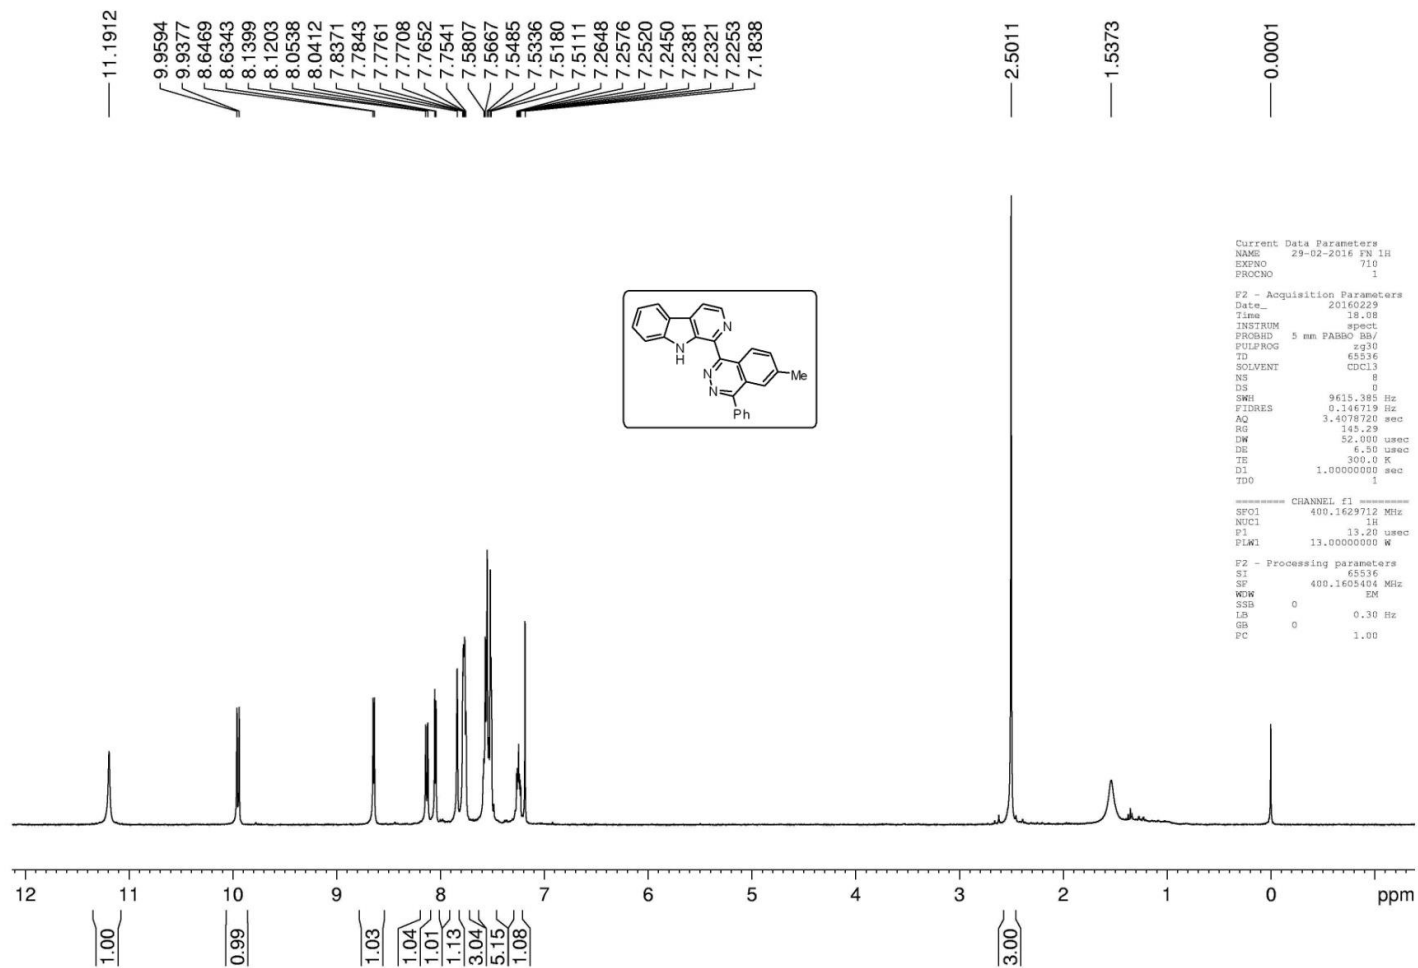

Figure. S-51:  $^1\text{H}$ -NMR spectrum of 1-(6-Methyl-4-phenylphthalazin-1-yl)-9H-pyrido[3,4-b]indole (**5ba**).

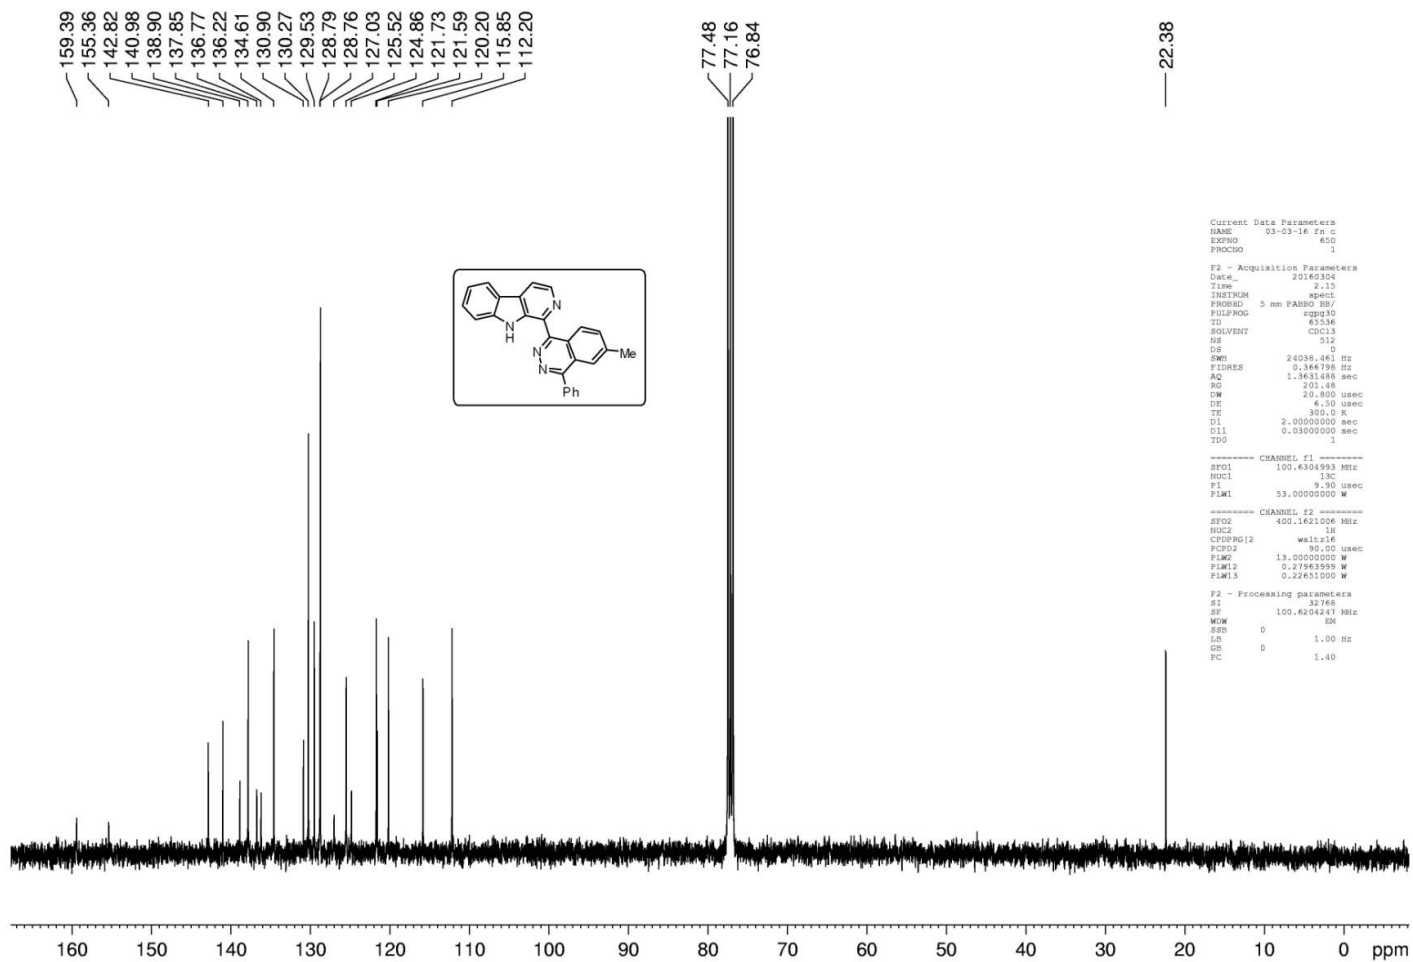

Figure. S-52: <sup>13</sup>C-NMR spectrum of 1-(6-Methyl-4-phenylphthalazin-1-yl)-9H-pyrido[3,4-b]indole (5ba).

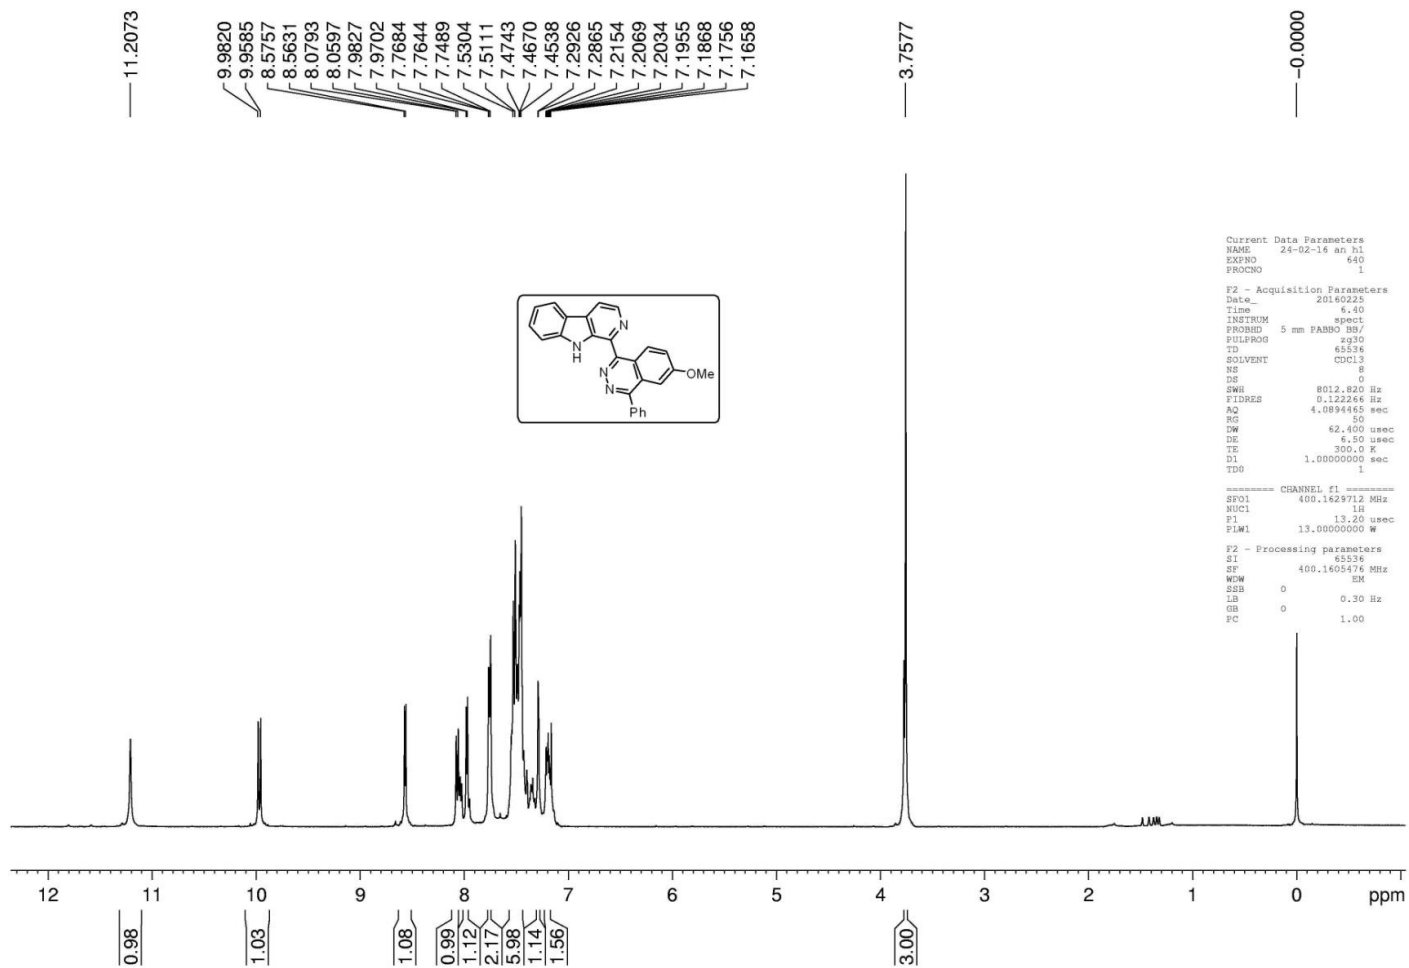

Figure. S-53:  $^1\text{H}$ -NMR spectrum of 1-(6-Methoxy-4-phenylphthalazin-1-yl)-9H-pyrido[3,4-b]indole (**5ca**).

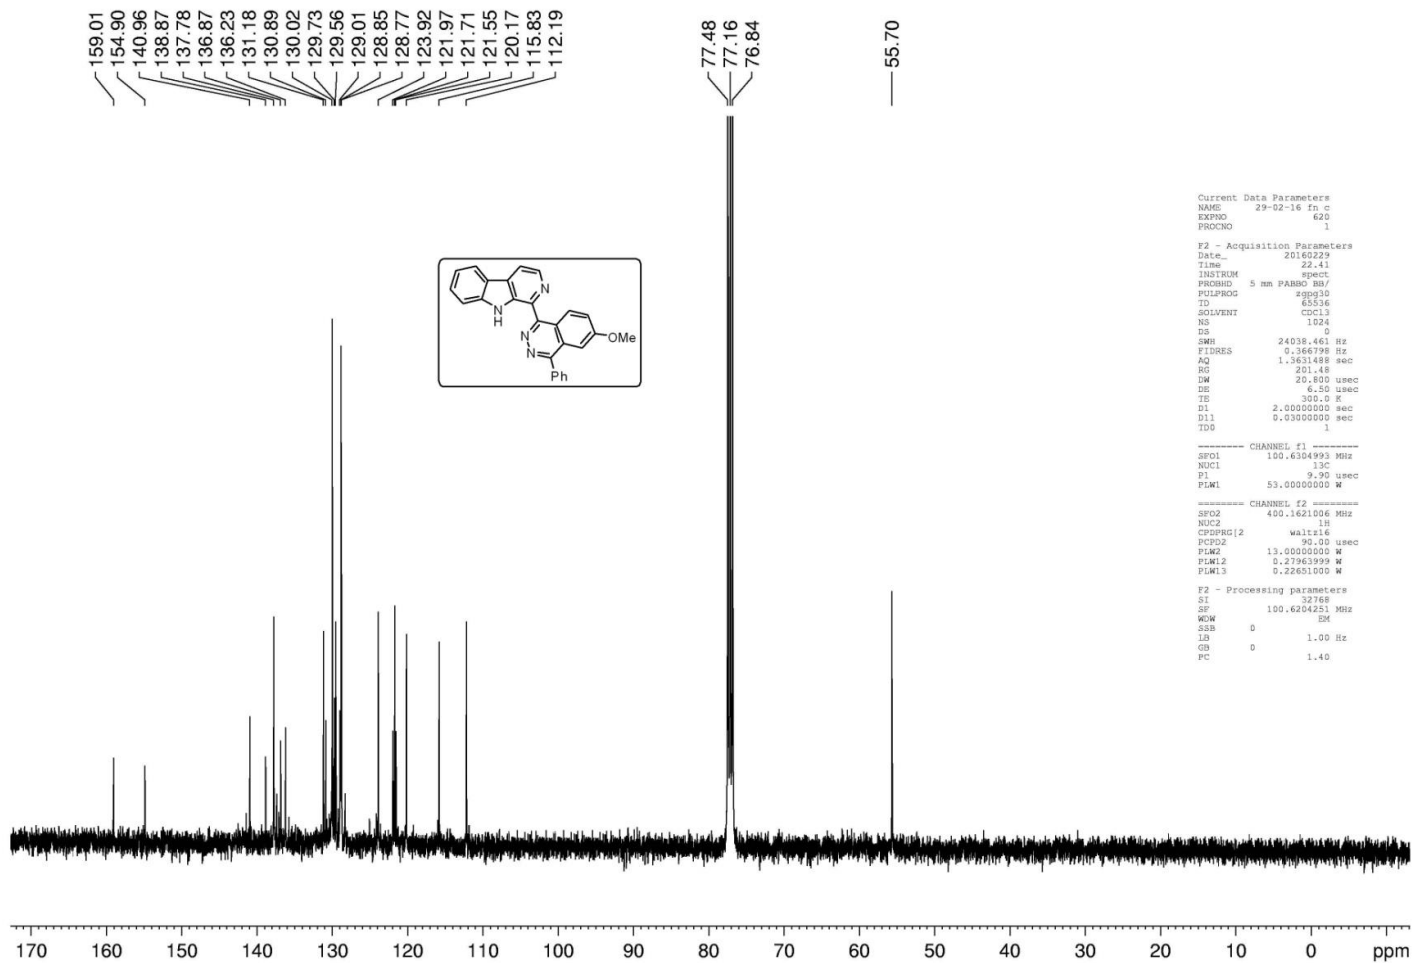

Figure. S-54:  $^{13}\text{C}$ -NMR spectrum of 1-(6-Methoxy-4-phenylphthalazin-1-yl)-9H-pyrido[3,4-b]indole (**5ca**).

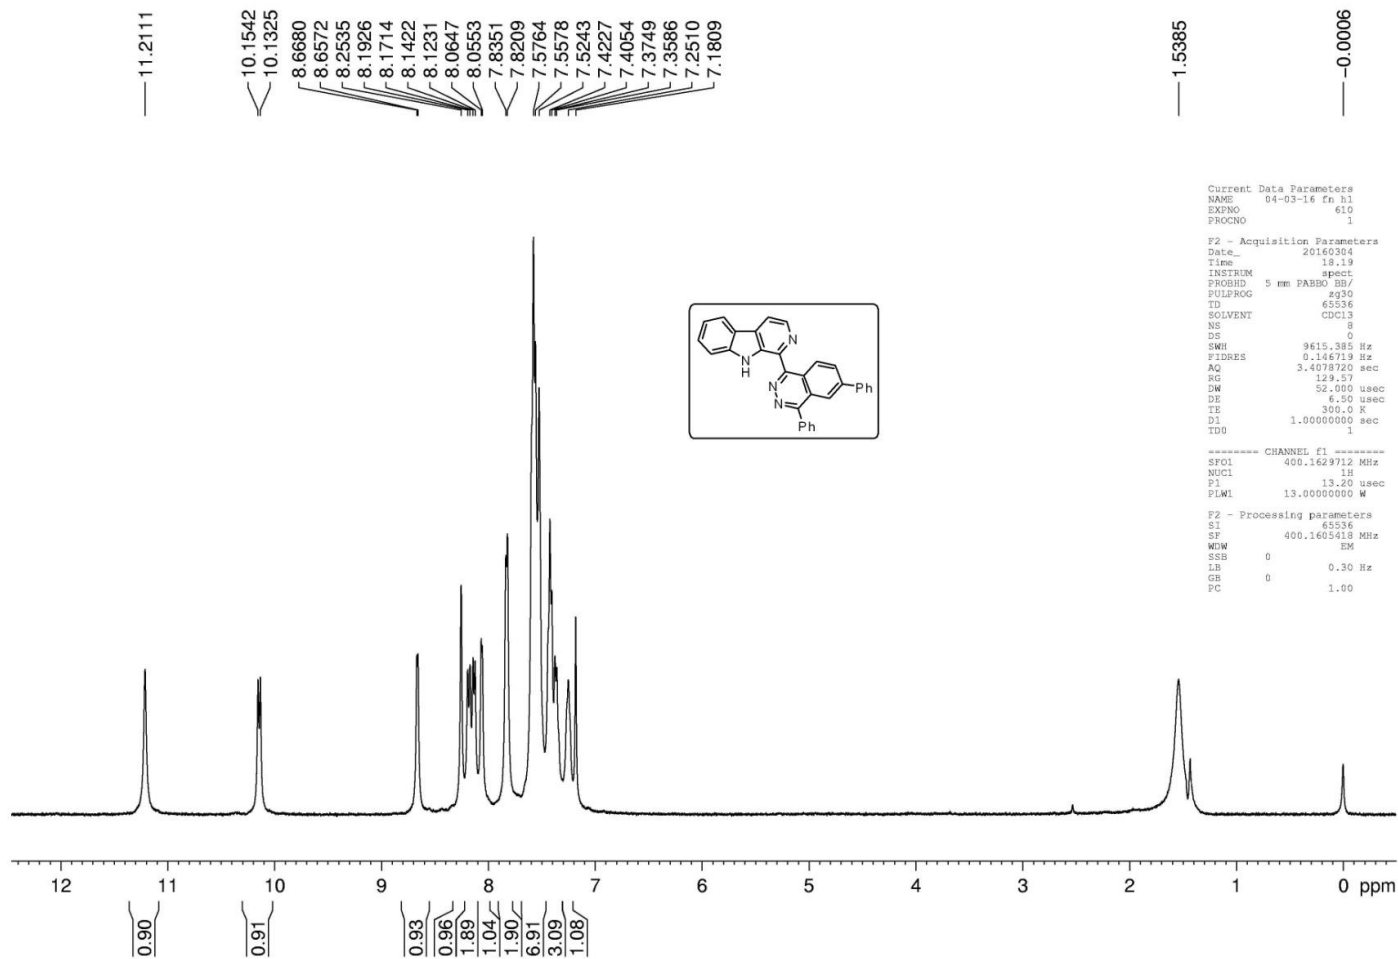

Figure. S-55:  $^1\text{H}$ -NMR spectrum of 1-(4,6-Diphenylphthalazin-1-yl)-9H-pyrido[3,4-b]indole (**5da**).

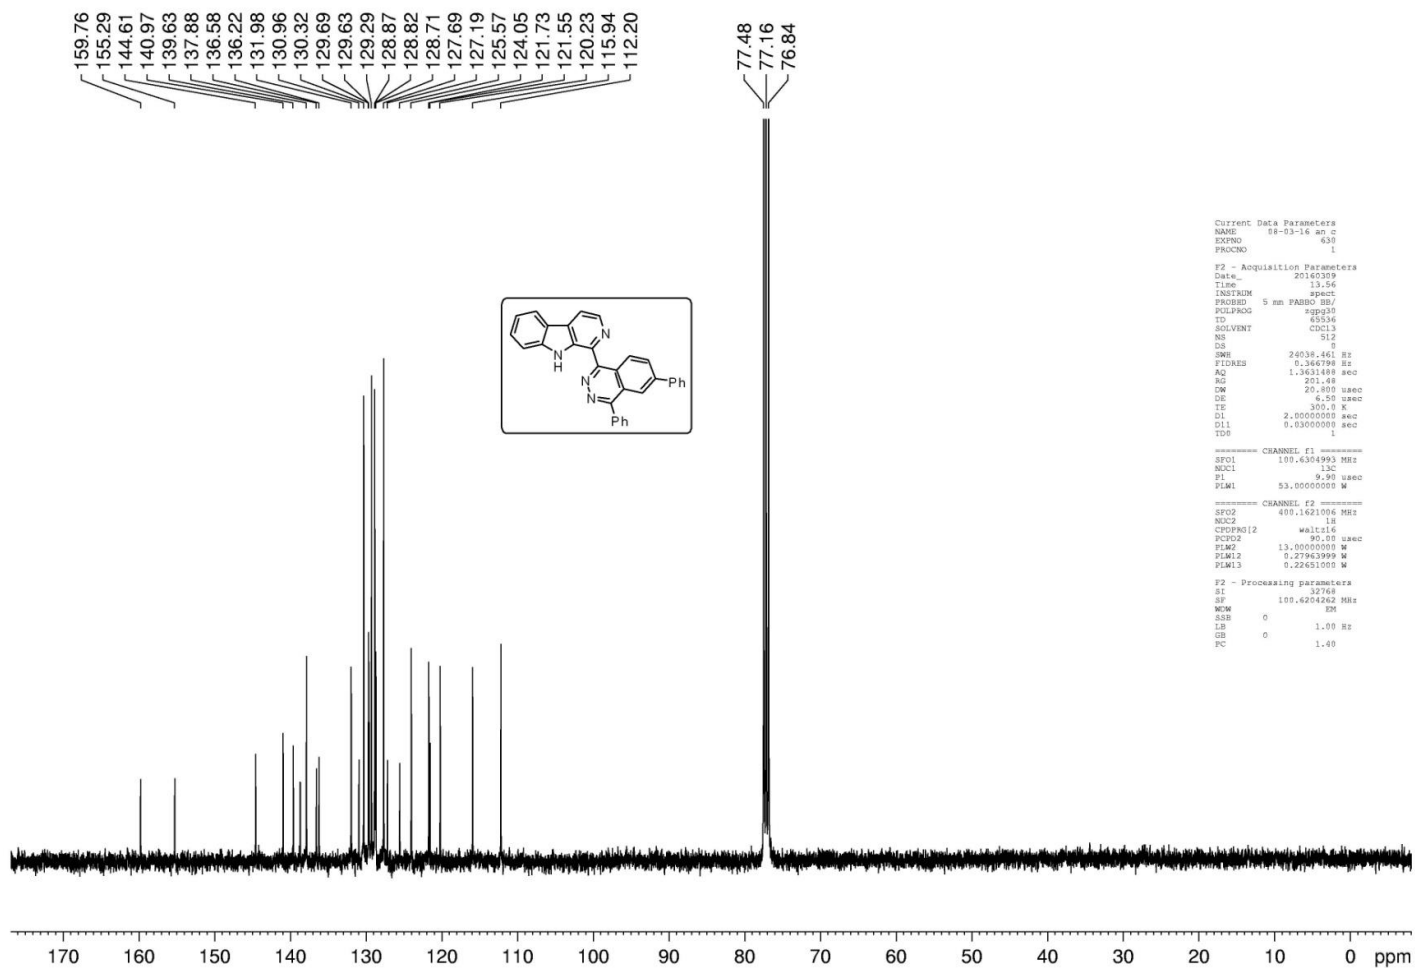

Figure. S-56:  $^{13}\text{C}$ -NMR spectrum of 1-(4,6-Diphenylphthalazin-1-yl)-9H-pyrido[3,4-b]indole (**5da**).

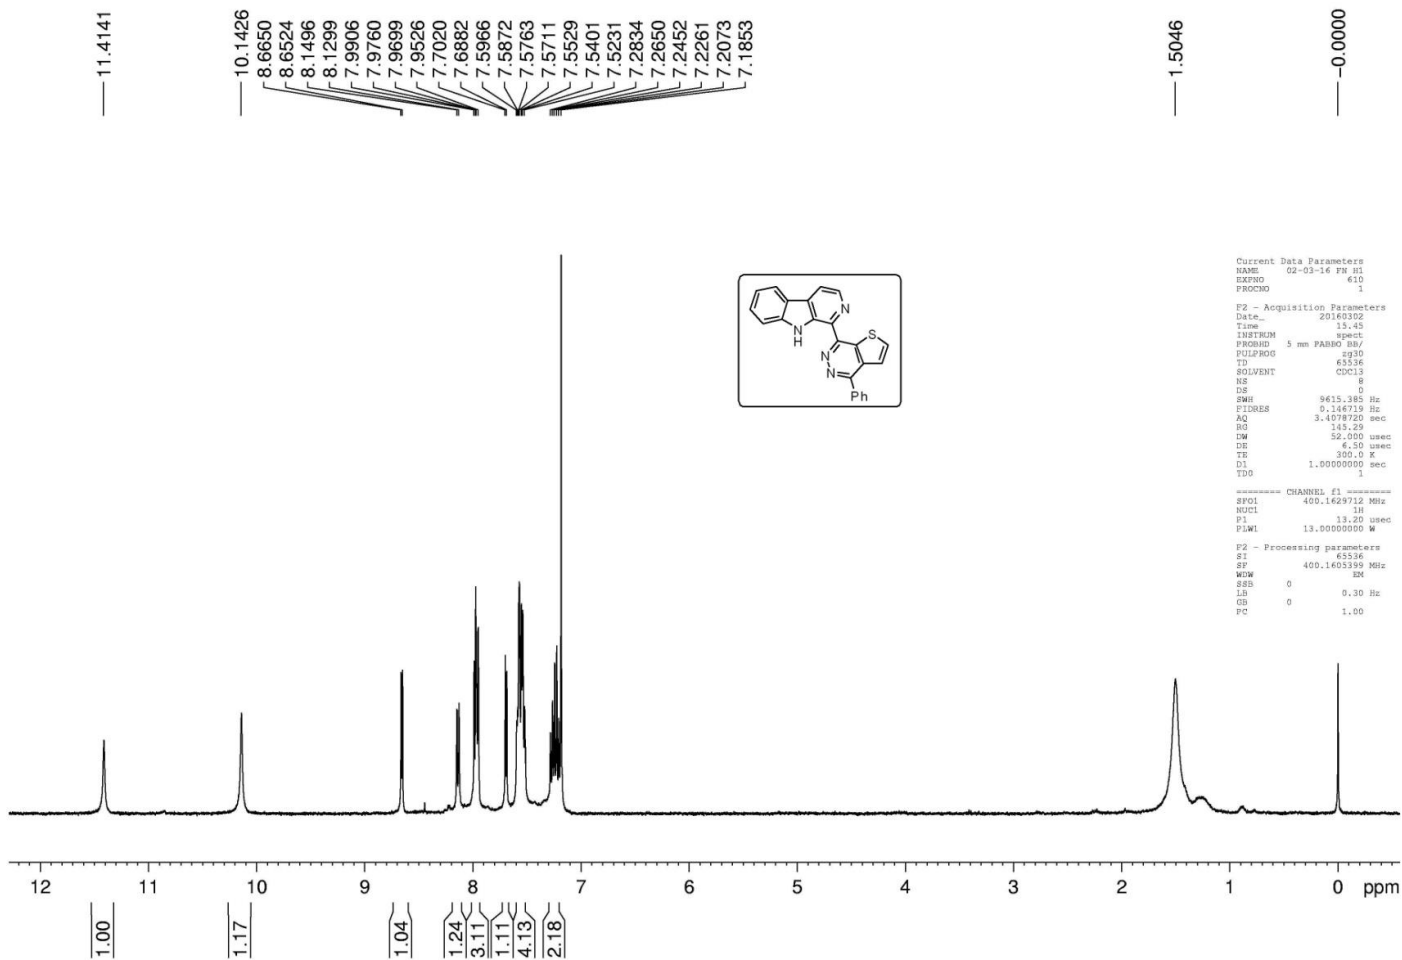

Figure. S-57: <sup>1</sup>H-NMR spectrum of 4-Phenyl-7-(9H-pyrido[3,4-b]indol-1-yl)thieno[2,3-d]pyridazine (5ka).



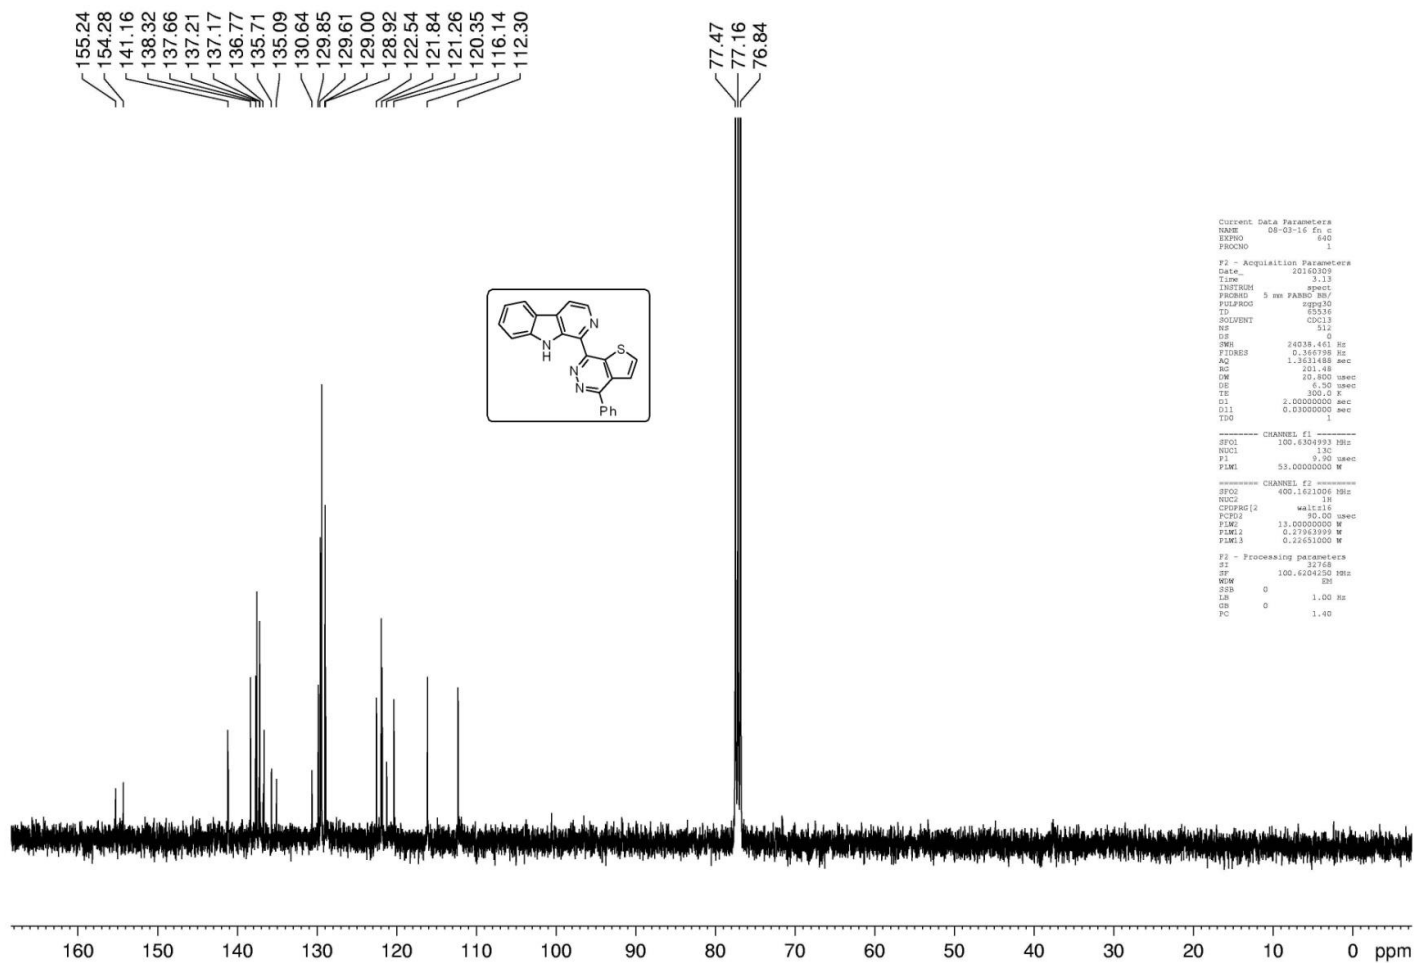

Figure. S-58:  $^{13}\text{C}$ -NMR spectrum of 4-Phenyl-7-(9H-pyrido[3,4-b]indol-1-yl)thieno[2,3-d]pyridazine (**5ka**).

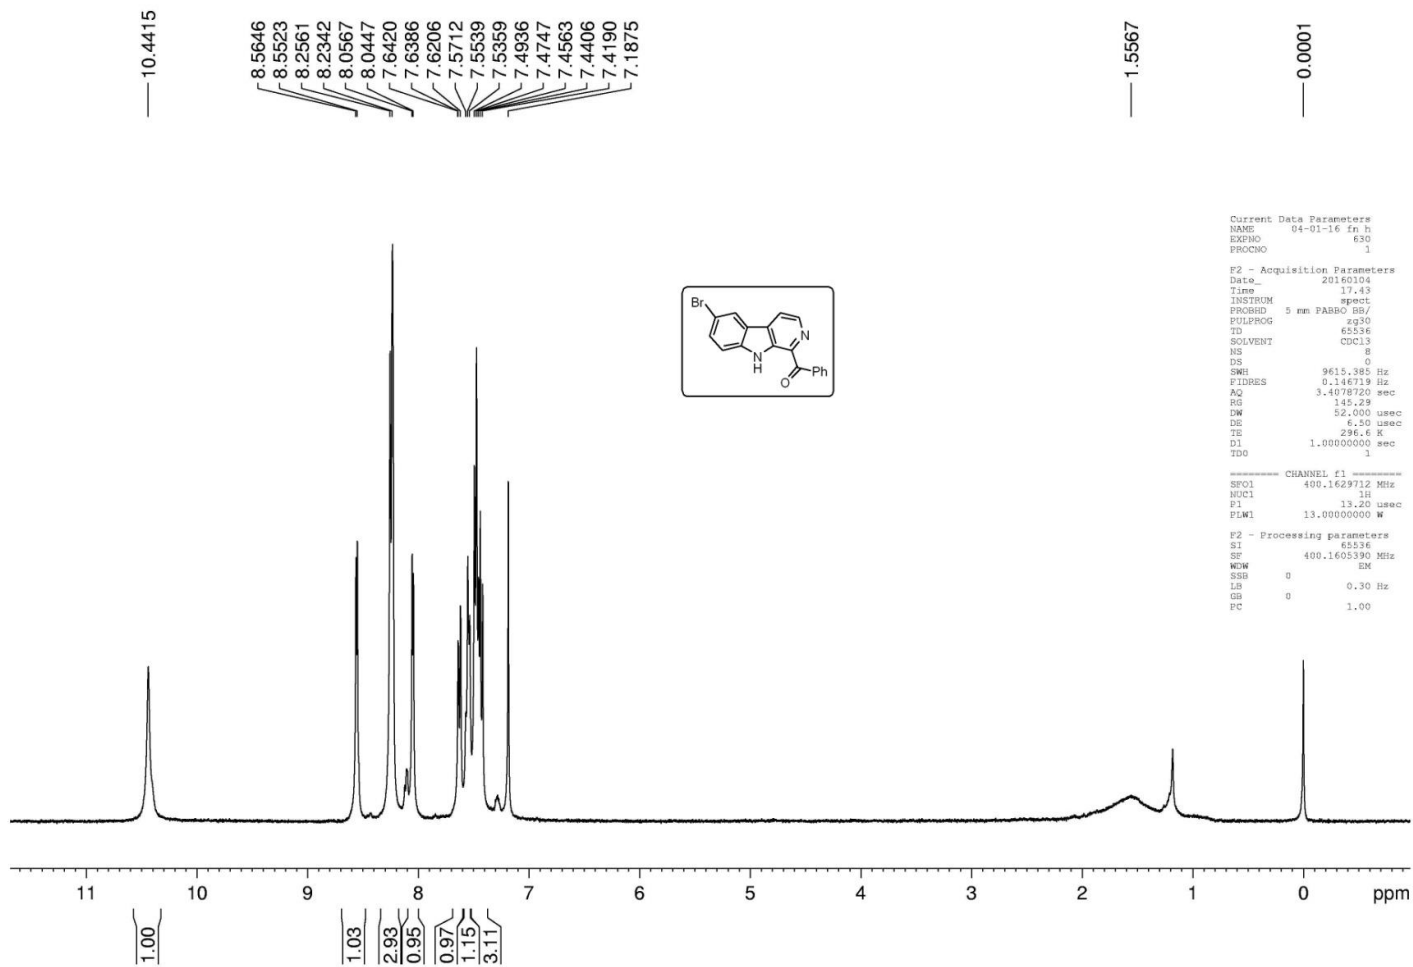

**Figure. S-59:**  $^1\text{H-NMR}$  spectrum of (6-bromo-9H-pyrido[3,4-b]indol-1-yl)(phenyl)methanone (**1m**).

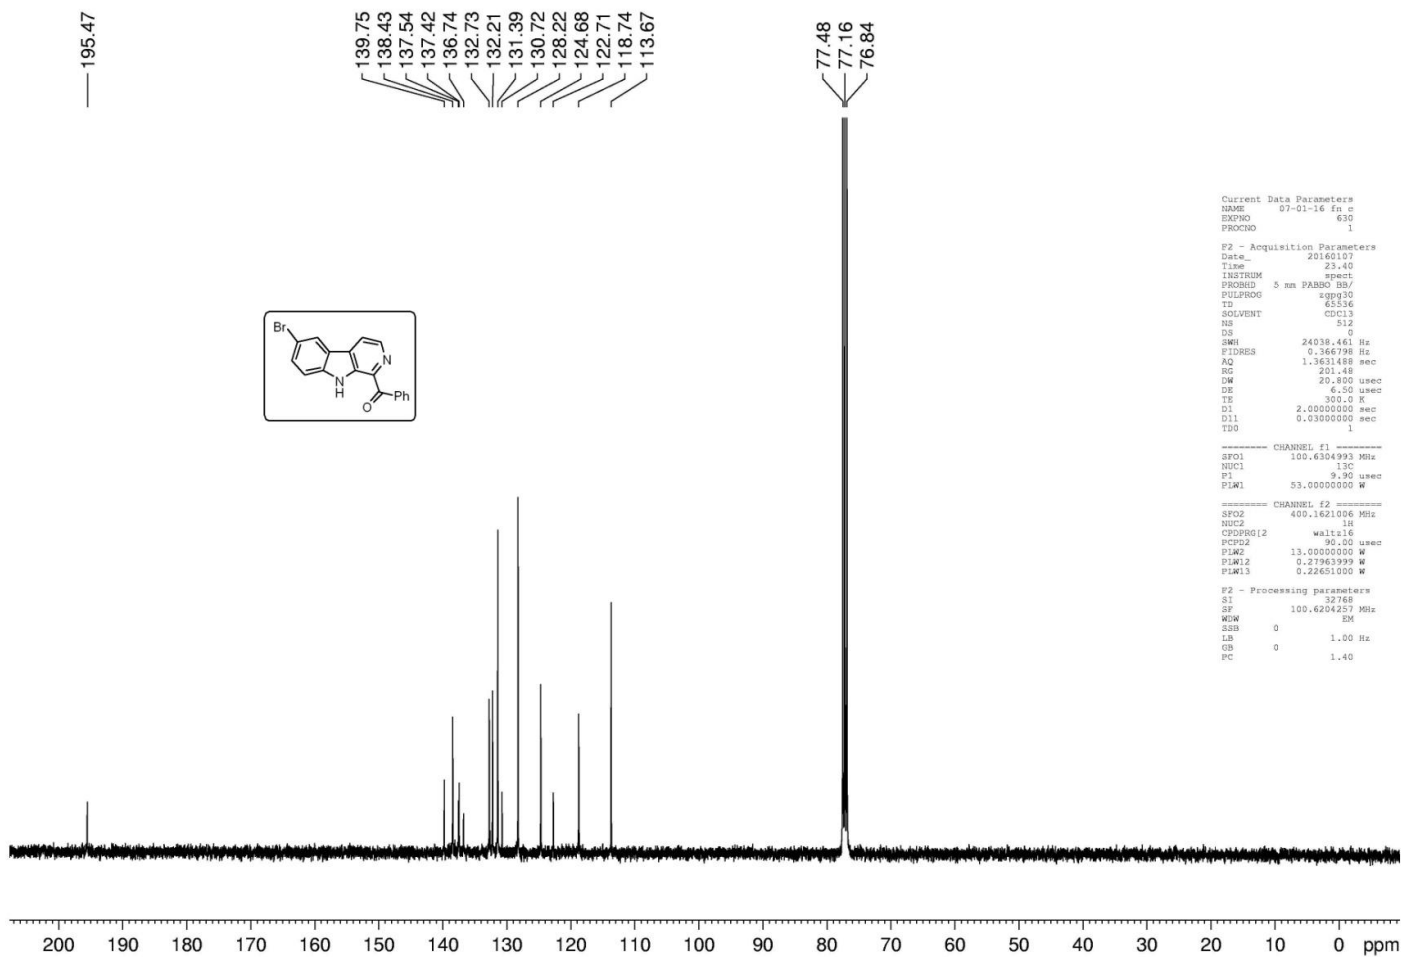

**Figure. S-60:** <sup>13</sup>C-NMR spectrum of (6-Bromo-9H-pyrido[3,4-b]indol-1-yl)(phenyl)methanone (**1m**).

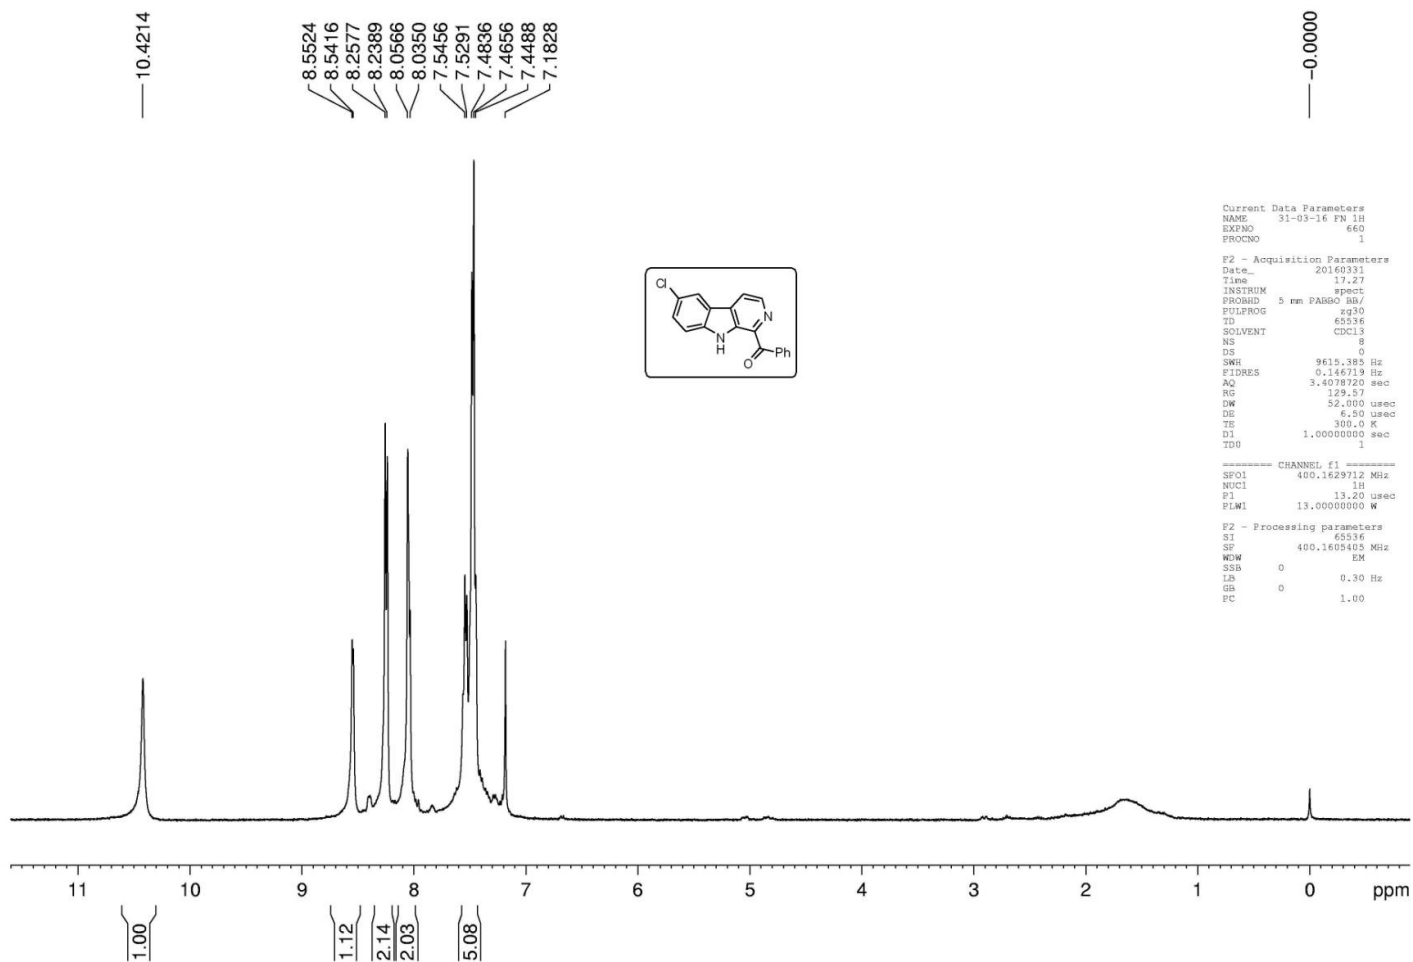

**Figure. S-61:**  $^1\text{H-NMR}$  spectrum of (6-Chloro-9H-pyrido[3,4-b]indol-1-yl)(phenyl)methanone (**1n**).

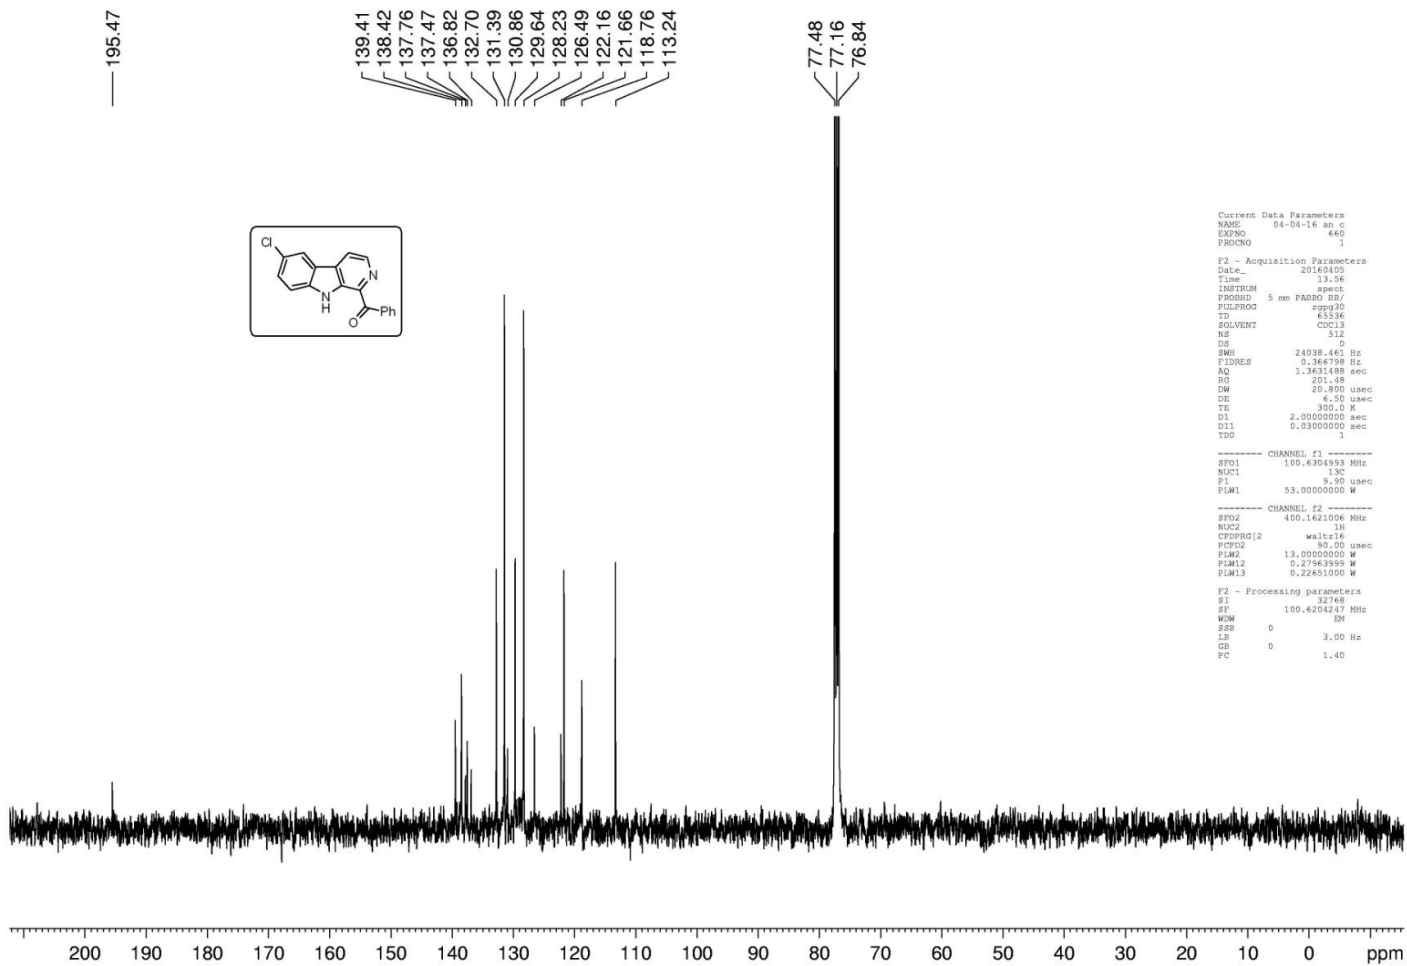

**Figure. S-62:** <sup>13</sup>C-NMR spectrum of (6-Chloro-9H-pyrido[3,4-b]indol-1-yl)(phenyl)methanone (**1n**).

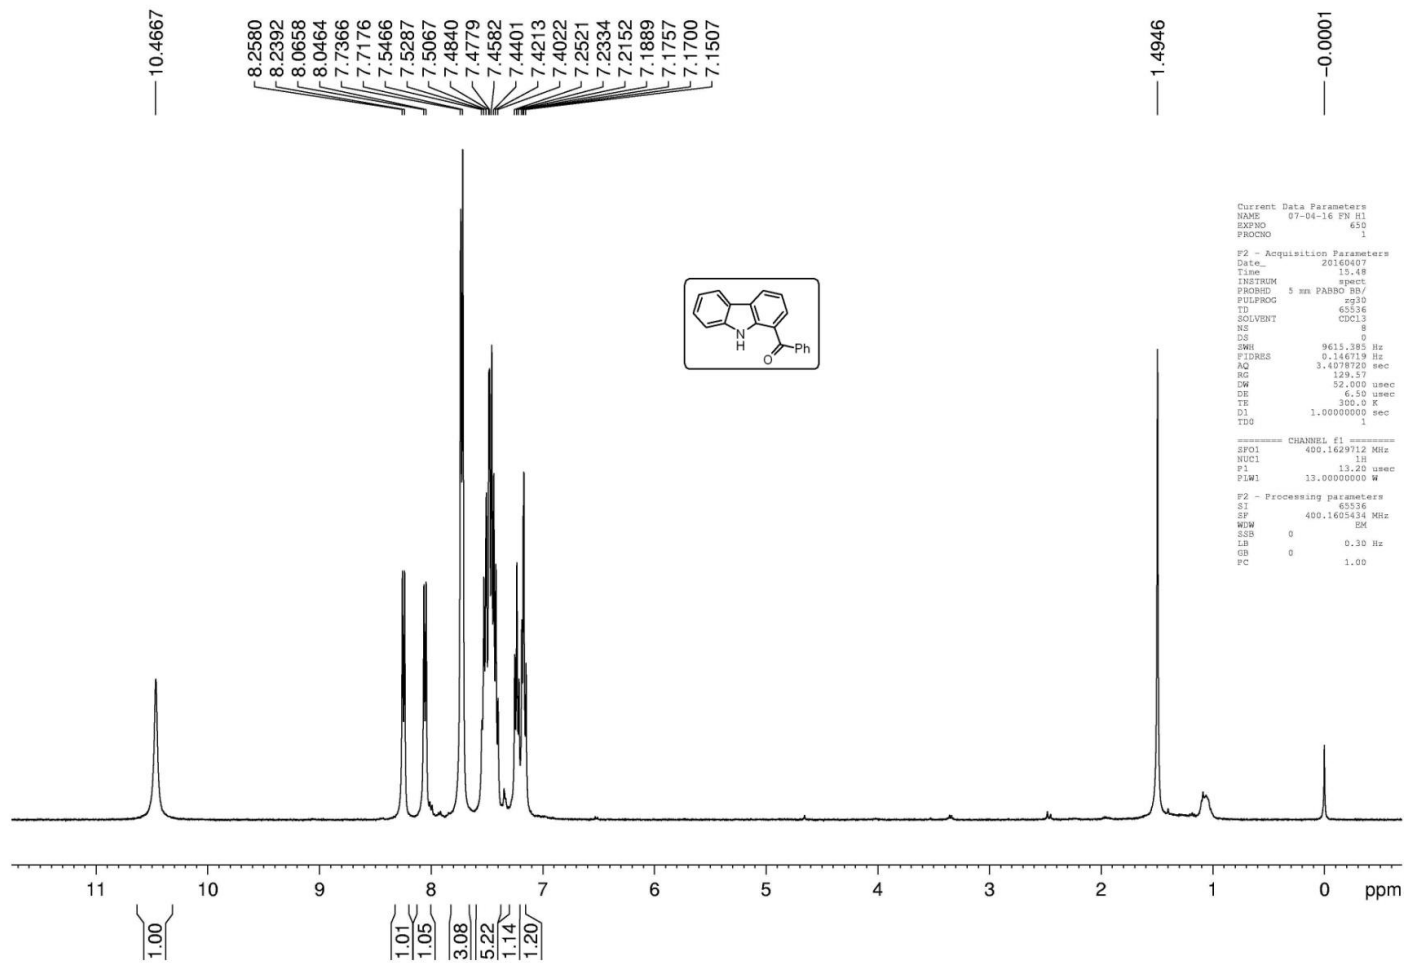

Figure. S-63:  $^1\text{H}$ -NMR spectrum of (9H-carbazol-1-yl)(phenyl)methanone (4).

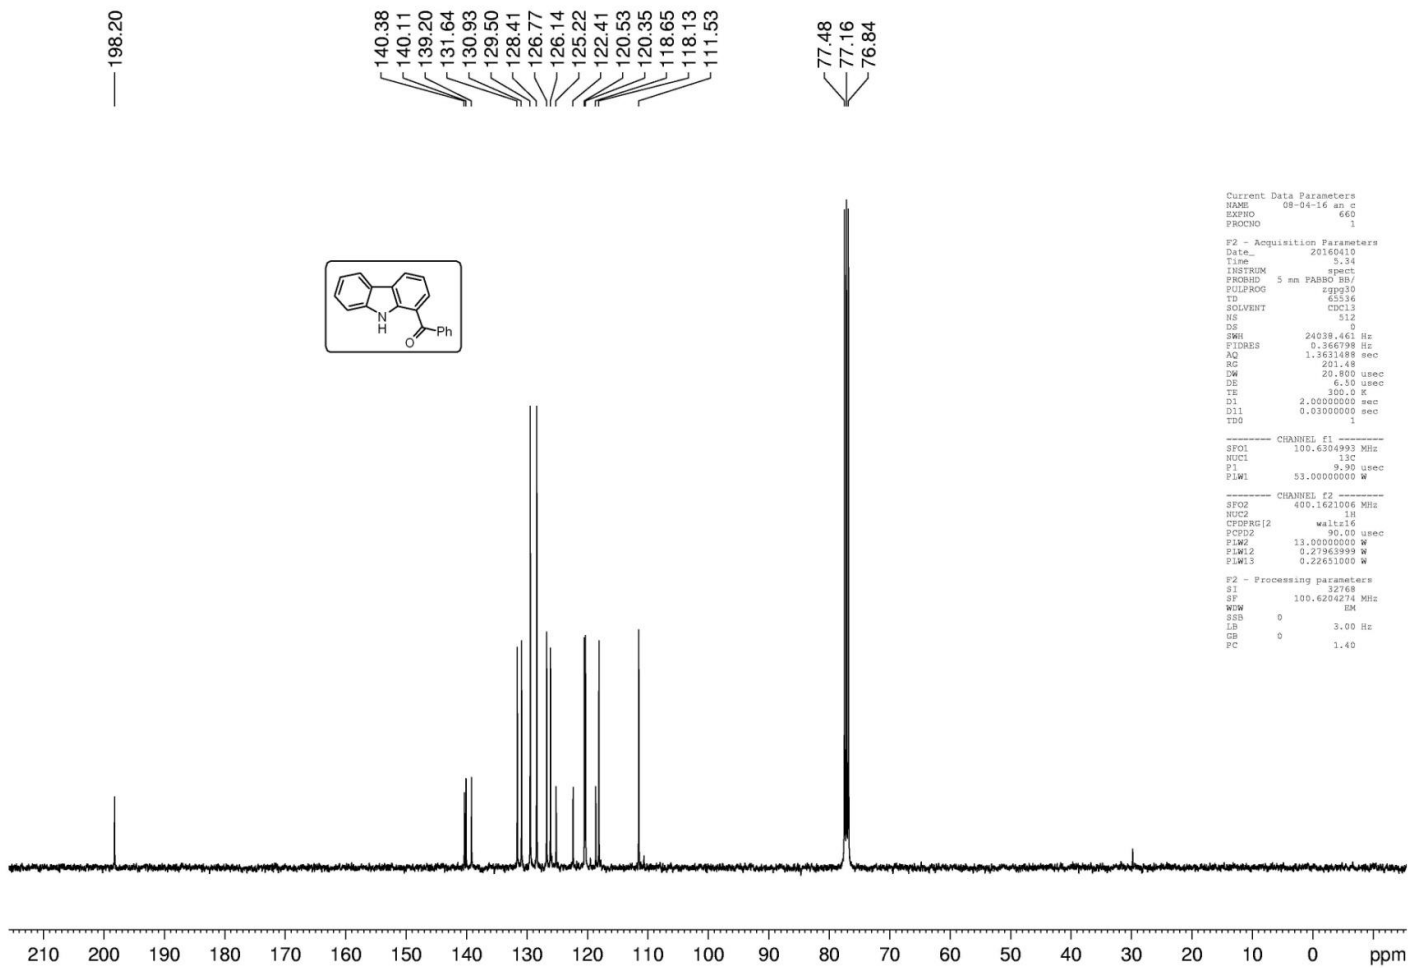

Figure. S-64: <sup>13</sup>C-NMR spectrum of (9H-carbazol-1-yl)(phenyl)methanone (4).
